# Supplementary material for: Experimental Study on the Aperture of Geomagnetic Location Arrays
Source: Hindawi journal article supplement (doi:10.1155/2019/7491871), 2019-03-07
Supplement: f1 [file 7491871.f1.xls]

## Sheet: Sheet1
RMg1_nT	RMg2_nT	RMg3_nT	RMg4_nT	△T1-6	△T2-6	△T3-6	△△T1-6	△△T2-6	△△T3-6
55311.1	55312.5	55312.1	55315.9	-4.777	-3.3672	-3.7606	-1.143	0.0498	-1.7836	-3.9721
55311.1	55312.5	55312.1	55315.9	-4.7768	-3.3654	-3.7606	-1.1428	0.0516	-1.7836	-3.9707
55311.1	55312.5	55312.1	55315.9	-4.7782	-3.3662	-3.761	-1.1442	0.0508	-1.784	-3.9693
55311.1	55312.5	55312.1	55315.9	-4.78	-3.3672	-3.761	-1.146	0.0498	-1.784	-3.9671
55311.1	55312.5	55312.1	55315.9	-4.78	-3.368	-3.7612	-1.146	0.049	-1.7842	-3.9627
55311.1	55312.5	55312.1	55315.9	-4.777	-3.3672	-3.7604	-1.143	0.0498	-1.7834	-3.9571
55311.1	55312.5	55312.1	55315.9	-4.7742	-3.3676	-3.7598	-1.1402	0.0494	-1.7828	-3.9521
55311.1	55312.5	55312.2	55315.9	-4.774	-3.368	-3.7604	-1.14	0.049	-1.7834	-3.9489
55311.1	55312.5	55312.2	55315.9	-4.7738	-3.3662	-3.7606	-1.1398	0.0508	-1.7836	-3.9455
55311.1	55312.6	55312.2	55315.9	-4.7736	-3.364	-3.7588	-1.1396	0.053	-1.7818	-3.9419
55311.1	55312.6	55312.2	55315.9	-4.7756	-3.3662	-3.7582	-1.1416	0.0508	-1.7812	-3.9385
55311.1	55312.6	55312.2	55315.9	-4.7792	-3.37	-3.7592	-1.1452	0.047	-1.7822	-3.9359
55311.2	55312.6	55312.2	55315.9	-4.7818	-3.3708	-3.761	-1.1478	0.0462	-1.784	-3.9335
55311.2	55312.6	55312.2	55315.9	-4.782	-3.3686	-3.7606	-1.148	0.0484	-1.7836	-3.9303
55311.2	55312.6	55312.2	55315.9	-4.7802	-3.3668	-3.7594	-1.1462	0.0502	-1.7824	-3.9239
55311.2	55312.6	55312.2	55315.9	-4.7776	-3.3654	-3.7588	-1.1436	0.0516	-1.7818	-3.9155
55311.2	55312.6	55312.2	55316	-4.7752	-3.365	-3.7594	-1.1412	0.052	-1.7824	-3.9061
55311.2	55312.6	55312.2	55316	-4.7742	-3.3646	-3.7586	-1.1402	0.0524	-1.7816	-3.8989
55311.2	55312.6	55312.2	55316	-4.7754	-3.366	-3.7578	-1.1414	0.051	-1.7808	-3.8925
55311.2	55312.6	55312.2	55316	-4.7774	-3.3686	-3.7578	-1.1434	0.0484	-1.7808	-3.8841
55311.2	55312.6	55312.2	55316	-4.7804	-3.3714	-3.7598	-1.1464	0.0456	-1.7828	-3.8749
55311.2	55312.6	55312.2	55316	-4.7828	-3.3732	-3.7616	-1.1488	0.0438	-1.7846	-3.8659
55311.2	55312.6	55312.2	55316	-4.7828	-3.3722	-3.7618	-1.1488	0.0448	-1.7848	-3.8575
55311.2	55312.6	55312.3	55316	-4.781	-3.3688	-3.7614	-1.147	0.0482	-1.7844	-3.8493
55311.2	55312.7	55312.3	55316	-4.7786	-3.365	-3.7592	-1.1446	0.052	-1.7822	-3.8413
55311.3	55312.7	55312.3	55316	-4.7772	-3.3626	-3.7556	-1.1432	0.0544	-1.7786	-3.8347
55311.3	55312.7	55312.3	55316	-4.7762	-3.3626	-3.7534	-1.1422	0.0544	-1.7764	-3.8283
55311.3	55312.7	55312.3	55316	-4.7744	-3.3636	-3.7538	-1.1404	0.0534	-1.7768	-3.8215
55311.3	55312.7	55312.3	55316	-4.7742	-3.3654	-3.7564	-1.1402	0.0516	-1.7794	-3.8165
55311.3	55312.7	55312.3	55316	-4.7758	-3.369	-3.7584	-1.1418	0.048	-1.7814	-3.8135
55311.3	55312.7	55312.3	55316	-4.7778	-3.3694	-3.757	-1.1438	0.0476	-1.78	-3.8143
55311.3	55312.7	55312.3	55316	-4.7796	-3.3676	-3.7554	-1.1456	0.0494	-1.7784	-3.8175
55311.3	55312.7	55312.3	55316	-4.7804	-3.3658	-3.756	-1.1464	0.0512	-1.779	-3.8209
55311.3	55312.7	55312.3	55316	-4.78	-3.3652	-3.7576	-1.146	0.0518	-1.7806	-3.8241
55311.3	55312.7	55312.3	55316	-4.7786	-3.3666	-3.7584	-1.1446	0.0504	-1.7814	-3.8271
55311.3	55312.7	55312.3	55316	-4.7766	-3.3678	-3.758	-1.1426	0.0492	-1.781	-3.8313
55311.2	55312.7	55312.3	55316	-4.7762	-3.3694	-3.758	-1.1422	0.0476	-1.781	-3.8385
55311.2	55312.6	55312.3	55316	-4.777	-3.3716	-3.7592	-1.143	0.0454	-1.7822	-3.8481
55311.2	55312.6	55312.2	55316	-4.779	-3.3722	-3.76	-1.145	0.0448	-1.783	-3.8607
55311.2	55312.6	55312.2	55316	-4.7818	-3.3712	-3.7594	-1.1478	0.0458	-1.7824	-3.8759
55311.2	55312.6	55312.2	55316	-4.7834	-3.3688	-3.7574	-1.1494	0.0482	-1.7804	-3.8921
55311.2	55312.6	55312.2	55316	-4.7828	-3.3672	-3.7554	-1.1488	0.0498	-1.7784	-3.9075
55311.2	55312.6	55312.2	55315.9	-4.7814	-3.3692	-3.7546	-1.1474	0.0478	-1.7776	-3.9213
55311.2	55312.6	55312.2	55315.9	-4.7788	-3.3706	-3.755	-1.1448	0.0464	-1.778	-3.9343
55311.1	55312.5	55312.2	55315.9	-4.7774	-3.3706	-3.7574	-1.1434	0.0464	-1.7804	-3.9483
55311.1	55312.5	55312.1	55315.9	-4.7762	-3.369	-3.7596	-1.1422	0.048	-1.7826	-3.9641
55311.1	55312.5	55312.1	55315.9	-4.776	-3.3664	-3.7604	-1.142	0.0506	-1.7834	-3.9825
55311.1	55312.5	55312.1	55315.9	-4.7762	-3.364	-3.7596	-1.1422	0.053	-1.7826	-4.0025
55311.1	55312.5	55312.1	55315.8	-4.7782	-3.3632	-3.7586	-1.1442	0.0538	-1.7816	-4.0241
55311	55312.5	55312.1	55315.8	-4.7824	-3.3646	-3.7594	-1.1484	0.0524	-1.7824	-4.0469
55311	55312.4	55312	55315.8	-4.7862	-3.3674	-3.7618	-1.1522	0.0496	-1.7848	-4.0695
55311	55312.4	55312	55315.8	-4.786	-3.3682	-3.7616	-1.152	0.0488	-1.7846	-4.0913
55311	55312.4	55312	55315.8	-4.783	-3.3676	-3.7604	-1.149	0.0494	-1.7834	-4.1113
55311	55312.4	55312	55315.7	-4.7798	-3.367	-3.759	-1.1458	0.05	-1.782	-4.1293
55310.9	55312.4	55312	55315.7	-4.78	-3.367	-3.7592	-1.146	0.05	-1.7822	-4.1467
55310.9	55312.3	55311.9	55315.7	-4.7824	-3.3672	-3.7598	-1.1484	0.0498	-1.7828	-4.1639
55310.9	55312.3	55311.9	55315.7	-4.7848	-3.3676	-3.7604	-1.1508	0.0494	-1.7834	-4.1803
55310.9	55312.3	55311.9	55315.7	-4.7858	-3.3688	-3.761	-1.1518	0.0482	-1.784	-4.1939
55310.9	55312.3	55311.9	55315.7	-4.7844	-3.369	-3.7616	-1.1504	0.048	-1.7846	-4.2031
55310.9	55312.3	55311.9	55315.7	-4.7806	-3.3672	-3.7604	-1.1466	0.0498	-1.7834	-4.2085
55310.9	55312.3	55311.9	55315.7	-4.7778	-3.3652	-3.7594	-1.1438	0.0518	-1.7824	-4.2119
55310.9	55312.3	55311.9	55315.6	-4.7778	-3.365	-3.7598	-1.1438	0.052	-1.7828	-4.2139
55310.9	55312.3	55311.9	55315.7	-4.779	-3.3674	-3.76	-1.145	0.0496	-1.783	-4.2139
55310.9	55312.3	55311.9	55315.7	-4.7808	-3.3698	-3.7602	-1.1468	0.0472	-1.7832	-4.2123
55310.9	55312.3	55311.9	55315.7	-4.7822	-3.3702	-3.7614	-1.1482	0.0468	-1.7844	-4.2089
55310.9	55312.3	55311.9	55315.7	-4.7836	-3.369	-3.7632	-1.1496	0.048	-1.7862	-4.2049
55310.9	55312.3	55311.9	55315.7	-4.7846	-3.3684	-3.7642	-1.1506	0.0486	-1.7872	-4.1995
55310.9	55312.3	55311.9	55315.7	-4.7842	-3.3688	-3.7624	-1.1502	0.0482	-1.7854	-4.1917
55310.9	55312.3	55311.9	55315.7	-4.7824	-3.3678	-3.7598	-1.1484	0.0492	-1.7828	-4.1821
55310.9	55312.3	55311.9	55315.7	-4.7814	-3.3662	-3.7598	-1.1474	0.0508	-1.7828	-4.1715
55310.9	55312.3	55311.9	55315.7	-4.7812	-3.367	-3.7604	-1.1472	0.05	-1.7834	-4.1601
55310.9	55312.3	55312	55315.7	-4.7808	-3.3696	-3.7614	-1.1468	0.0474	-1.7844	-4.1481
55311	55312.4	55312	55315.7	-4.7788	-3.371	-3.7618	-1.1448	0.046	-1.7848	-4.1349
55311	55312.4	55312	55315.7	-4.7776	-3.3696	-3.7612	-1.1436	0.0474	-1.7842	-4.1229
55311	55312.4	55312	55315.8	-4.78	-3.3688	-3.7636	-1.146	0.0482	-1.7866	-4.1125
55311	55312.4	55312	55315.8	-4.7832	-3.37	-3.7656	-1.1492	0.047	-1.7886	-4.1023
55311	55312.4	55312	55315.8	-4.7848	-3.3726	-3.766	-1.1508	0.0444	-1.789	-4.0905
55311	55312.4	55312	55315.8	-4.7848	-3.3754	-3.7658	-1.1508	0.0416	-1.7888	-4.0767
55311	55312.4	55312	55315.8	-4.7848	-3.3766	-3.7656	-1.1508	0.0404	-1.7886	-4.0623
55311	55312.4	55312.1	55315.8	-4.7854	-3.3756	-3.7654	-1.1514	0.0414	-1.7884	-4.0491
55311	55312.5	55312.1	55315.8	-4.7838	-3.3722	-3.7626	-1.1498	0.0448	-1.7856	-4.0365
55311.1	55312.5	55312.1	55315.8	-4.7824	-3.3686	-3.7592	-1.1484	0.0484	-1.7822	-4.0257
55311.1	55312.5	55312.1	55315.9	-4.7824	-3.3678	-3.7598	-1.1484	0.0492	-1.7828	-4.0159
55311.1	55312.5	55312.1	55315.9	-4.782	-3.3688	-3.7618	-1.148	0.0482	-1.7848	-4.0079
55311.1	55312.5	55312.1	55315.9	-4.7808	-3.3698	-3.7624	-1.1468	0.0472	-1.7854	-4.0045
55311.1	55312.5	55312.1	55315.9	-4.779	-3.3682	-3.7608	-1.145	0.0488	-1.7838	-4.0081
55311.1	55312.5	55312.1	55315.8	-4.779	-3.367	-3.7604	-1.145	0.05	-1.7834	-4.0193
55311	55312.5	55312.1	55315.8	-4.78	-3.3668	-3.7624	-1.146	0.0502	-1.7854	-4.0365
55311	55312.4	55312	55315.8	-4.782	-3.369	-3.7634	-1.148	0.048	-1.7864	-4.0581
55311	55312.4	55312	55315.8	-4.7828	-3.3694	-3.7614	-1.1488	0.0476	-1.7844	-4.0831
55311	55312.4	55312	55315.8	-4.782	-3.367	-3.7576	-1.148	0.05	-1.7806	-4.1097
55311	55312.4	55312	55315.7	-4.7804	-3.3652	-3.7574	-1.1464	0.0518	-1.7804	-4.1349
55310.9	55312.3	55311.9	55315.7	-4.7798	-3.3646	-3.761	-1.1458	0.0524	-1.784	-4.1587
55310.9	55312.3	55311.9	55315.7	-4.7806	-3.3642	-3.7634	-1.1466	0.0528	-1.7864	-4.1819
55310.9	55312.3	55311.9	55315.7	-4.7822	-3.365	-3.7626	-1.1482	0.052	-1.7856	-4.2039
55310.9	55312.3	55311.9	55315.6	-4.7828	-3.367	-3.762	-1.1488	0.05	-1.785	-4.2219
55310.8	55312.3	55311.9	55315.6	-4.7842	-3.371	-3.7636	-1.1502	0.046	-1.7866	-4.2367
55310.8	55312.2	55311.9	55315.6	-4.784	-3.3716	-3.7652	-1.15	0.0454	-1.7882	-4.2489
55310.8	55312.2	55311.8	55315.6	-4.783	-3.3688	-3.7638	-1.149	0.0482	-1.7868	-4.2609
55310.8	55312.2	55311.8	55315.6	-4.782	-3.3658	-3.7608	-1.148	0.0512	-1.7838	-4.2731
55310.8	55312.2	55311.8	55315.6	-4.7832	-3.3654	-3.7598	-1.1492	0.0516	-1.7828	-4.2861
55310.8	55312.2	55311.8	55315.6	-4.7852	-3.368	-3.7618	-1.1512	0.049	-1.7848	-4.2983
55310.8	55312.2	55311.8	55315.6	-4.7868	-3.3704	-3.7642	-1.1528	0.0466	-1.7872	-4.3093
55310.8	55312.2	55311.8	55315.6	-4.7868	-3.3716	-3.767	-1.1528	0.0454	-1.79	-4.3191
55310.8	55312.2	55311.8	55315.5	-4.7852	-3.3706	-3.7668	-1.1512	0.0464	-1.7898	-4.3299
55310.7	55312.2	55311.8	55315.5	-4.7814	-3.3686	-3.7636	-1.1474	0.0484	-1.7866	-4.3413
55310.7	55312.1	55311.8	55315.5	-4.7812	-3.3692	-3.7618	-1.1472	0.0478	-1.7848	-4.3543
55310.7	55312.1	55311.7	55315.5	-4.784	-3.3706	-3.761	-1.15	0.0464	-1.784	-4.3681
55310.7	55312.1	55311.7	55315.5	-4.7846	-3.3692	-3.7606	-1.1506	0.0478	-1.7836	-4.3797
55310.7	55312.1	55311.7	55315.5	-4.7804	-3.3652	-3.7606	-1.1464	0.0518	-1.7836	-4.3877
55310.7	55312.1	55311.7	55315.5	-4.7792	-3.364	-3.7624	-1.1452	0.053	-1.7854	-4.3957
55310.7	55312.1	55311.7	55315.5	-4.7838	-3.3656	-3.7654	-1.1498	0.0514	-1.7884	-4.4055
55310.7	55312.1	55311.7	55315.5	-4.7892	-3.368	-3.7674	-1.1552	0.049	-1.7904	-4.4147
55310.7	55312.1	55311.7	55315.5	-4.7904	-3.3696	-3.768	-1.1564	0.0474	-1.791	-4.4205
55310.7	55312.1	55311.7	55315.5	-4.787	-3.3706	-3.7682	-1.153	0.0464	-1.7912	-4.4221
55310.7	55312.1	55311.7	55315.4	-4.785	-3.3722	-3.7682	-1.151	0.0448	-1.7912	-4.4235
55310.7	55312.1	55311.7	55315.4	-4.7856	-3.3722	-3.767	-1.1516	0.0448	-1.79	-4.4259
55310.7	55312.1	55311.7	55315.4	-4.7852	-3.3708	-3.7646	-1.1512	0.0462	-1.7876	-4.4271
55310.7	55312.1	55311.7	55315.4	-4.785	-3.3702	-3.7624	-1.151	0.0468	-1.7854	-4.4279
55310.7	55312.1	55311.7	55315.4	-4.785	-3.371	-3.7626	-1.151	0.046	-1.7856	-4.4275
55310.7	55312.1	55311.7	55315.4	-4.7858	-3.372	-3.7662	-1.1518	0.045	-1.7892	-4.4263
55310.7	55312.1	55311.7	55315.4	-4.7882	-3.3722	-3.7696	-1.1542	0.0448	-1.7926	-4.4255
55310.7	55312.1	55311.7	55315.4	-4.7886	-3.3712	-3.7682	-1.1546	0.0458	-1.7912	-4.4245
55310.7	55312.1	55311.7	55315.4	-4.7876	-3.369	-3.764	-1.1536	0.048	-1.787	-4.4237
55310.7	55312.1	55311.7	55315.4	-4.7864	-3.366	-3.7622	-1.1524	0.051	-1.7852	-4.4225
55310.7	55312.1	55311.7	55315.5	-4.7844	-3.3644	-3.764	-1.1504	0.0526	-1.787	-4.4193
55310.7	55312.1	55311.7	55315.5	-4.784	-3.3652	-3.767	-1.15	0.0518	-1.79	-4.4163
55310.7	55312.1	55311.7	55315.5	-4.7846	-3.3684	-3.7674	-1.1506	0.0486	-1.7904	-4.4147
55310.7	55312.1	55311.7	55315.5	-4.7874	-3.371	-3.7668	-1.1534	0.046	-1.7898	-4.4161
55310.7	55312.1	55311.7	55315.5	-4.7894	-3.3706	-3.7676	-1.1554	0.0464	-1.7906	-4.4183
55310.7	55312.1	55311.7	55315.5	-4.788	-3.37	-3.7694	-1.154	0.047	-1.7924	-4.4181
55310.7	55312.1	55311.7	55315.5	-4.7856	-3.3706	-3.7706	-1.1516	0.0464	-1.7936	-4.4175
55310.7	55312.1	55311.7	55315.4	-4.7858	-3.371	-3.7686	-1.1518	0.046	-1.7916	-4.4215
55310.7	55312.1	55311.7	55315.4	-4.7878	-3.3704	-3.764	-1.1538	0.0466	-1.787	-4.4301
55310.6	55312.1	55311.7	55315.4	-4.7894	-3.3702	-3.7622	-1.1554	0.0468	-1.7852	-4.4387
55310.6	55312.1	55311.7	55315.4	-4.7896	-3.3718	-3.7652	-1.1556	0.0452	-1.7882	-4.4447
55310.6	55312.1	55311.7	55315.4	-4.7894	-3.3726	-3.7684	-1.1554	0.0444	-1.7914	-4.4501
55310.6	55312	55311.6	55315.4	-4.7884	-3.3706	-3.769	-1.1544	0.0464	-1.792	-4.4577
55310.6	55312	55311.6	55315.4	-4.7872	-3.3694	-3.769	-1.1532	0.0476	-1.792	-4.4663
55310.6	55312	55311.6	55315.4	-4.785	-3.3696	-3.7686	-1.151	0.0474	-1.7916	-4.4739
55310.6	55312	55311.6	55315.4	-4.7854	-3.3716	-3.7684	-1.1514	0.0454	-1.7914	-4.4825
55310.6	55312	55311.6	55315.4	-4.7868	-3.3726	-3.7666	-1.1528	0.0444	-1.7896	-4.4931
55310.6	55312	55311.6	55315.4	-4.7874	-3.3712	-3.7642	-1.1534	0.0458	-1.7872	-4.5057
55310.6	55312	55311.6	55315.4	-4.7894	-3.3696	-3.7648	-1.1554	0.0474	-1.7878	-4.5217
55310.5	55312	55311.6	55315.3	-4.7906	-3.3692	-3.7674	-1.1566	0.0478	-1.7904	-4.5391
55310.5	55311.9	55311.5	55315.3	-4.79	-3.3702	-3.77	-1.156	0.0468	-1.793	-4.5573
55310.5	55311.9	55311.5	55315.3	-4.7884	-3.3724	-3.7714	-1.1544	0.0446	-1.7944	-4.5761
55310.5	55311.9	55311.5	55315.3	-4.7876	-3.3734	-3.77	-1.1536	0.0436	-1.793	-4.5969
55310.5	55311.9	55311.5	55315.3	-4.79	-3.3722	-3.7684	-1.156	0.0448	-1.7914	-4.6229
55310.4	55311.9	55311.5	55315.2	-4.792	-3.3712	-3.7682	-1.158	0.0458	-1.7912	-4.6515
55310.4	55311.8	55311.4	55315.2	-4.7902	-3.3712	-3.7676	-1.1562	0.0458	-1.7906	-4.6797
55310.4	55311.8	55311.4	55315.2	-4.7892	-3.373	-3.7676	-1.1552	0.044	-1.7906	-4.7087
55310.3	55311.8	55311.4	55315.1	-4.7888	-3.3752	-3.7674	-1.1548	0.0418	-1.7904	-4.7391
55310.3	55311.7	55311.3	55315.1	-4.7892	-3.3762	-3.7676	-1.1552	0.0408	-1.7906	-4.7719
55310.3	55311.7	55311.3	55315.1	-4.789	-3.3746	-3.7678	-1.155	0.0424	-1.7908	-4.8061
55310.2	55311.7	55311.3	55315	-4.7888	-3.373	-3.768	-1.1548	0.044	-1.791	-4.8403
55310.2	55311.6	55311.2	55315	-4.7876	-3.3712	-3.7672	-1.1536	0.0458	-1.7902	-4.8729
55310.2	55311.6	55311.2	55315	-4.7852	-3.3702	-3.766	-1.1512	0.0468	-1.789	-4.9031
55310.2	55311.6	55311.2	55314.9	-4.7842	-3.3702	-3.7656	-1.1502	0.0468	-1.7886	-4.9333
55310.1	55311.5	55311.1	55314.9	-4.7866	-3.3722	-3.7668	-1.1526	0.0448	-1.7898	-4.9641
55310.1	55311.5	55311.1	55314.9	-4.7902	-3.3752	-3.7678	-1.1562	0.0418	-1.7908	-4.9951
55310.1	55311.5	55311.1	55314.9	-4.7916	-3.3772	-3.7678	-1.1576	0.0398	-1.7908	-5.0241
55310	55311.4	55311.1	55314.8	-4.7926	-3.3768	-3.7686	-1.1586	0.0402	-1.7916	-5.0513
55310	55311.4	55311	55314.8	-4.7928	-3.3758	-3.77	-1.1588	0.0412	-1.793	-5.0757
55310	55311.4	55311	55314.8	-4.7936	-3.3746	-3.7702	-1.1596	0.0424	-1.7932	-5.0981
55310	55311.4	55311	55314.8	-4.793	-3.3724	-3.768	-1.159	0.0446	-1.791	-5.1175
55310	55311.4	55311	55314.7	-4.7906	-3.369	-3.7666	-1.1566	0.048	-1.7896	-5.1335
55309.9	55311.4	55311	55314.7	-4.7874	-3.367	-3.767	-1.1534	0.05	-1.79	-5.1471
55309.9	55311.3	55310.9	55314.7	-4.7864	-3.3684	-3.7654	-1.1524	0.0486	-1.7884	-5.1625
55309.9	55311.3	55310.9	55314.7	-4.787	-3.3712	-3.7606	-1.153	0.0458	-1.7836	-5.1809
55309.9	55311.3	55310.9	55314.7	-4.787	-3.372	-3.7562	-1.153	0.045	-1.7792	-5.1999
55309.9	55311.3	55310.9	55314.7	-4.7862	-3.3724	-3.7574	-1.1522	0.0446	-1.7804	-5.2177
55309.8	55311.3	55310.9	55314.6	-4.7862	-3.3734	-3.763	-1.1522	0.0436	-1.786	-5.2357
55309.8	55311.2	55310.8	55314.6	-4.7874	-3.3732	-3.7664	-1.1534	0.0438	-1.7894	-5.2565
55309.8	55311.2	55310.8	55314.6	-4.7906	-3.3724	-3.7678	-1.1566	0.0446	-1.7908	-5.2819
55309.8	55311.2	55310.8	55314.6	-4.7922	-3.3714	-3.7678	-1.1582	0.0456	-1.7908	-5.3091
55309.7	55311.2	55310.8	55314.5	-4.7924	-3.3732	-3.7668	-1.1584	0.0438	-1.7898	-5.3363
55309.7	55311.1	55310.7	55314.5	-4.7924	-3.3756	-3.7644	-1.1584	0.0414	-1.7874	-5.3641
55309.7	55311.1	55310.7	55314.5	-4.7906	-3.3752	-3.762	-1.1566	0.0418	-1.785	-5.3909
55309.7	55311.1	55310.7	55314.5	-4.7888	-3.3724	-3.7626	-1.1548	0.0446	-1.7856	-5.4179
55309.6	55311.1	55310.7	55314.4	-4.7888	-3.3708	-3.7658	-1.1548	0.0462	-1.7888	-5.4459
55309.6	55311	55310.6	55314.4	-4.7892	-3.3718	-3.768	-1.1552	0.0452	-1.791	-5.4741
55309.6	55311	55310.6	55314.4	-4.7902	-3.3734	-3.7682	-1.1562	0.0436	-1.7912	-5.5033
55309.6	55311	55310.6	55314.3	-4.7912	-3.3726	-3.7678	-1.1572	0.0444	-1.7908	-5.5337
55309.5	55310.9	55310.5	55314.3	-4.7918	-3.371	-3.7662	-1.1578	0.046	-1.7892	-5.5637
55309.5	55310.9	55310.5	55314.3	-4.7932	-3.371	-3.7644	-1.1592	0.046	-1.7874	-5.5929
55309.5	55310.9	55310.5	55314.3	-4.7936	-3.3726	-3.7634	-1.1596	0.0444	-1.7864	-5.6199
55309.4	55310.9	55310.5	55314.2	-4.7914	-3.373	-3.7648	-1.1574	0.044	-1.7878	-5.6439
55309.4	55310.8	55310.4	55314.2	-4.7882	-3.372	-3.7672	-1.1542	0.045	-1.7902	-5.6667
55309.4	55310.8	55310.4	55314.2	-4.7866	-3.371	-3.767	-1.1526	0.046	-1.79	-5.6913
55309.4	55310.8	55310.4	55314.2	-4.7882	-3.3718	-3.7646	-1.1542	0.0452	-1.7876	-5.7193
55309.3	55310.8	55310.4	55314.1	-4.791	-3.3736	-3.763	-1.157	0.0434	-1.786	-5.7491
55309.3	55310.7	55310.3	55314.1	-4.793	-3.3748	-3.7646	-1.159	0.0422	-1.7876	-5.7785
55309.3	55310.7	55310.3	55314.1	-4.7944	-3.3752	-3.7676	-1.1604	0.0418	-1.7906	-5.8067
55309.3	55310.7	55310.3	55314	-4.794	-3.375	-3.7694	-1.16	0.042	-1.7924	-5.8335
55309.2	55310.6	55310.2	55314	-4.7898	-3.3718	-3.767	-1.1558	0.0452	-1.79	-5.8587
55309.2	55310.6	55310.2	55314	-4.7858	-3.3696	-3.764	-1.1518	0.0474	-1.787	-5.8835
55309.2	55310.6	55310.2	55314	-4.7878	-3.3712	-3.7644	-1.1538	0.0458	-1.7874	-5.9107
55309.1	55310.6	55310.2	55313.9	-4.793	-3.3758	-3.7676	-1.159	0.0412	-1.7906	-5.9371
55309.1	55310.5	55310.2	55313.9	-4.7962	-3.38	-3.7692	-1.1622	0.037	-1.7922	-5.9593
55309.1	55310.5	55310.1	55313.9	-4.7938	-3.3804	-3.7678	-1.1598	0.0366	-1.7908	-5.9761
55309.1	55310.5	55310.1	55313.9	-4.7922	-3.3794	-3.7668	-1.1582	0.0376	-1.7898	-5.9909
55309.1	55310.5	55310.1	55313.9	-4.7948	-3.3798	-3.7684	-1.1608	0.0372	-1.7914	-6.0047
55309.1	55310.5	55310.1	55313.9	-4.7972	-3.3806	-3.772	-1.1632	0.0364	-1.795	-6.0131
55309.1	55310.5	55310.1	55313.9	-4.7942	-3.38	-3.7744	-1.1602	0.037	-1.7974	-6.0129
55309.1	55310.5	55310.1	55313.9	-4.7902	-3.379	-3.7748	-1.1562	0.038	-1.7978	-6.0077
55309.1	55310.5	55310.1	55313.9	-4.7902	-3.378	-3.7736	-1.1562	0.039	-1.7966	-6.0009
55309.1	55310.5	55310.1	55313.9	-4.7938	-3.3778	-3.7718	-1.1598	0.0392	-1.7948	-5.9923
55309.1	55310.5	55310.1	55313.9	-4.7958	-3.3774	-3.7708	-1.1618	0.0396	-1.7938	-5.9797
55309.1	55310.5	55310.1	55313.9	-4.795	-3.3772	-3.7714	-1.161	0.0398	-1.7944	-5.9619
55309.1	55310.6	55310.2	55313.9	-4.7926	-3.3764	-3.7708	-1.1586	0.0406	-1.7938	-5.9403
55309.2	55310.6	55310.2	55314	-4.791	-3.3768	-3.7688	-1.157	0.0402	-1.7918	-5.9157
55309.2	55310.6	55310.2	55314	-4.7914	-3.3776	-3.769	-1.1574	0.0394	-1.792	-5.8893
55309.2	55310.6	55310.2	55314	-4.7934	-3.3792	-3.7724	-1.1594	0.0378	-1.7954	-5.8613
55309.3	55310.7	55310.3	55314	-4.7956	-3.3804	-3.7748	-1.1616	0.0366	-1.7978	-5.8325
55309.3	55310.7	55310.3	55314.1	-4.797	-3.3812	-3.7752	-1.163	0.0358	-1.7982	-5.8019
55309.3	55310.7	55310.3	55314.1	-4.797	-3.3814	-3.7736	-1.163	0.0356	-1.7966	-5.7697
55309.3	55310.8	55310.4	55314.1	-4.7972	-3.3826	-3.7728	-1.1632	0.0344	-1.7958	-5.7361
55309.4	55310.8	55310.4	55314.2	-4.798	-3.3838	-3.774	-1.164	0.0332	-1.797	-5.7025
55309.4	55310.8	55310.4	55314.2	-4.7964	-3.3832	-3.7744	-1.1624	0.0338	-1.7974	-5.6689
55309.4	55310.9	55310.5	55314.2	-4.7936	-3.3812	-3.7734	-1.1596	0.0358	-1.7964	-5.6363
55309.5	55310.9	55310.5	55314.3	-4.7928	-3.3814	-3.7728	-1.1588	0.0356	-1.7958	-5.6049
55309.5	55310.9	55310.5	55314.3	-4.7946	-3.3838	-3.7732	-1.1606	0.0332	-1.7962	-5.5741
55309.5	55311	55310.6	55314.3	-4.798	-3.3864	-3.7758	-1.164	0.0306	-1.7988	-5.5431
55309.6	55311	55310.6	55314.4	-4.801	-3.3876	-3.7782	-1.167	0.0294	-1.8012	-5.5129
55309.6	55311	55310.6	55314.4	-4.8006	-3.3854	-3.7784	-1.1666	0.0316	-1.8014	-5.4831
55309.6	55311	55310.7	55314.4	-4.7982	-3.3814	-3.777	-1.1642	0.0356	-1.8	-5.4543
55309.7	55311.1	55310.7	55314.5	-4.7952	-3.3786	-3.7746	-1.1612	0.0384	-1.7976	-5.4261
55309.7	55311.1	55310.7	55314.5	-4.7932	-3.3776	-3.7734	-1.1592	0.0394	-1.7964	-5.3983
55309.7	55311.1	55310.7	55314.5	-4.7926	-3.3766	-3.7704	-1.1586	0.0404	-1.7934	-5.3723
55309.7	55311.2	55310.8	55314.5	-4.7926	-3.3764	-3.7682	-1.1586	0.0406	-1.7912	-5.3469
55309.8	55311.2	55310.8	55314.6	-4.7946	-3.3792	-3.77	-1.1606	0.0378	-1.793	-5.3223
55309.8	55311.2	55310.8	55314.6	-4.799	-3.385	-3.7748	-1.165	0.032	-1.7978	-5.2993
55309.8	55311.2	55310.8	55314.6	-4.801	-3.3882	-3.7774	-1.167	0.0288	-1.8004	-5.2765
55309.8	55311.2	55310.9	55314.6	-4.8012	-3.3866	-3.7766	-1.1672	0.0304	-1.7996	-5.2541
55309.9	55311.3	55310.9	55314.7	-4.799	-3.3806	-3.7728	-1.165	0.0364	-1.7958	-5.2317
55309.9	55311.3	55310.9	55314.7	-4.7964	-3.3774	-3.7706	-1.1624	0.0396	-1.7936	-5.2083
55309.9	55311.3	55310.9	55314.7	-4.7944	-3.3788	-3.7696	-1.1604	0.0382	-1.7926	-5.1845
55309.9	55311.3	55310.9	55314.7	-4.793	-3.3832	-3.77	-1.159	0.0338	-1.793	-5.1595
55309.9	55311.4	55311	55314.7	-4.7934	-3.3874	-3.7716	-1.1594	0.0296	-1.7946	-5.1355
55310	55311.4	55311	55314.8	-4.7962	-3.3878	-3.7732	-1.1622	0.0292	-1.7962	-5.1153
55310	55311.4	55311	55314.8	-4.7978	-3.384	-3.7744	-1.1638	0.033	-1.7974	-5.0967
55310	55311.4	55311	55314.8	-4.7992	-3.3824	-3.7754	-1.1652	0.0346	-1.7984	-5.0791
55310	55311.4	55311	55314.8	-4.7994	-3.3826	-3.7754	-1.1654	0.0344	-1.7984	-5.0611
55310	55311.5	55311.1	55314.8	-4.7984	-3.3844	-3.7742	-1.1644	0.0326	-1.7972	-5.0427
55310.1	55311.5	55311.1	55314.9	-4.7978	-3.3852	-3.7732	-1.1638	0.0318	-1.7962	-5.0265
55310.1	55311.5	55311.1	55314.9	-4.7976	-3.384	-3.7732	-1.1636	0.033	-1.7962	-5.0125
55310.1	55311.5	55311.1	55314.9	-4.7986	-3.3828	-3.7736	-1.1646	0.0342	-1.7966	-5.0013
55310.1	55311.5	55311.1	55314.9	-4.7996	-3.3826	-3.7742	-1.1656	0.0344	-1.7972	-4.9909
55310.1	55311.5	55311.1	55314.9	-4.798	-3.382	-3.774	-1.164	0.035	-1.797	-4.9801
55310.1	55311.5	55311.1	55314.9	-4.795	-3.3832	-3.7744	-1.161	0.0338	-1.7974	-4.9693
55310.1	55311.5	55311.1	55314.9	-4.7928	-3.3854	-3.7752	-1.1588	0.0316	-1.7982	-4.9597
55310.1	55311.5	55311.2	55314.9	-4.7934	-3.3864	-3.7754	-1.1594	0.0306	-1.7984	-4.9527
55310.1	55311.5	55311.2	55314.9	-4.797	-3.3858	-3.7758	-1.163	0.0312	-1.7988	-4.9481
55310.1	55311.6	55311.2	55314.9	-4.7998	-3.3848	-3.7752	-1.1658	0.0322	-1.7982	-4.9435
55310.1	55311.6	55311.2	55314.9	-4.8012	-3.3866	-3.774	-1.1672	0.0304	-1.797	-4.9373
55310.2	55311.6	55311.2	55315	-4.8024	-3.39	-3.7742	-1.1684	0.027	-1.7972	-4.9303
55310.2	55311.6	55311.2	55315	-4.8036	-3.3906	-3.7748	-1.1696	0.0264	-1.7978	-4.9243
55310.2	55311.6	55311.2	55315	-4.8036	-3.3892	-3.7766	-1.1696	0.0278	-1.7996	-4.9185
55310.2	55311.6	55311.2	55315	-4.8	-3.387	-3.7778	-1.166	0.03	-1.8008	-4.9107
55310.2	55311.6	55311.2	55315	-4.7936	-3.384	-3.777	-1.1596	0.033	-1.8	-4.9017
55310.2	55311.6	55311.2	55315	-4.7908	-3.3816	-3.7762	-1.1568	0.0354	-1.7992	-4.8963
55310.2	55311.6	55311.2	55315	-4.7924	-3.3814	-3.7756	-1.1584	0.0356	-1.7986	-4.8957
55310.2	55311.6	55311.2	55315	-4.7972	-3.3842	-3.7758	-1.1632	0.0328	-1.7988	-4.8977
55310.2	55311.6	55311.2	55315	-4.7994	-3.3864	-3.7758	-1.1654	0.0306	-1.7988	-4.8991
55310.2	55311.6	55311.2	55315	-4.7988	-3.3858	-3.7762	-1.1648	0.0312	-1.7992	-4.8999
55310.2	55311.6	55311.2	55315	-4.7978	-3.3848	-3.7784	-1.1638	0.0322	-1.8014	-4.9013
55310.2	55311.6	55311.2	55315	-4.7986	-3.3854	-3.7788	-1.1646	0.0316	-1.8018	-4.9059
55310.2	55311.6	55311.2	55315	-4.7992	-3.3858	-3.7768	-1.1652	0.0312	-1.7998	-4.9131
55310.2	55311.6	55311.2	55315	-4.7984	-3.3848	-3.7748	-1.1644	0.0322	-1.7978	-4.9211
55310.2	55311.6	55311.2	55315	-4.7988	-3.3838	-3.776	-1.1648	0.0332	-1.799	-4.9297
55310.1	55311.6	55311.2	55314.9	-4.7998	-3.3836	-3.7794	-1.1658	0.0334	-1.8024	-4.9375
55310.1	55311.6	55311.2	55314.9	-4.7992	-3.3844	-3.7812	-1.1652	0.0326	-1.8042	-4.9443
55310.1	55311.5	55311.2	55314.9	-4.7982	-3.386	-3.781	-1.1642	0.031	-1.804	-4.9523
55310.1	55311.5	55311.1	55314.9	-4.7968	-3.3866	-3.7792	-1.1628	0.0304	-1.8022	-4.9611
55310.1	55311.5	55311.1	55314.9	-4.7964	-3.3884	-3.7788	-1.1624	0.0286	-1.8018	-4.9701
55310.1	55311.5	55311.1	55314.9	-4.7978	-3.3896	-3.7794	-1.1638	0.0274	-1.8024	-4.9795
55310.1	55311.5	55311.1	55314.9	-4.7974	-3.3888	-3.779	-1.1634	0.0282	-1.802	-4.9877
55310.1	55311.5	55311.1	55314.9	-4.7986	-3.3882	-3.779	-1.1646	0.0288	-1.802	-4.9969
55310.1	55311.5	55311.1	55314.9	-4.8008	-3.388	-3.779	-1.1668	0.029	-1.802	-5.0069
55310.1	55311.5	55311.1	55314.9	-4.8016	-3.3886	-3.7804	-1.1676	0.0284	-1.8034	-5.0153
55310.1	55311.5	55311.1	55314.9	-4.8006	-3.389	-3.7828	-1.1666	0.028	-1.8058	-5.0219
55310.1	55311.5	55311.1	55314.9	-4.8002	-3.3888	-3.7836	-1.1662	0.0282	-1.8066	-5.0281
55310.1	55311.5	55311.1	55314.9	-4.8008	-3.3894	-3.7826	-1.1668	0.0276	-1.8056	-5.0347
55310	55311.5	55311.1	55314.8	-4.801	-3.389	-3.7814	-1.167	0.028	-1.8044	-5.0409
55310	55311.5	55311.1	55314.8	-4.7984	-3.3868	-3.7814	-1.1644	0.0302	-1.8044	-5.0445
55310	55311.5	55311.1	55314.8	-4.7958	-3.3838	-3.7818	-1.1618	0.0332	-1.8048	-5.0469
55310	55311.4	55311	55314.8	-4.7964	-3.3838	-3.7824	-1.1624	0.0332	-1.8054	-5.0505
55310	55311.4	55311	55314.8	-4.7992	-3.386	-3.7818	-1.1652	0.031	-1.8048	-5.0559
55310	55311.4	55311	55314.8	-4.7994	-3.3868	-3.7812	-1.1654	0.0302	-1.8042	-5.0595
55310	55311.4	55311	55314.8	-4.7988	-3.3866	-3.7826	-1.1648	0.0304	-1.8056	-5.0609
55310	55311.4	55311	55314.8	-4.8008	-3.3864	-3.7838	-1.1668	0.0306	-1.8068	-5.0629
55310	55311.4	55311	55314.8	-4.8026	-3.3866	-3.7834	-1.1686	0.0304	-1.8064	-5.0649
55310	55311.4	55311	55314.8	-4.802	-3.3882	-3.7834	-1.168	0.0288	-1.8064	-5.0653
55310	55311.4	55311	55314.8	-4.7988	-3.3898	-3.7834	-1.1648	0.0272	-1.8064	-5.0627
55310	55311.4	55311	55314.8	-4.7944	-3.39	-3.7826	-1.1604	0.027	-1.8056	-5.0575
55310	55311.4	55311	55314.8	-4.7922	-3.3884	-3.779	-1.1582	0.0286	-1.802	-5.0535
55310	55311.4	55311.1	55314.8	-4.794	-3.3874	-3.7766	-1.16	0.0296	-1.7996	-5.0517
55310	55311.4	55311.1	55314.8	-4.7986	-3.3868	-3.7786	-1.1646	0.0302	-1.8016	-5.0523
55310	55311.4	55311.1	55314.8	-4.8022	-3.3868	-3.7822	-1.1682	0.0302	-1.8052	-5.0529
55310	55311.5	55311.1	55314.8	-4.801	-3.3858	-3.7832	-1.167	0.0312	-1.8062	-5.0505
55310	55311.5	55311.1	55314.8	-4.7982	-3.3854	-3.7822	-1.1642	0.0316	-1.8052	-5.0463
55310	55311.5	55311.1	55314.8	-4.7976	-3.3866	-3.7834	-1.1636	0.0304	-1.8064	-5.0425
55310	55311.5	55311.1	55314.8	-4.7976	-3.388	-3.7852	-1.1636	0.029	-1.8082	-5.0391
55310	55311.5	55311.1	55314.8	-4.797	-3.388	-3.7842	-1.163	0.029	-1.8072	-5.0365
55310.1	55311.5	55311.1	55314.8	-4.7976	-3.3876	-3.7798	-1.1636	0.0294	-1.8028	-5.0353
55310.1	55311.5	55311.1	55314.9	-4.7994	-3.3874	-3.7766	-1.1654	0.0296	-1.7996	-5.0339
55310.1	55311.5	55311.1	55314.9	-4.8008	-3.386	-3.7768	-1.1668	0.031	-1.7998	-5.0325
55310.1	55311.5	55311.1	55314.9	-4.7994	-3.3834	-3.7794	-1.1654	0.0336	-1.8024	-5.0303
55310.1	55311.5	55311.1	55314.9	-4.799	-3.3812	-3.7824	-1.165	0.0358	-1.8054	-5.0295
55310.1	55311.5	55311.1	55314.9	-4.8	-3.3816	-3.7842	-1.166	0.0354	-1.8072	-5.0283
55310.1	55311.5	55311.1	55314.9	-4.8	-3.385	-3.7834	-1.166	0.032	-1.8064	-5.0245
55310.1	55311.5	55311.1	55314.9	-4.7992	-3.3864	-3.7802	-1.1652	0.0306	-1.8032	-5.0211
55310.1	55311.5	55311.1	55314.9	-4.798	-3.3848	-3.7786	-1.164	0.0322	-1.8016	-5.0187
55310.1	55311.5	55311.1	55314.9	-4.7982	-3.3832	-3.7794	-1.1642	0.0338	-1.8024	-5.0173
55310.1	55311.5	55311.1	55314.9	-4.7986	-3.3844	-3.781	-1.1646	0.0326	-1.804	-5.0157
55310.1	55311.5	55311.1	55314.9	-4.7994	-3.3882	-3.7818	-1.1654	0.0288	-1.8048	-5.0137
55310.1	55311.5	55311.1	55314.9	-4.8	-3.3908	-3.7808	-1.166	0.0262	-1.8038	-5.0125
55310.1	55311.5	55311.1	55314.9	-4.8018	-3.3916	-3.7802	-1.1678	0.0254	-1.8032	-5.0127
55310.1	55311.5	55311.1	55314.9	-4.8034	-3.392	-3.7824	-1.1694	0.025	-1.8054	-5.0115
55310.1	55311.5	55311.1	55314.9	-4.8022	-3.3906	-3.7836	-1.1682	0.0264	-1.8066	-5.0081
55310.1	55311.5	55311.1	55314.9	-4.7984	-3.3874	-3.7826	-1.1644	0.0296	-1.8056	-5.0039
55310.1	55311.5	55311.1	55314.9	-4.7958	-3.384	-3.7798	-1.1618	0.033	-1.8028	-5.0017
55310.1	55311.5	55311.1	55314.9	-4.7956	-3.3834	-3.7778	-1.1616	0.0336	-1.8008	-5.0007
55310.1	55311.5	55311.1	55314.9	-4.7974	-3.3856	-3.7798	-1.1634	0.0314	-1.8028	-4.9993
55310.1	55311.5	55311.1	55314.9	-4.7986	-3.3878	-3.7838	-1.1646	0.0292	-1.8068	-4.9967
55310.1	55311.5	55311.1	55314.9	-4.801	-3.3888	-3.787	-1.167	0.0282	-1.81	-4.9955
55310.1	55311.5	55311.1	55314.9	-4.8034	-3.388	-3.788	-1.1694	0.029	-1.811	-4.9949
55310.1	55311.5	55311.1	55314.9	-4.8022	-3.3864	-3.7864	-1.1682	0.0306	-1.8094	-4.9923
55310.1	55311.5	55311.1	55314.9	-4.7994	-3.3852	-3.784	-1.1654	0.0318	-1.807	-4.9887
55310.1	55311.5	55311.1	55314.9	-4.797	-3.385	-3.7816	-1.163	0.032	-1.8046	-4.9857
55310.1	55311.5	55311.1	55314.9	-4.795	-3.385	-3.7788	-1.161	0.032	-1.8018	-4.9829
55310.1	55311.5	55311.1	55314.9	-4.7948	-3.3854	-3.777	-1.1608	0.0316	-1.8	-4.9811
55310.1	55311.5	55311.1	55314.9	-4.7962	-3.3858	-3.7766	-1.1622	0.0312	-1.7996	-4.9807
55310.1	55311.5	55311.1	55314.9	-4.8004	-3.3874	-3.7798	-1.1664	0.0296	-1.8028	-4.9811
55310.1	55311.5	55311.1	55314.9	-4.8044	-3.3894	-3.784	-1.1704	0.0276	-1.807	-4.9797
55310.1	55311.5	55311.1	55314.9	-4.8042	-3.3906	-3.786	-1.1702	0.0264	-1.809	-4.9753
55310.1	55311.5	55311.1	55314.9	-4.801	-3.3904	-3.7854	-1.167	0.0266	-1.8084	-4.9701
55310.1	55311.5	55311.1	55314.9	-4.7972	-3.3888	-3.7836	-1.1632	0.0282	-1.8066	-4.9663
55310.1	55311.5	55311.1	55314.9	-4.795	-3.3866	-3.7836	-1.161	0.0304	-1.8066	-4.9635
55310.1	55311.5	55311.1	55314.9	-4.7954	-3.387	-3.7846	-1.1614	0.03	-1.8076	-4.9619
55310.1	55311.5	55311.1	55314.9	-4.7966	-3.3888	-3.784	-1.1626	0.0282	-1.807	-4.9619
55310.1	55311.5	55311.1	55314.9	-4.7978	-3.3902	-3.782	-1.1638	0.0268	-1.805	-4.9633
55310.1	55311.5	55311.1	55314.9	-4.7994	-3.3904	-3.7816	-1.1654	0.0266	-1.8046	-4.9645
55310.1	55311.5	55311.1	55314.9	-4.7994	-3.3888	-3.783	-1.1654	0.0282	-1.806	-4.9643
55310.1	55311.5	55311.1	55314.9	-4.7972	-3.3874	-3.7834	-1.1632	0.0296	-1.8064	-4.9635
55310.1	55311.5	55311.1	55314.9	-4.7948	-3.3858	-3.7806	-1.1608	0.0312	-1.8036	-4.9647
55310.1	55311.5	55311.1	55314.9	-4.796	-3.385	-3.778	-1.162	0.032	-1.801	-4.9687
55310.1	55311.5	55311.1	55314.9	-4.7978	-3.3848	-3.7784	-1.1638	0.0322	-1.8014	-4.9715
55310.1	55311.5	55311.1	55314.9	-4.7986	-3.3848	-3.7808	-1.1646	0.0322	-1.8038	-4.9725
55310.1	55311.5	55311.1	55314.9	-4.7988	-3.3848	-3.7812	-1.1648	0.0322	-1.8042	-4.9739
55310.1	55311.5	55311.1	55314.9	-4.7988	-3.3844	-3.7802	-1.1648	0.0326	-1.8032	-4.9759
55310.1	55311.5	55311.1	55314.9	-4.7964	-3.3832	-3.7778	-1.1624	0.0338	-1.8008	-4.9769
55310.1	55311.5	55311.1	55314.9	-4.7924	-3.381	-3.7762	-1.1584	0.036	-1.7992	-4.9769
55310.1	55311.5	55311.1	55314.9	-4.7896	-3.3792	-3.7768	-1.1556	0.0378	-1.7998	-4.9759
55310.1	55311.5	55311.1	55314.9	-4.7902	-3.3802	-3.779	-1.1562	0.0368	-1.802	-4.9751
55310.1	55311.5	55311.1	55314.9	-4.7936	-3.3842	-3.781	-1.1596	0.0328	-1.804	-4.9737
55310.1	55311.5	55311.1	55314.9	-4.7958	-3.3878	-3.7814	-1.1618	0.0292	-1.8044	-4.9701
55310.1	55311.5	55311.1	55314.9	-4.7956	-3.3888	-3.7796	-1.1616	0.0282	-1.8026	-4.9639
55310.1	55311.5	55311.1	55314.9	-4.7952	-3.3866	-3.7784	-1.1612	0.0304	-1.8014	-4.9565
55310.1	55311.5	55311.2	55314.9	-4.7948	-3.3852	-3.778	-1.1608	0.0318	-1.801	-4.9481
55310.1	55311.6	55311.2	55314.9	-4.796	-3.3862	-3.7792	-1.162	0.0308	-1.8022	-4.9401
55310.2	55311.6	55311.2	55314.9	-4.7958	-3.3862	-3.779	-1.1618	0.0308	-1.802	-4.9323
55310.2	55311.6	55311.2	55315	-4.7944	-3.384	-3.7778	-1.1604	0.033	-1.8008	-4.9255
55310.2	55311.6	55311.2	55315	-4.7934	-3.3818	-3.7768	-1.1594	0.0352	-1.7998	-4.9209
55310.2	55311.6	55311.2	55315	-4.7934	-3.382	-3.7764	-1.1594	0.035	-1.7994	-4.9189
55310.2	55311.6	55311.2	55315	-4.7942	-3.3846	-3.7758	-1.1602	0.0324	-1.7988	-4.9187
55310.2	55311.6	55311.2	55315	-4.7958	-3.3866	-3.7768	-1.1618	0.0304	-1.7998	-4.9195
55310.2	55311.6	55311.2	55315	-4.7972	-3.3852	-3.7776	-1.1632	0.0318	-1.8006	-4.9215
55310.2	55311.6	55311.2	55315	-4.798	-3.3836	-3.7798	-1.164	0.0334	-1.8028	-4.9247
55310.2	55311.6	55311.2	55315	-4.7968	-3.3826	-3.7812	-1.1628	0.0344	-1.8042	-4.9295
55310.1	55311.6	55311.2	55314.9	-4.7944	-3.3812	-3.779	-1.1604	0.0358	-1.802	-4.9361
55310.1	55311.6	55311.2	55314.9	-4.7912	-3.38	-3.7756	-1.1572	0.037	-1.7986	-4.9421
55310.1	55311.5	55311.2	55314.9	-4.79	-3.3804	-3.7742	-1.156	0.0366	-1.7972	-4.9479
55310.1	55311.5	55311.1	55314.9	-4.7922	-3.3824	-3.776	-1.1582	0.0346	-1.799	-4.9543
55310.1	55311.5	55311.1	55314.9	-4.7956	-3.3846	-3.778	-1.1616	0.0324	-1.801	-4.9611
55310.1	55311.5	55311.1	55314.9	-4.7974	-3.3842	-3.7772	-1.1634	0.0328	-1.8002	-4.9669
55310.1	55311.5	55311.1	55314.9	-4.7958	-3.3812	-3.776	-1.1618	0.0358	-1.799	-4.9675
55310.1	55311.5	55311.1	55314.9	-4.794	-3.3798	-3.777	-1.16	0.0372	-1.8	-4.9635
55310.1	55311.5	55311.1	55314.9	-4.7924	-3.3796	-3.7778	-1.1584	0.0374	-1.8008	-4.9557
55310.1	55311.6	55311.2	55314.9	-4.7906	-3.3796	-3.776	-1.1566	0.0374	-1.799	-4.9451
55310.2	55311.6	55311.2	55314.9	-4.789	-3.379	-3.7716	-1.155	0.038	-1.7946	-4.9337
55310.2	55311.6	55311.2	55315	-4.7916	-3.3796	-3.7708	-1.1576	0.0374	-1.7938	-4.9237
55310.2	55311.6	55311.2	55315	-4.7952	-3.3814	-3.774	-1.1612	0.0356	-1.797	-4.9141
55310.2	55311.6	55311.2	55315	-4.7968	-3.383	-3.776	-1.1628	0.034	-1.799	-4.9051
55310.2	55311.6	55311.2	55315	-4.795	-3.3824	-3.7744	-1.161	0.0346	-1.7974	-4.8967
55310.2	55311.6	55311.2	55315	-4.792	-3.3806	-3.7714	-1.158	0.0364	-1.7944	-4.8899
55310.2	55311.6	55311.2	55315	-4.79	-3.3782	-3.769	-1.156	0.0388	-1.792	-4.8851
55310.2	55311.6	55311.2	55315	-4.7898	-3.3776	-3.7704	-1.1558	0.0394	-1.7934	-4.8811
55310.2	55311.6	55311.2	55315	-4.7892	-3.3784	-3.7736	-1.1552	0.0386	-1.7966	-4.8775
55310.2	55311.6	55311.2	55315	-4.791	-3.3792	-3.7766	-1.157	0.0378	-1.7996	-4.8769
55310.2	55311.6	55311.2	55315	-4.7924	-3.3788	-3.778	-1.1584	0.0382	-1.801	-4.8767
55310.2	55311.6	55311.2	55315	-4.7916	-3.377	-3.777	-1.1576	0.04	-1.8	-4.8751
55310.2	55311.6	55311.2	55315	-4.7898	-3.3762	-3.775	-1.1558	0.0408	-1.798	-4.8727
55310.2	55311.6	55311.2	55315	-4.7892	-3.3772	-3.7736	-1.1552	0.0398	-1.7966	-4.8719
55310.2	55311.6	55311.2	55315	-4.7898	-3.3776	-3.7722	-1.1558	0.0394	-1.7952	-4.8721
55310.2	55311.6	55311.2	55315	-4.791	-3.3766	-3.7708	-1.157	0.0404	-1.7938	-4.8715
55310.2	55311.6	55311.2	55315	-4.7898	-3.374	-3.7692	-1.1558	0.043	-1.7922	-4.8669
55310.2	55311.6	55311.2	55315	-4.7886	-3.3722	-3.7682	-1.1546	0.0448	-1.7912	-4.8595
55310.2	55311.6	55311.3	55315	-4.788	-3.3728	-3.769	-1.154	0.0442	-1.792	-4.8509
55310.2	55311.7	55311.3	55315	-4.7896	-3.376	-3.7702	-1.1556	0.041	-1.7932	-4.8431
55310.2	55311.7	55311.3	55315	-4.7924	-3.3794	-3.7722	-1.1584	0.0376	-1.7952	-4.8355
55310.3	55311.7	55311.3	55315.1	-4.7922	-3.3798	-3.7734	-1.1582	0.0372	-1.7964	-4.8265
55310.3	55311.7	55311.3	55315.1	-4.7892	-3.3788	-3.7728	-1.1552	0.0382	-1.7958	-4.8163
55310.3	55311.7	55311.3	55315.1	-4.7854	-3.3782	-3.7706	-1.1514	0.0388	-1.7936	-4.8069
55310.3	55311.7	55311.3	55315.1	-4.784	-3.3768	-3.7678	-1.15	0.0402	-1.7908	-4.8015
55310.3	55311.7	55311.3	55315.1	-4.7864	-3.3754	-3.7672	-1.1524	0.0416	-1.7902	-4.8009
55310.3	55311.7	55311.3	55315.1	-4.7892	-3.3756	-3.77	-1.1552	0.0414	-1.793	-4.8029
55310.3	55311.7	55311.3	55315.1	-4.7912	-3.379	-3.7736	-1.1572	0.038	-1.7966	-4.8067
55310.3	55311.7	55311.3	55315.1	-4.7908	-3.3818	-3.7746	-1.1568	0.0352	-1.7976	-4.8119
55310.3	55311.7	55311.3	55315.1	-4.787	-3.3804	-3.7704	-1.153	0.0366	-1.7934	-4.8201
55310.3	55311.7	55311.3	55315	-4.7842	-3.3774	-3.7656	-1.1502	0.0396	-1.7886	-4.8337
55310.2	55311.6	55311.3	55315	-4.7848	-3.3758	-3.7646	-1.1508	0.0412	-1.7876	-4.8523
55310.2	55311.6	55311.2	55315	-4.7886	-3.3764	-3.767	-1.1546	0.0406	-1.79	-4.8739
55310.2	55311.6	55311.2	55315	-4.7934	-3.3772	-3.7702	-1.1594	0.0398	-1.7932	-4.8959
55310.2	55311.6	55311.2	55315	-4.795	-3.3764	-3.7716	-1.161	0.0406	-1.7946	-4.9167
55310.1	55311.6	55311.2	55314.9	-4.792	-3.375	-3.7702	-1.158	0.042	-1.7932	-4.9361
55310.1	55311.5	55311.1	55314.9	-4.7884	-3.3758	-3.7698	-1.1544	0.0412	-1.7928	-4.9547
55310.1	55311.5	55311.1	55314.9	-4.7862	-3.3762	-3.7698	-1.1522	0.0408	-1.7928	-4.9747
55310.1	55311.5	55311.1	55314.9	-4.7874	-3.3768	-3.7708	-1.1534	0.0402	-1.7938	-4.9967
55310.1	55311.5	55311.1	55314.9	-4.7908	-3.3776	-3.7722	-1.1568	0.0394	-1.7952	-5.0201
55310	55311.5	55311.1	55314.8	-4.7914	-3.3774	-3.7728	-1.1574	0.0396	-1.7958	-5.0425
55310	55311.4	55311	55314.8	-4.7898	-3.3756	-3.7714	-1.1558	0.0414	-1.7944	-5.0639
55310	55311.4	55311	55314.8	-4.7872	-3.3716	-3.7678	-1.1532	0.0454	-1.7908	-5.0841
55310	55311.4	55311	55314.8	-4.7866	-3.369	-3.7644	-1.1526	0.048	-1.7874	-5.1047
55310	55311.4	55311	55314.7	-4.7884	-3.3724	-3.764	-1.1544	0.0446	-1.787	-5.1253
55309.9	55311.4	55311	55314.7	-4.7904	-3.3782	-3.766	-1.1564	0.0388	-1.789	-5.1459
55309.9	55311.3	55310.9	55314.7	-4.7906	-3.3806	-3.768	-1.1566	0.0364	-1.791	-5.1655
55309.9	55311.3	55310.9	55314.7	-4.7886	-3.3778	-3.7678	-1.1546	0.0392	-1.7908	-5.1829
55309.9	55311.3	55310.9	55314.7	-4.7852	-3.373	-3.767	-1.1512	0.044	-1.79	-5.1983
55309.9	55311.3	55310.9	55314.7	-4.7836	-3.3716	-3.7666	-1.1496	0.0454	-1.7896	-5.2143
55309.9	55311.3	55310.9	55314.6	-4.7856	-3.3744	-3.767	-1.1516	0.0426	-1.79	-5.2309
55309.8	55311.3	55310.9	55314.6	-4.7888	-3.3768	-3.769	-1.1548	0.0402	-1.792	-5.2465
55309.8	55311.2	55310.8	55314.6	-4.7904	-3.3762	-3.7698	-1.1564	0.0408	-1.7928	-5.2595
55309.8	55311.2	55310.8	55314.6	-4.7896	-3.3732	-3.7674	-1.1556	0.0438	-1.7904	-5.2695
55309.8	55311.2	55310.8	55314.6	-4.7872	-3.3712	-3.7648	-1.1532	0.0458	-1.7878	-5.2761
55309.8	55311.2	55310.8	55314.6	-4.7856	-3.3712	-3.765	-1.1516	0.0458	-1.788	-5.2801
55309.8	55311.2	55310.8	55314.6	-4.7842	-3.3704	-3.766	-1.1502	0.0466	-1.789	-5.2831
55309.8	55311.2	55310.8	55314.6	-4.7848	-3.3708	-3.767	-1.1508	0.0462	-1.79	-5.2857
55309.8	55311.2	55310.8	55314.6	-4.7872	-3.3734	-3.768	-1.1532	0.0436	-1.791	-5.2871
55309.8	55311.2	55310.8	55314.6	-4.7882	-3.3752	-3.7688	-1.1542	0.0418	-1.7918	-5.2865
55309.8	55311.2	55310.8	55314.6	-4.7868	-3.3742	-3.7694	-1.1528	0.0428	-1.7924	-5.2833
55309.8	55311.2	55310.8	55314.6	-4.7846	-3.371	-3.768	-1.1506	0.046	-1.791	-5.2789
55309.8	55311.2	55310.8	55314.6	-4.783	-3.3684	-3.7638	-1.149	0.0486	-1.7868	-5.2733
55309.8	55311.2	55310.8	55314.6	-4.7836	-3.3682	-3.7598	-1.1496	0.0488	-1.7828	-5.2669
55309.8	55311.2	55310.9	55314.6	-4.785	-3.369	-3.7588	-1.151	0.048	-1.7818	-5.2595
55309.8	55311.3	55310.9	55314.6	-4.7858	-3.3708	-3.763	-1.1518	0.0462	-1.786	-5.2493
55309.8	55311.3	55310.9	55314.6	-4.7854	-3.373	-3.7678	-1.1514	0.044	-1.7908	-5.2377
55309.9	55311.3	55310.9	55314.6	-4.7842	-3.3738	-3.7682	-1.1502	0.0432	-1.7912	-5.2271
55309.9	55311.3	55310.9	55314.7	-4.7848	-3.3728	-3.766	-1.1508	0.0442	-1.789	-5.2189
55309.9	55311.3	55310.9	55314.7	-4.7878	-3.372	-3.7642	-1.1538	0.045	-1.7872	-5.2117
55309.9	55311.3	55310.9	55314.7	-4.7898	-3.3734	-3.7644	-1.1558	0.0436	-1.7874	-5.2015
55309.9	55311.3	55310.9	55314.7	-4.7884	-3.375	-3.7648	-1.1544	0.042	-1.7878	-5.1885
55309.9	55311.3	55310.9	55314.7	-4.7838	-3.3744	-3.7626	-1.1498	0.0426	-1.7856	-5.1745
55309.9	55311.3	55310.9	55314.7	-4.7818	-3.3722	-3.7616	-1.1478	0.0448	-1.7846	-5.1623
55309.9	55311.3	55311	55314.7	-4.7824	-3.3708	-3.7618	-1.1484	0.0462	-1.7848	-5.1513
55309.9	55311.4	55311	55314.7	-4.7822	-3.3708	-3.7612	-1.1482	0.0462	-1.7842	-5.1395
55310	55311.4	55311	55314.7	-4.7812	-3.3716	-3.7622	-1.1472	0.0454	-1.7852	-5.1271
55310	55311.4	55311	55314.8	-4.7818	-3.373	-3.7648	-1.1478	0.044	-1.7878	-5.1159
55310	55311.4	55311	55314.8	-4.7854	-3.374	-3.7666	-1.1514	0.043	-1.7896	-5.1071
55310	55311.4	55311	55314.8	-4.7886	-3.3744	-3.7674	-1.1546	0.0426	-1.7904	-5.0979
55310	55311.4	55311	55314.8	-4.7874	-3.3736	-3.7668	-1.1534	0.0434	-1.7898	-5.0859
55310	55311.4	55311	55314.8	-4.7852	-3.3718	-3.7654	-1.1512	0.0452	-1.7884	-5.0741
55310	55311.4	55311	55314.8	-4.7836	-3.3702	-3.7644	-1.1496	0.0468	-1.7874	-5.0627
55310	55311.4	55311.1	55314.8	-4.7844	-3.3708	-3.7648	-1.1504	0.0462	-1.7878	-5.0517
55310	55311.5	55311.1	55314.8	-4.7854	-3.373	-3.7656	-1.1514	0.044	-1.7886	-5.0399
55310.1	55311.5	55311.1	55314.8	-4.7846	-3.3738	-3.7656	-1.1506	0.0432	-1.7886	-5.0271
55310.1	55311.5	55311.1	55314.9	-4.7836	-3.372	-3.7634	-1.1496	0.045	-1.7864	-5.0149
55310.1	55311.5	55311.1	55314.9	-4.7848	-3.371	-3.7616	-1.1508	0.046	-1.7846	-5.0027
55310.1	55311.5	55311.1	55314.9	-4.7854	-3.3716	-3.7622	-1.1514	0.0454	-1.7852	-4.9877
55310.1	55311.5	55311.1	55314.9	-4.7854	-3.3748	-3.766	-1.1514	0.0422	-1.789	-4.9711
55310.1	55311.5	55311.1	55314.9	-4.7836	-3.376	-3.7692	-1.1496	0.041	-1.7922	-4.9549
55310.1	55311.6	55311.2	55314.9	-4.7832	-3.3744	-3.769	-1.1492	0.0426	-1.792	-4.9433
55310.1	55311.6	55311.2	55314.9	-4.7828	-3.3718	-3.764	-1.1488	0.0452	-1.787	-4.9361
55310.2	55311.6	55311.2	55314.9	-4.7822	-3.3702	-3.759	-1.1482	0.0468	-1.782	-4.9309
55310.2	55311.6	55311.2	55314.9	-4.7814	-3.3706	-3.7596	-1.1474	0.0464	-1.7826	-4.9259
55310.2	55311.6	55311.2	55314.9	-4.782	-3.3726	-3.7636	-1.148	0.0444	-1.7866	-4.9227
55310.2	55311.6	55311.2	55314.9	-4.7838	-3.3734	-3.7646	-1.1498	0.0436	-1.7876	-4.9227
55310.2	55311.6	55311.2	55314.9	-4.785	-3.3732	-3.7628	-1.151	0.0438	-1.7858	-4.9243
55310.2	55311.6	55311.2	55314.9	-4.7854	-3.3734	-3.7632	-1.1514	0.0436	-1.7862	-4.9251
55310.2	55311.6	55311.2	55314.9	-4.7842	-3.3726	-3.7656	-1.1502	0.0444	-1.7886	-4.9241
55310.2	55311.6	55311.2	55314.9	-4.7804	-3.3716	-3.7656	-1.1464	0.0454	-1.7886	-4.9213
55310.2	55311.6	55311.2	55314.9	-4.7784	-3.3718	-3.7636	-1.1444	0.0452	-1.7866	-4.9191
55310.2	55311.6	55311.2	55314.9	-4.7828	-3.373	-3.765	-1.1488	0.044	-1.788	-4.9201
55310.2	55311.6	55311.2	55315	-4.7896	-3.3746	-3.7696	-1.1556	0.0424	-1.7926	-4.9215
55310.2	55311.6	55311.2	55315	-4.7924	-3.375	-3.7714	-1.1584	0.042	-1.7944	-4.9201
55310.2	55311.6	55311.2	55315	-4.7896	-3.3744	-3.7688	-1.1556	0.0426	-1.7918	-4.9151
55310.2	55311.6	55311.2	55315	-4.7856	-3.374	-3.766	-1.1516	0.043	-1.789	-4.9091
55310.2	55311.6	55311.2	55315	-4.7834	-3.374	-3.765	-1.1494	0.043	-1.788	-4.9035
55310.2	55311.6	55311.2	55315	-4.7832	-3.3756	-3.7652	-1.1492	0.0414	-1.7882	-4.8981
55310.2	55311.6	55311.2	55315	-4.7838	-3.3764	-3.7644	-1.1498	0.0406	-1.7874	-4.8929
55310.2	55311.6	55311.2	55315	-4.7846	-3.375	-3.7638	-1.1506	0.042	-1.7868	-4.8881
55310.2	55311.6	55311.2	55315	-4.7846	-3.3714	-3.7628	-1.1506	0.0456	-1.7858	-4.8839
55310.2	55311.6	55311.2	55315	-4.7838	-3.3688	-3.7622	-1.1498	0.0482	-1.7852	-4.8795
55310.2	55311.6	55311.2	55315	-4.7842	-3.3698	-3.7632	-1.1502	0.0472	-1.7862	-4.8755
55310.2	55311.6	55311.2	55315	-4.7848	-3.371	-3.765	-1.1508	0.046	-1.788	-4.8715
55310.2	55311.6	55311.2	55315	-4.7838	-3.3716	-3.767	-1.1498	0.0454	-1.79	-4.8661
55310.2	55311.6	55311.2	55315	-4.7828	-3.373	-3.7678	-1.1488	0.044	-1.7908	-4.8607
55310.2	55311.6	55311.2	55315	-4.783	-3.3748	-3.7674	-1.149	0.0422	-1.7904	-4.8561
55310.2	55311.6	55311.3	55315	-4.7848	-3.3768	-3.7678	-1.1508	0.0402	-1.7908	-4.8513
55310.2	55311.6	55311.3	55315	-4.7842	-3.375	-3.7652	-1.1502	0.042	-1.7882	-4.8453
55310.2	55311.7	55311.3	55315	-4.7822	-3.3724	-3.7624	-1.1482	0.0446	-1.7854	-4.8387
55310.3	55311.7	55311.3	55315	-4.7806	-3.3708	-3.761	-1.1466	0.0462	-1.784	-4.8327
55310.3	55311.7	55311.3	55315	-4.7818	-3.3708	-3.7616	-1.1478	0.0462	-1.7846	-4.8283
55310.3	55311.7	55311.3	55315	-4.7838	-3.371	-3.7644	-1.1498	0.046	-1.7874	-4.8239
55310.3	55311.7	55311.3	55315.1	-4.785	-3.3704	-3.7656	-1.151	0.0466	-1.7886	-4.8185
55310.3	55311.7	55311.3	55315.1	-4.7848	-3.369	-3.7636	-1.1508	0.048	-1.7866	-4.8117
55310.3	55311.7	55311.3	55315.1	-4.7838	-3.3684	-3.761	-1.1498	0.0486	-1.784	-4.8031
55310.3	55311.7	55311.3	55315.1	-4.7832	-3.37	-3.7602	-1.1492	0.047	-1.7832	-4.7939
55310.3	55311.7	55311.3	55315.1	-4.784	-3.3736	-3.7636	-1.15	0.0434	-1.7866	-4.7859
55310.3	55311.7	55311.3	55315.1	-4.7856	-3.3768	-3.7672	-1.1516	0.0402	-1.7902	-4.7797
55310.3	55311.7	55311.3	55315.1	-4.7874	-3.3776	-3.767	-1.1534	0.0394	-1.79	-4.7751
55310.3	55311.7	55311.3	55315.1	-4.7882	-3.3762	-3.7642	-1.1542	0.0408	-1.7872	-4.7691
55310.3	55311.7	55311.3	55315.1	-4.786	-3.3734	-3.7624	-1.152	0.0436	-1.7854	-4.7591
55310.3	55311.7	55311.4	55315.1	-4.7814	-3.3712	-3.7624	-1.1474	0.0458	-1.7854	-4.7461
55310.4	55311.8	55311.4	55315.1	-4.7786	-3.3706	-3.7636	-1.1446	0.0464	-1.7866	-4.7345
55310.4	55311.8	55311.4	55315.1	-4.7796	-3.3724	-3.7648	-1.1456	0.0446	-1.7878	-4.7263
55310.4	55311.8	55311.4	55315.1	-4.783	-3.3726	-3.7636	-1.149	0.0444	-1.7866	-4.7215
55310.4	55311.8	55311.4	55315.2	-4.7866	-3.3718	-3.763	-1.1526	0.0452	-1.786	-4.7167
55310.4	55311.8	55311.4	55315.2	-4.7874	-3.3728	-3.7632	-1.1534	0.0442	-1.7862	-4.7091
55310.4	55311.8	55311.4	55315.2	-4.7858	-3.3758	-3.764	-1.1518	0.0412	-1.787	-4.6989
55310.4	55311.8	55311.4	55315.2	-4.7844	-3.3782	-3.7648	-1.1504	0.0388	-1.7878	-4.6893
55310.4	55311.8	55311.4	55315.2	-4.7836	-3.3782	-3.764	-1.1496	0.0388	-1.787	-4.6823
55310.4	55311.8	55311.4	55315.2	-4.7844	-3.3756	-3.7626	-1.1504	0.0414	-1.7856	-4.6767
55310.4	55311.8	55311.4	55315.2	-4.7842	-3.3736	-3.7626	-1.1502	0.0434	-1.7856	-4.6679
55310.4	55311.8	55311.4	55315.2	-4.7844	-3.3732	-3.7624	-1.1504	0.0438	-1.7854	-4.6577
55310.4	55311.8	55311.5	55315.2	-4.7866	-3.3746	-3.7628	-1.1526	0.0424	-1.7858	-4.6491
55310.4	55311.9	55311.5	55315.2	-4.7884	-3.3764	-3.7642	-1.1544	0.0406	-1.7872	-4.6413
55310.5	55311.9	55311.5	55315.2	-4.7862	-3.3758	-3.7654	-1.1522	0.0412	-1.7884	-4.6309
55310.5	55311.9	55311.5	55315.2	-4.7822	-3.373	-3.767	-1.1482	0.044	-1.79	-4.6183
55310.5	55311.9	55311.5	55315.3	-4.7786	-3.3706	-3.7664	-1.1446	0.0464	-1.7894	-4.6065
55310.5	55311.9	55311.5	55315.3	-4.779	-3.372	-3.7638	-1.145	0.045	-1.7868	-4.5987
55310.5	55311.9	55311.5	55315.3	-4.781	-3.3748	-3.7612	-1.147	0.0422	-1.7842	-4.5925
55310.5	55311.9	55311.5	55315.3	-4.784	-3.3762	-3.7612	-1.15	0.0408	-1.7842	-4.5869
55310.5	55311.9	55311.5	55315.3	-4.7872	-3.3756	-3.7644	-1.1532	0.0414	-1.7874	-4.5817
55310.5	55311.9	55311.5	55315.3	-4.7908	-3.3758	-3.7684	-1.1568	0.0412	-1.7914	-4.5765
55310.5	55311.9	55311.5	55315.3	-4.7922	-3.3768	-3.77	-1.1582	0.0402	-1.793	-4.5701
55310.5	55311.9	55311.5	55315.3	-4.7898	-3.3768	-3.7672	-1.1558	0.0402	-1.7902	-4.5605
55310.5	55311.9	55311.6	55315.3	-4.786	-3.3754	-3.7644	-1.152	0.0416	-1.7874	-4.5495
55310.5	55312	55311.6	55315.3	-4.7824	-3.3728	-3.7632	-1.1484	0.0442	-1.7862	-4.5401
55310.6	55312	55311.6	55315.3	-4.7814	-3.3702	-3.7632	-1.1474	0.0468	-1.7862	-4.5335
55310.6	55312	55311.6	55315.3	-4.7822	-3.3684	-3.7628	-1.1482	0.0486	-1.7858	-4.5279
55310.6	55312	55311.6	55315.3	-4.783	-3.369	-3.7622	-1.149	0.048	-1.7852	-4.5211
55310.6	55312	55311.6	55315.4	-4.7852	-3.3736	-3.7646	-1.1512	0.0434	-1.7876	-4.5125
55310.6	55312	55311.6	55315.4	-4.788	-3.3798	-3.7692	-1.154	0.0372	-1.7922	-4.5045
55310.6	55312	55311.6	55315.4	-4.7886	-3.383	-3.7708	-1.1546	0.034	-1.7938	-4.4969
55310.6	55312	55311.6	55315.4	-4.7874	-3.3818	-3.768	-1.1534	0.0352	-1.791	-4.4913
55310.6	55312	55311.6	55315.4	-4.785	-3.3776	-3.7634	-1.151	0.0394	-1.7864	-4.4863
55310.6	55312	55311.6	55315.4	-4.7826	-3.373	-3.7614	-1.1486	0.044	-1.7844	-4.4795
55310.6	55312	55311.6	55315.4	-4.783	-3.3714	-3.7642	-1.149	0.0456	-1.7872	-4.4711
55310.6	55312	55311.6	55315.4	-4.7864	-3.374	-3.7682	-1.1524	0.043	-1.7912	-4.4641
55310.6	55312	55311.6	55315.4	-4.7898	-3.3776	-3.7688	-1.1558	0.0394	-1.7918	-4.4591
55310.6	55312	55311.7	55315.4	-4.7906	-3.3802	-3.767	-1.1566	0.0368	-1.79	-4.4545
55310.6	55312	55311.7	55315.4	-4.7884	-3.3804	-3.764	-1.1544	0.0366	-1.787	-4.4481
55310.6	55312.1	55311.7	55315.4	-4.785	-3.3792	-3.7638	-1.151	0.0378	-1.7868	-4.4387
55310.7	55312.1	55311.7	55315.4	-4.7832	-3.3782	-3.766	-1.1492	0.0388	-1.789	-4.4287
55310.7	55312.1	55311.7	55315.4	-4.7848	-3.3776	-3.7692	-1.1508	0.0394	-1.7922	-4.4213
55310.7	55312.1	55311.7	55315.5	-4.7874	-3.377	-3.7708	-1.1534	0.04	-1.7938	-4.4161
55310.7	55312.1	55311.7	55315.5	-4.7892	-3.3766	-3.7698	-1.1552	0.0404	-1.7928	-4.4121
55310.7	55312.1	55311.7	55315.5	-4.79	-3.3758	-3.767	-1.156	0.0412	-1.79	-4.4081
55310.7	55312.1	55311.7	55315.5	-4.7894	-3.3756	-3.7656	-1.1554	0.0414	-1.7886	-4.4023
55310.7	55312.1	55311.7	55315.5	-4.7866	-3.374	-3.7644	-1.1526	0.043	-1.7874	-4.3951
55310.7	55312.1	55311.7	55315.5	-4.7832	-3.3736	-3.7642	-1.1492	0.0434	-1.7872	-4.3865
55310.7	55312.1	55311.7	55315.5	-4.7828	-3.376	-3.7654	-1.1488	0.041	-1.7884	-4.3789
55310.7	55312.1	55311.7	55315.5	-4.7854	-3.379	-3.7686	-1.1514	0.038	-1.7916	-4.3731
55310.7	55312.1	55311.7	55315.5	-4.7878	-3.3796	-3.771	-1.1538	0.0374	-1.794	-4.3679
55310.7	55312.1	55311.7	55315.5	-4.786	-3.3774	-3.77	-1.152	0.0396	-1.793	-4.3619
55310.7	55312.1	55311.7	55315.5	-4.7836	-3.3764	-3.7674	-1.1496	0.0406	-1.7904	-4.3563
55310.7	55312.1	55311.8	55315.5	-4.7864	-3.3794	-3.7676	-1.1524	0.0376	-1.7906	-4.3533
55310.7	55312.1	55311.8	55315.5	-4.7918	-3.3828	-3.77	-1.1578	0.0342	-1.793	-4.3511
55310.7	55312.1	55311.8	55315.5	-4.7918	-3.3826	-3.7696	-1.1578	0.0344	-1.7926	-4.3461
55310.7	55312.2	55311.8	55315.5	-4.787	-3.3786	-3.7662	-1.153	0.0384	-1.7892	-4.3393
55310.8	55312.2	55311.8	55315.5	-4.7832	-3.373	-3.7642	-1.1492	0.044	-1.7872	-4.3341
55310.8	55312.2	55311.8	55315.5	-4.7842	-3.3698	-3.7668	-1.1502	0.0472	-1.7898	-4.3307
55310.8	55312.2	55311.8	55315.5	-4.7866	-3.3712	-3.7706	-1.1526	0.0458	-1.7936	-4.3259
55310.8	55312.2	55311.8	55315.6	-4.7868	-3.3742	-3.77	-1.1528	0.0428	-1.793	-4.3185
55310.8	55312.2	55311.8	55315.6	-4.7874	-3.3768	-3.7684	-1.1534	0.0402	-1.7914	-4.3111
55310.8	55312.2	55311.8	55315.6	-4.7894	-3.3796	-3.769	-1.1554	0.0374	-1.792	-4.3041
55310.8	55312.2	55311.8	55315.6	-4.7894	-3.3784	-3.77	-1.1554	0.0386	-1.793	-4.2963
55310.8	55312.2	55311.8	55315.6	-4.7852	-3.3744	-3.7694	-1.1512	0.0426	-1.7924	-4.2865
55310.8	55312.2	55311.8	55315.6	-4.7814	-3.3706	-3.7674	-1.1474	0.0464	-1.7904	-4.2777
55310.8	55312.2	55311.8	55315.6	-4.7824	-3.371	-3.7668	-1.1484	0.046	-1.7898	-4.2709
55310.8	55312.2	55311.8	55315.6	-4.7868	-3.375	-3.7678	-1.1528	0.042	-1.7908	-4.2653
55310.8	55312.2	55311.8	55315.6	-4.7894	-3.3768	-3.7678	-1.1554	0.0402	-1.7908	-4.2591
55310.8	55312.2	55311.9	55315.6	-4.7894	-3.3754	-3.7678	-1.1554	0.0416	-1.7908	-4.2529
55310.8	55312.3	55311.9	55315.6	-4.7888	-3.374	-3.7678	-1.1548	0.043	-1.7908	-4.2473
55310.8	55312.3	55311.9	55315.6	-4.7876	-3.3742	-3.7678	-1.1536	0.0428	-1.7908	-4.2409
55310.9	55312.3	55311.9	55315.6	-4.785	-3.3754	-3.7676	-1.151	0.0416	-1.7906	-4.2329
55310.9	55312.3	55311.9	55315.6	-4.7836	-3.3756	-3.7678	-1.1496	0.0414	-1.7908	-4.2269
55310.9	55312.3	55311.9	55315.6	-4.7862	-3.3762	-3.7682	-1.1522	0.0408	-1.7912	-4.2241
55310.9	55312.3	55311.9	55315.7	-4.791	-3.3782	-3.7694	-1.157	0.0388	-1.7924	-4.2225
55310.9	55312.3	55311.9	55315.7	-4.793	-3.3796	-3.7714	-1.159	0.0374	-1.7944	-4.2195
55310.9	55312.3	55311.9	55315.7	-4.7906	-3.38	-3.7722	-1.1566	0.037	-1.7952	-4.2153
55310.9	55312.3	55311.9	55315.7	-4.7866	-3.3792	-3.7718	-1.1526	0.0378	-1.7948	-4.2113
55310.9	55312.3	55311.9	55315.7	-4.7842	-3.3786	-3.7706	-1.1502	0.0384	-1.7936	-4.2085
55310.9	55312.3	55311.9	55315.7	-4.7854	-3.378	-3.7698	-1.1514	0.039	-1.7928	-4.2077
55310.9	55312.3	55311.9	55315.7	-4.7886	-3.3782	-3.7712	-1.1546	0.0388	-1.7942	-4.2081
55310.9	55312.3	55311.9	55315.7	-4.7904	-3.3782	-3.7714	-1.1564	0.0388	-1.7944	-4.2079
55310.9	55312.3	55311.9	55315.7	-4.7906	-3.3794	-3.771	-1.1566	0.0376	-1.794	-4.2059
55310.9	55312.3	55311.9	55315.7	-4.7888	-3.3802	-3.7704	-1.1548	0.0368	-1.7934	-4.2019
55310.9	55312.3	55311.9	55315.7	-4.7868	-3.3804	-3.7704	-1.1528	0.0366	-1.7934	-4.1967
55310.9	55312.3	55311.9	55315.7	-4.7868	-3.3796	-3.7724	-1.1528	0.0374	-1.7954	-4.1917
55310.9	55312.3	55311.9	55315.7	-4.787	-3.3776	-3.774	-1.153	0.0394	-1.797	-4.1867
55310.9	55312.3	55311.9	55315.7	-4.7894	-3.3764	-3.7742	-1.1554	0.0406	-1.7972	-4.1839
55310.9	55312.3	55311.9	55315.7	-4.7944	-3.378	-3.7744	-1.1604	0.039	-1.7974	-4.1827
55310.9	55312.3	55311.9	55315.7	-4.7978	-3.3792	-3.775	-1.1638	0.0378	-1.798	-4.1787
55310.9	55312.3	55311.9	55315.7	-4.7964	-3.3792	-3.7752	-1.1624	0.0378	-1.7982	-4.1703
55310.9	55312.3	55311.9	55315.7	-4.7914	-3.377	-3.775	-1.1574	0.04	-1.798	-4.1597
55310.9	55312.3	55311.9	55315.7	-4.7884	-3.3764	-3.776	-1.1544	0.0406	-1.799	-4.1497
55310.9	55312.4	55312	55315.7	-4.7904	-3.3792	-3.7786	-1.1564	0.0378	-1.8016	-4.1417
55311	55312.4	55312	55315.7	-4.7908	-3.3804	-3.7788	-1.1568	0.0366	-1.8018	-4.1331
55311	55312.4	55312	55315.7	-4.7886	-3.3788	-3.775	-1.1546	0.0382	-1.798	-4.1249
55311	55312.4	55312	55315.8	-4.789	-3.3766	-3.7712	-1.155	0.0404	-1.7942	-4.1195
55311	55312.4	55312	55315.8	-4.7926	-3.3762	-3.7712	-1.1586	0.0408	-1.7942	-4.1147
55311	55312.4	55312	55315.8	-4.7948	-3.377	-3.7724	-1.1608	0.04	-1.7954	-4.1091
55311	55312.4	55312	55315.8	-4.7912	-3.3772	-3.7724	-1.1572	0.0398	-1.7954	-4.1009
55311	55312.4	55312	55315.8	-4.7868	-3.3776	-3.7726	-1.1528	0.0394	-1.7956	-4.0931
55311	55312.4	55312	55315.8	-4.7874	-3.3804	-3.775	-1.1534	0.0366	-1.798	-4.0881
55311	55312.4	55312	55315.8	-4.7904	-3.3824	-3.7776	-1.1564	0.0346	-1.8006	-4.0855
55311	55312.4	55312	55315.8	-4.7908	-3.382	-3.7758	-1.1568	0.035	-1.7988	-4.0837
55311	55312.4	55312	55315.8	-4.7892	-3.3808	-3.772	-1.1552	0.0362	-1.795	-4.0811
55311	55312.4	55312	55315.8	-4.7892	-3.3802	-3.7708	-1.1552	0.0368	-1.7938	-4.0779
55311	55312.4	55312	55315.8	-4.7908	-3.3798	-3.7728	-1.1568	0.0372	-1.7958	-4.0755
55311	55312.4	55312	55315.8	-4.7908	-3.3778	-3.774	-1.1568	0.0392	-1.797	-4.0733
55311	55312.4	55312	55315.8	-4.7888	-3.376	-3.7732	-1.1548	0.041	-1.7962	-4.0711
55311	55312.4	55312	55315.8	-4.7886	-3.3778	-3.7736	-1.1546	0.0392	-1.7966	-4.0689
55311	55312.4	55312	55315.8	-4.79	-3.3802	-3.775	-1.156	0.0368	-1.798	-4.0675
55311	55312.4	55312	55315.8	-4.7926	-3.3808	-3.7768	-1.1586	0.0362	-1.7998	-4.0687
55311	55312.4	55312	55315.8	-4.7946	-3.3802	-3.7774	-1.1606	0.0368	-1.8004	-4.0707
55311	55312.4	55312	55315.8	-4.7952	-3.3796	-3.7774	-1.1612	0.0374	-1.8004	-4.0705
55311	55312.4	55312	55315.8	-4.7942	-3.378	-3.7776	-1.1602	0.039	-1.8006	-4.0683
55311	55312.4	55312	55315.8	-4.7916	-3.3756	-3.7766	-1.1576	0.0414	-1.7996	-4.0669
55311	55312.4	55312	55315.8	-4.7902	-3.3742	-3.7748	-1.1562	0.0428	-1.7978	-4.0683
55311	55312.4	55312	55315.8	-4.7914	-3.3774	-3.773	-1.1574	0.0396	-1.796	-4.0707
55311	55312.4	55312	55315.8	-4.7948	-3.3834	-3.7738	-1.1608	0.0336	-1.7968	-4.0727
55311	55312.4	55312	55315.8	-4.7952	-3.3848	-3.7746	-1.1612	0.0322	-1.7976	-4.0731
55311	55312.4	55312	55315.8	-4.7932	-3.3804	-3.775	-1.1592	0.0366	-1.798	-4.0743
55311	55312.4	55312	55315.8	-4.7904	-3.3748	-3.7754	-1.1564	0.0422	-1.7984	-4.0755
55311	55312.4	55312	55315.8	-4.788	-3.3732	-3.7748	-1.154	0.0438	-1.7978	-4.0755
55311	55312.4	55312	55315.8	-4.7882	-3.3764	-3.7748	-1.1542	0.0406	-1.7978	-4.0763
55311	55312.4	55312	55315.8	-4.7912	-3.3814	-3.777	-1.1572	0.0356	-1.8	-4.0791
55311	55312.4	55312	55315.8	-4.7942	-3.3848	-3.779	-1.1602	0.0322	-1.802	-4.0827
55311	55312.4	55312	55315.8	-4.7952	-3.3854	-3.7798	-1.1612	0.0316	-1.8028	-4.0865
55311	55312.4	55312	55315.8	-4.7922	-3.383	-3.7776	-1.1582	0.034	-1.8006	-4.0883
55311	55312.4	55312	55315.8	-4.7894	-3.3814	-3.7748	-1.1554	0.0356	-1.7978	-4.0901
55311	55312.4	55312	55315.8	-4.7906	-3.3818	-3.7752	-1.1566	0.0352	-1.7982	-4.0937
55311	55312.4	55312	55315.8	-4.7952	-3.3838	-3.7796	-1.1612	0.0332	-1.8026	-4.0983
55311	55312.4	55312	55315.8	-4.7986	-3.3836	-3.7828	-1.1646	0.0334	-1.8058	-4.1031
55311	55312.4	55312	55315.8	-4.797	-3.3812	-3.782	-1.163	0.0358	-1.805	-4.1055
55311	55312.4	55312	55315.8	-4.7898	-3.3774	-3.7756	-1.1558	0.0396	-1.7986	-4.1055
55311	55312.4	55312	55315.8	-4.7872	-3.3758	-3.771	-1.1532	0.0412	-1.794	-4.1075
55311	55312.4	55312	55315.8	-4.7908	-3.3764	-3.7716	-1.1568	0.0406	-1.7946	-4.1107
55311	55312.4	55312	55315.8	-4.797	-3.3776	-3.7756	-1.163	0.0394	-1.7986	-4.1135
55311	55312.4	55312	55315.8	-4.8	-3.3778	-3.7788	-1.166	0.0392	-1.8018	-4.1143
55311	55312.4	55312	55315.8	-4.7978	-3.3778	-3.7784	-1.1638	0.0392	-1.8014	-4.1125
55311	55312.4	55312	55315.8	-4.795	-3.3778	-3.7764	-1.161	0.0392	-1.7994	-4.1111
55311	55312.4	55312	55315.8	-4.794	-3.3784	-3.7762	-1.16	0.0386	-1.7992	-4.1107
55311	55312.4	55312	55315.8	-4.7938	-3.3786	-3.7776	-1.1598	0.0384	-1.8006	-4.1105
55311	55312.4	55312	55315.8	-4.7938	-3.3786	-3.778	-1.1598	0.0384	-1.801	-4.1095
55311	55312.4	55312	55315.8	-4.793	-3.3798	-3.7762	-1.159	0.0372	-1.7992	-4.1061
55311	55312.4	55312	55315.8	-4.792	-3.3812	-3.7738	-1.158	0.0358	-1.7968	-4.1021
55311	55312.4	55312	55315.8	-4.7904	-3.3814	-3.7734	-1.1564	0.0356	-1.7964	-4.0993
55311	55312.4	55312	55315.8	-4.7892	-3.38	-3.7754	-1.1552	0.037	-1.7984	-4.0973
55311	55312.4	55312	55315.8	-4.7886	-3.3782	-3.777	-1.1546	0.0388	-1.8	-4.0955
55311	55312.4	55312	55315.8	-4.7878	-3.3776	-3.7776	-1.1538	0.0394	-1.8006	-4.0935
55311	55312.4	55312	55315.8	-4.7888	-3.3782	-3.7776	-1.1548	0.0388	-1.8006	-4.0929
55311	55312.4	55312	55315.8	-4.7906	-3.3782	-3.7768	-1.1566	0.0388	-1.7998	-4.0929
55311	55312.4	55312	55315.8	-4.7934	-3.3784	-3.776	-1.1594	0.0386	-1.799	-4.0925
55311	55312.4	55312	55315.8	-4.7946	-3.3788	-3.777	-1.1606	0.0382	-1.8	-4.0895
55311	55312.4	55312	55315.8	-4.7928	-3.379	-3.7786	-1.1588	0.038	-1.8016	-4.0841
55311	55312.4	55312	55315.8	-4.7878	-3.3776	-3.7788	-1.1538	0.0394	-1.8018	-4.0765
55311	55312.4	55312	55315.8	-4.7862	-3.3768	-3.7788	-1.1522	0.0402	-1.8018	-4.0707
55311	55312.4	55312	55315.8	-4.7868	-3.3752	-3.7772	-1.1528	0.0418	-1.8002	-4.0673
55311	55312.4	55312	55315.8	-4.7888	-3.374	-3.7756	-1.1548	0.043	-1.7986	-4.0649
55311	55312.4	55312	55315.8	-4.7906	-3.374	-3.7758	-1.1566	0.043	-1.7988	-4.0617
55311	55312.4	55312	55315.8	-4.7912	-3.375	-3.776	-1.1572	0.042	-1.799	-4.0581
55311	55312.4	55312	55315.8	-4.7906	-3.3764	-3.7772	-1.1566	0.0406	-1.8002	-4.0541
55311	55312.4	55312	55315.8	-4.7912	-3.3776	-3.7788	-1.1572	0.0394	-1.8018	-4.0505
55311	55312.5	55312.1	55315.8	-4.7916	-3.377	-3.7798	-1.1576	0.04	-1.8028	-4.0465
55311	55312.5	55312.1	55315.8	-4.7912	-3.3768	-3.7788	-1.1572	0.0402	-1.8018	-4.0423
55311	55312.5	55312.1	55315.8	-4.7906	-3.3786	-3.7782	-1.1566	0.0384	-1.8012	-4.0381
55311.1	55312.5	55312.1	55315.8	-4.7904	-3.3788	-3.7774	-1.1564	0.0382	-1.8004	-4.0351
55311.1	55312.5	55312.1	55315.8	-4.794	-3.3794	-3.7774	-1.16	0.0376	-1.8004	-4.0345
55311.1	55312.5	55312.1	55315.8	-4.7958	-3.3778	-3.777	-1.1618	0.0392	-1.8	-4.0335
55311.1	55312.5	55312.1	55315.9	-4.7936	-3.3762	-3.7764	-1.1596	0.0408	-1.7994	-4.0289
55311.1	55312.5	55312.1	55315.9	-4.7898	-3.377	-3.7764	-1.1558	0.04	-1.7994	-4.0201
55311.1	55312.5	55312.1	55315.9	-4.788	-3.3804	-3.7788	-1.154	0.0366	-1.8018	-4.0105
55311.1	55312.5	55312.1	55315.9	-4.7878	-3.3828	-3.7788	-1.1538	0.0342	-1.8018	-4.0033
55311.1	55312.5	55312.1	55315.9	-4.7884	-3.3824	-3.7782	-1.1544	0.0346	-1.8012	-3.9987
55311.1	55312.5	55312.1	55315.9	-4.7892	-3.3786	-3.7776	-1.1552	0.0384	-1.8006	-3.9947
55311.1	55312.5	55312.1	55315.9	-4.7912	-3.3758	-3.7772	-1.1572	0.0412	-1.8002	-3.9895
55311.1	55312.5	55312.1	55315.9	-4.792	-3.3758	-3.777	-1.158	0.0412	-1.8	-3.9821
55311.1	55312.5	55312.1	55315.9	-4.7914	-3.3786	-3.777	-1.1574	0.0384	-1.8	-3.9727
55311.1	55312.5	55312.1	55315.9	-4.7912	-3.3808	-3.7782	-1.1572	0.0362	-1.8012	-3.9631
55311.1	55312.5	55312.1	55315.9	-4.791	-3.3804	-3.7796	-1.157	0.0366	-1.8026	-3.9543
55311.1	55312.6	55312.2	55315.9	-4.7912	-3.3794	-3.7788	-1.1572	0.0376	-1.8018	-3.9465
55311.1	55312.6	55312.2	55315.9	-4.7926	-3.3788	-3.778	-1.1586	0.0382	-1.801	-3.9391
55311.2	55312.6	55312.2	55315.9	-4.7938	-3.3788	-3.7792	-1.1598	0.0382	-1.8022	-3.9305
55311.2	55312.6	55312.2	55316	-4.7952	-3.379	-3.7824	-1.1612	0.038	-1.8054	-3.9213
55311.2	55312.6	55312.2	55316	-4.7956	-3.3792	-3.7848	-1.1616	0.0378	-1.8078	-3.9123
55311.2	55312.6	55312.2	55316	-4.7928	-3.3798	-3.783	-1.1588	0.0372	-1.806	-3.9025
55311.2	55312.6	55312.2	55316	-4.7894	-3.3806	-3.7796	-1.1554	0.0364	-1.8026	-3.8917
55311.2	55312.6	55312.2	55316	-4.7888	-3.3812	-3.777	-1.1548	0.0358	-1.8	-3.8817
55311.2	55312.6	55312.2	55316	-4.7918	-3.3816	-3.7758	-1.1578	0.0354	-1.7988	-3.8745
55311.2	55312.6	55312.2	55316	-4.7954	-3.3802	-3.7758	-1.1614	0.0368	-1.7988	-3.8695
55311.2	55312.6	55312.2	55316	-4.7962	-3.3788	-3.7776	-1.1622	0.0382	-1.8006	-3.8623
55311.2	55312.7	55312.2	55316	-4.7952	-3.3786	-3.7814	-1.1612	0.0384	-1.8044	-3.8515
55311.2	55312.7	55312.3	55316	-4.7936	-3.3782	-3.783	-1.1596	0.0388	-1.806	-3.8393
55311.3	55312.7	55312.3	55316	-4.792	-3.3776	-3.7812	-1.158	0.0394	-1.8042	-3.8279
55311.3	55312.7	55312.3	55316.1	-4.7916	-3.3784	-3.7794	-1.1576	0.0386	-1.8024	-3.8185
55311.3	55312.7	55312.3	55316.1	-4.7926	-3.38	-3.779	-1.1586	0.037	-1.802	-3.8101
55311.3	55312.7	55312.3	55316.1	-4.7938	-3.3804	-3.7786	-1.1598	0.0366	-1.8016	-3.8007
55311.3	55312.7	55312.3	55316.1	-4.7948	-3.3782	-3.7762	-1.1608	0.0388	-1.7992	-3.7915
55311.3	55312.7	55312.3	55316.1	-4.7948	-3.3768	-3.7738	-1.1608	0.0402	-1.7968	-3.7813
55311.3	55312.7	55312.3	55316.1	-4.794	-3.3794	-3.776	-1.16	0.0376	-1.799	-3.7693
55311.3	55312.7	55312.3	55316.1	-4.7936	-3.3824	-3.7808	-1.1596	0.0346	-1.8038	-3.7575
55311.3	55312.8	55312.3	55316.1	-4.7946	-3.383	-3.7846	-1.1606	0.034	-1.8076	-3.7465
55311.3	55312.8	55312.4	55316.1	-4.797	-3.3832	-3.785	-1.163	0.0338	-1.808	-3.7367
55311.4	55312.8	55312.4	55316.2	-4.798	-3.3838	-3.7826	-1.164	0.0332	-1.8056	-3.7259
55311.4	55312.8	55312.4	55316.2	-4.7962	-3.3844	-3.7802	-1.1622	0.0326	-1.8032	-3.7133
55311.4	55312.8	55312.4	55316.2	-4.7966	-3.3844	-3.7798	-1.1626	0.0326	-1.8028	-3.7023
55311.4	55312.8	55312.4	55316.2	-4.798	-3.3822	-3.778	-1.164	0.0348	-1.801	-3.6939
55311.4	55312.8	55312.4	55316.2	-4.7978	-3.3804	-3.7766	-1.1638	0.0366	-1.7996	-3.6845
55311.4	55312.8	55312.4	55316.2	-4.7946	-3.3792	-3.7762	-1.1606	0.0378	-1.7992	-3.6717
55311.4	55312.8	55312.4	55316.2	-4.7906	-3.3778	-3.7774	-1.1566	0.0392	-1.8004	-3.6563
55311.4	55312.9	55312.5	55316.2	-4.7904	-3.3792	-3.7808	-1.1564	0.0378	-1.8038	-3.6413
55311.5	55312.9	55312.5	55316.3	-4.796	-3.3824	-3.7834	-1.162	0.0346	-1.8064	-3.6311
55311.5	55312.9	55312.5	55316.3	-4.8006	-3.3856	-3.784	-1.1666	0.0314	-1.807	-3.6219
55311.5	55312.9	55312.5	55316.3	-4.8002	-3.3862	-3.783	-1.1662	0.0308	-1.806	-3.6107
55311.5	55312.9	55312.5	55316.3	-4.7956	-3.3836	-3.7802	-1.1616	0.0334	-1.8032	-3.5975
55311.5	55312.9	55312.5	55316.3	-4.7928	-3.382	-3.7788	-1.1588	0.035	-1.8018	-3.5843
55311.5	55312.9	55312.5	55316.3	-4.7952	-3.3832	-3.7806	-1.1612	0.0338	-1.8036	-3.5731
55311.5	55312.9	55312.5	55316.3	-4.799	-3.3834	-3.7814	-1.165	0.0336	-1.8044	-3.5633
55311.5	55313	55312.6	55316.3	-4.7984	-3.3818	-3.7792	-1.1644	0.0352	-1.8022	-3.5519
55311.5	55313	55312.6	55316.3	-4.7952	-3.38	-3.7756	-1.1612	0.037	-1.7986	-3.5389
55311.6	55313	55312.6	55316.4	-4.794	-3.3806	-3.775	-1.16	0.0364	-1.798	-3.5253
55311.6	55313	55312.6	55316.4	-4.7946	-3.3826	-3.7786	-1.1606	0.0344	-1.8016	-3.5103
55311.6	55313	55312.6	55316.4	-4.7956	-3.3834	-3.783	-1.1616	0.0336	-1.806	-3.4957
55311.6	55313	55312.6	55316.4	-4.7952	-3.383	-3.7848	-1.1612	0.034	-1.8078	-3.4817
55311.6	55313	55312.6	55316.4	-4.7932	-3.383	-3.7824	-1.1592	0.034	-1.8054	-3.4691
55311.6	55313	55312.6	55316.4	-4.794	-3.3836	-3.7796	-1.16	0.0334	-1.8026	-3.4587
55311.6	55313	55312.7	55316.4	-4.7974	-3.3852	-3.7788	-1.1634	0.0318	-1.8018	-3.4491
55311.6	55313.1	55312.7	55316.4	-4.8002	-3.386	-3.7794	-1.1662	0.031	-1.8024	-3.4385
55311.7	55313.1	55312.7	55316.5	-4.8008	-3.3854	-3.7792	-1.1668	0.0316	-1.8022	-3.4279
55311.7	55313.1	55312.7	55316.5	-4.7988	-3.385	-3.7788	-1.1648	0.032	-1.8018	-3.4153
55311.7	55313.1	55312.7	55316.5	-4.7972	-3.3848	-3.778	-1.1632	0.0322	-1.801	-3.4015
55311.7	55313.1	55312.7	55316.5	-4.7976	-3.386	-3.7796	-1.1636	0.031	-1.8026	-3.3873
55311.7	55313.1	55312.7	55316.5	-4.7976	-3.3866	-3.7812	-1.1636	0.0304	-1.8042	-3.3741
55311.7	55313.1	55312.7	55316.5	-4.7964	-3.3848	-3.7824	-1.1624	0.0322	-1.8054	-3.3623
55311.7	55313.1	55312.7	55316.5	-4.7968	-3.383	-3.783	-1.1628	0.034	-1.806	-3.3521
55311.7	55313.2	55312.8	55316.5	-4.7988	-3.3816	-3.7824	-1.1648	0.0354	-1.8054	-3.3425
55311.8	55313.2	55312.8	55316.6	-4.7982	-3.3786	-3.7786	-1.1642	0.0384	-1.8016	-3.3323
55311.8	55313.2	55312.8	55316.6	-4.7962	-3.3768	-3.7754	-1.1622	0.0402	-1.7984	-3.3213
55311.8	55313.2	55312.8	55316.6	-4.7968	-3.3786	-3.7756	-1.1628	0.0384	-1.7986	-3.3109
55311.8	55313.2	55312.8	55316.6	-4.799	-3.381	-3.7786	-1.165	0.036	-1.8016	-3.3009
55311.8	55313.2	55312.8	55316.6	-4.7994	-3.3818	-3.7808	-1.1654	0.0352	-1.8038	-3.2901
55311.8	55313.2	55312.8	55316.6	-4.7974	-3.3814	-3.7808	-1.1634	0.0356	-1.8038	-3.2789
55311.8	55313.2	55312.8	55316.6	-4.796	-3.382	-3.7792	-1.162	0.035	-1.8022	-3.2685
55311.8	55313.2	55312.8	55316.6	-4.7986	-3.386	-3.7796	-1.1646	0.031	-1.8026	-3.2595
55311.8	55313.2	55312.9	55316.6	-4.8002	-3.388	-3.7804	-1.1662	0.029	-1.8034	-3.2501
55311.8	55313.3	55312.9	55316.6	-4.7986	-3.3848	-3.7798	-1.1646	0.0322	-1.8028	-3.2413
55311.9	55313.3	55312.9	55316.6	-4.7966	-3.38	-3.778	-1.1626	0.037	-1.801	-3.2339
55311.9	55313.3	55312.9	55316.7	-4.7956	-3.3766	-3.7758	-1.1616	0.0404	-1.7988	-3.2269
55311.9	55313.3	55312.9	55316.7	-4.7954	-3.376	-3.775	-1.1614	0.041	-1.798	-3.2193
55311.9	55313.3	55312.9	55316.7	-4.7958	-3.3794	-3.7766	-1.1618	0.0376	-1.7996	-3.2113
55311.9	55313.3	55312.9	55316.7	-4.7946	-3.3834	-3.7782	-1.1606	0.0336	-1.8012	-3.2029
55311.9	55313.3	55312.9	55316.7	-4.7938	-3.3858	-3.7788	-1.1598	0.0312	-1.8018	-3.1951
55311.9	55313.3	55312.9	55316.7	-4.7956	-3.386	-3.7796	-1.1616	0.031	-1.8026	-3.1891
55311.9	55313.3	55312.9	55316.7	-4.7986	-3.3842	-3.782	-1.1646	0.0328	-1.805	-3.1841
55311.9	55313.3	55312.9	55316.7	-4.8008	-3.3826	-3.7832	-1.1668	0.0344	-1.8062	-3.1801
55311.9	55313.3	55312.9	55316.7	-4.7996	-3.3834	-3.7822	-1.1656	0.0336	-1.8052	-3.1737
55311.9	55313.3	55312.9	55316.7	-4.7952	-3.3836	-3.7792	-1.1612	0.0334	-1.8022	-3.1655
55311.9	55313.3	55312.9	55316.7	-4.7924	-3.3806	-3.776	-1.1584	0.0364	-1.799	-3.1595
55311.9	55313.3	55312.9	55316.7	-4.792	-3.3772	-3.7746	-1.158	0.0398	-1.7976	-3.1563
55311.9	55313.3	55312.9	55316.7	-4.7946	-3.3778	-3.7754	-1.1606	0.0392	-1.7984	-3.1547
55311.9	55313.4	55313	55316.7	-4.7974	-3.3812	-3.778	-1.1634	0.0358	-1.801	-3.1511
55311.9	55313.4	55313	55316.7	-4.7998	-3.3848	-3.782	-1.1658	0.0322	-1.805	-3.1453
55311.9	55313.4	55313	55316.7	-4.801	-3.3852	-3.784	-1.167	0.0318	-1.807	-3.1401
55311.9	55313.4	55313	55316.7	-4.7994	-3.384	-3.7816	-1.1654	0.033	-1.8046	-3.1361
55312	55313.4	55313	55316.7	-4.796	-3.383	-3.7768	-1.162	0.034	-1.7998	-3.1323
55312	55313.4	55313	55316.8	-4.7942	-3.3826	-3.7738	-1.1602	0.0344	-1.7968	-3.1289
55312	55313.4	55313	55316.8	-4.7942	-3.3822	-3.775	-1.1602	0.0348	-1.798	-3.1253
55312	55313.4	55313	55316.8	-4.7956	-3.3818	-3.7784	-1.1616	0.0352	-1.8014	-3.1217
55312	55313.4	55313	55316.8	-4.796	-3.381	-3.781	-1.162	0.036	-1.804	-3.1171
55312	55313.4	55313	55316.8	-4.794	-3.3806	-3.782	-1.16	0.0364	-1.805	-3.1107
55312	55313.4	55313	55316.8	-4.7938	-3.3812	-3.7822	-1.1598	0.0358	-1.8052	-3.1063
55312	55313.4	55313	55316.8	-4.7966	-3.3822	-3.7816	-1.1626	0.0348	-1.8046	-3.1063
55312	55313.4	55313	55316.8	-4.7982	-3.381	-3.781	-1.1642	0.036	-1.804	-3.1067
55312	55313.4	55313	55316.8	-4.7992	-3.3798	-3.7808	-1.1652	0.0372	-1.8038	-3.1067
55312	55313.4	55313	55316.8	-4.7978	-3.38	-3.7802	-1.1638	0.037	-1.8032	-3.1041
55312	55313.4	55313	55316.8	-4.7954	-3.3808	-3.7782	-1.1614	0.0362	-1.8012	-3.1001
55312	55313.4	55313	55316.8	-4.7956	-3.383	-3.7772	-1.1616	0.034	-1.8002	-3.0971
55312	55313.4	55313	55316.8	-4.7968	-3.3838	-3.7788	-1.1628	0.0332	-1.8018	-3.0949
55312	55313.4	55313	55316.8	-4.796	-3.3818	-3.7804	-1.162	0.0352	-1.8034	-3.0917
55312	55313.4	55313	55316.8	-4.7962	-3.3806	-3.7816	-1.1622	0.0364	-1.8046	-3.0905
55312	55313.4	55313	55316.8	-4.7968	-3.381	-3.7818	-1.1628	0.036	-1.8048	-3.0901
55312	55313.4	55313	55316.8	-4.7988	-3.3826	-3.782	-1.1648	0.0344	-1.805	-3.0905
55312	55313.4	55313	55316.8	-4.7992	-3.3824	-3.7814	-1.1652	0.0346	-1.8044	-3.0891
55312	55313.4	55313	55316.8	-4.7962	-3.3798	-3.7812	-1.1622	0.0372	-1.8042	-3.0837
55312	55313.4	55313	55316.8	-4.7924	-3.3782	-3.782	-1.1584	0.0388	-1.805	-3.0767
55312	55313.4	55313	55316.8	-4.7936	-3.3798	-3.7842	-1.1596	0.0372	-1.8072	-3.0735
55312	55313.4	55313	55316.8	-4.7988	-3.382	-3.7856	-1.1648	0.035	-1.8086	-3.0739
55312	55313.4	55313	55316.8	-4.8022	-3.3808	-3.7858	-1.1682	0.0362	-1.8088	-3.0741
55312	55313.4	55313	55316.8	-4.8008	-3.378	-3.7848	-1.1668	0.039	-1.8078	-3.0705
55312	55313.4	55313	55316.8	-4.796	-3.3772	-3.784	-1.162	0.0398	-1.807	-3.0631
55312	55313.4	55313	55316.8	-4.7938	-3.3786	-3.7836	-1.1598	0.0384	-1.8066	-3.0569
55312	55313.4	55313	55316.8	-4.797	-3.3816	-3.7858	-1.163	0.0354	-1.8088	-3.0547
55312	55313.4	55313	55316.8	-4.8008	-3.3822	-3.7874	-1.1668	0.0348	-1.8104	-3.0549
55312	55313.5	55313	55316.8	-4.8006	-3.3812	-3.7864	-1.1666	0.0358	-1.8094	-3.0541
55312	55313.5	55313	55316.8	-4.7972	-3.3794	-3.7842	-1.1632	0.0376	-1.8072	-3.0507
55312	55313.5	55313	55316.8	-4.7946	-3.3792	-3.7846	-1.1606	0.0378	-1.8076	-3.0459
55312	55313.5	55313.1	55316.8	-4.796	-3.3802	-3.7874	-1.162	0.0368	-1.8104	-3.0433
55312	55313.5	55313.1	55316.8	-4.7982	-3.3808	-3.789	-1.1642	0.0362	-1.812	-3.0431
55312	55313.5	55313.1	55316.8	-4.7988	-3.381	-3.7878	-1.1648	0.036	-1.8108	-3.0435
55312	55313.5	55313.1	55316.8	-4.7972	-3.3806	-3.7856	-1.1632	0.0364	-1.8086	-3.0431
55312	55313.5	55313.1	55316.8	-4.7958	-3.3804	-3.7834	-1.1618	0.0366	-1.8064	-3.0421
55312	55313.5	55313.1	55316.8	-4.795	-3.381	-3.7832	-1.161	0.036	-1.8062	-3.0403
55312	55313.5	55313.1	55316.8	-4.7958	-3.379	-3.7832	-1.1618	0.038	-1.8062	-3.0401
55312	55313.5	55313.1	55316.8	-4.7982	-3.378	-3.7838	-1.1642	0.039	-1.8068	-3.0407
55312	55313.5	55313.1	55316.8	-4.802	-3.3792	-3.7856	-1.168	0.0378	-1.8086	-3.0421
55312	55313.5	55313.1	55316.8	-4.8036	-3.3814	-3.7862	-1.1696	0.0356	-1.8092	-3.0427
55312	55313.5	55313.1	55316.8	-4.8018	-3.3828	-3.7864	-1.1678	0.0342	-1.8094	-3.0411
55312	55313.5	55313.1	55316.8	-4.7976	-3.3814	-3.7862	-1.1636	0.0356	-1.8092	-3.0381
55312	55313.5	55313.1	55316.8	-4.7956	-3.3804	-3.785	-1.1616	0.0366	-1.808	-3.0371
55312	55313.5	55313.1	55316.8	-4.7982	-3.3816	-3.785	-1.1642	0.0354	-1.808	-3.0403
55312	55313.5	55313.1	55316.8	-4.8008	-3.3824	-3.7852	-1.1668	0.0346	-1.8082	-3.0449
55312	55313.5	55313.1	55316.8	-4.8004	-3.3826	-3.7854	-1.1664	0.0344	-1.8084	-3.0473
55312	55313.5	55313	55316.8	-4.8	-3.3834	-3.7876	-1.166	0.0336	-1.8106	-3.0493
55312	55313.4	55313	55316.8	-4.8004	-3.3852	-3.7902	-1.1664	0.0318	-1.8132	-3.0521
55312	55313.4	55313	55316.8	-4.8006	-3.3852	-3.791	-1.1666	0.0318	-1.814	-3.0563
55312	55313.4	55313	55316.8	-4.8014	-3.3838	-3.7894	-1.1674	0.0332	-1.8124	-3.0619
55312	55313.4	55313	55316.8	-4.8022	-3.3828	-3.7868	-1.1682	0.0342	-1.8098	-3.0669
55312	55313.4	55313	55316.8	-4.8038	-3.383	-3.7854	-1.1698	0.034	-1.8084	-3.0725
55312	55313.4	55313	55316.8	-4.8026	-3.384	-3.785	-1.1686	0.033	-1.808	-3.0765
55312	55313.4	55313	55316.8	-4.7968	-3.3824	-3.7836	-1.1628	0.0346	-1.8066	-3.0775
55312	55313.4	55313	55316.8	-4.7942	-3.3796	-3.7826	-1.1602	0.0374	-1.8056	-3.0805
55312	55313.4	55313	55316.8	-4.798	-3.3786	-3.7826	-1.164	0.0384	-1.8056	-3.0873
55312	55313.4	55313	55316.8	-4.803	-3.3798	-3.7838	-1.169	0.0372	-1.8068	-3.0939
55312	55313.4	55313	55316.8	-4.8038	-3.3802	-3.7838	-1.1698	0.0368	-1.8068	-3.0985
55312	55313.4	55313	55316.8	-4.8028	-3.3812	-3.7848	-1.1688	0.0358	-1.8078	-3.1019
55312	55313.4	55313	55316.8	-4.8006	-3.3818	-3.786	-1.1666	0.0352	-1.809	-3.1041
55312	55313.4	55313	55316.8	-4.7998	-3.3836	-3.7872	-1.1658	0.0334	-1.8102	-3.1061
55312	55313.4	55313	55316.8	-4.7982	-3.3836	-3.7864	-1.1642	0.0334	-1.8094	-3.1073
55312	55313.4	55313	55316.8	-4.7958	-3.3806	-3.7842	-1.1618	0.0364	-1.8072	-3.1079
55312	55313.4	55313	55316.8	-4.7966	-3.3792	-3.7832	-1.1626	0.0378	-1.8062	-3.1095
55312	55313.4	55313	55316.8	-4.7992	-3.3812	-3.785	-1.1652	0.0358	-1.808	-3.1101
55312	55313.4	55313	55316.8	-4.8006	-3.3848	-3.7862	-1.1666	0.0322	-1.8092	-3.1089
55312	55313.4	55313	55316.8	-4.8024	-3.3882	-3.7858	-1.1684	0.0288	-1.8088	-3.1085
55312	55313.4	55313	55316.8	-4.8022	-3.3872	-3.7834	-1.1682	0.0298	-1.8064	-3.1083
55312	55313.4	55313	55316.8	-4.802	-3.3842	-3.7836	-1.168	0.0328	-1.8066	-3.1083
55312	55313.4	55313	55316.8	-4.8026	-3.3814	-3.7856	-1.1686	0.0356	-1.8086	-3.1083
55312	55313.4	55313	55316.8	-4.8018	-3.3806	-3.7856	-1.1678	0.0364	-1.8086	-3.1063
55312	55313.4	55313	55316.8	-4.8006	-3.3806	-3.7826	-1.1666	0.0364	-1.8056	-3.1037
55312	55313.4	55313	55316.8	-4.7992	-3.3802	-3.7808	-1.1652	0.0368	-1.8038	-3.1007
55312	55313.4	55313	55316.8	-4.799	-3.379	-3.782	-1.165	0.038	-1.805	-3.0987
55312	55313.4	55313	55316.8	-4.7994	-3.3796	-3.7846	-1.1654	0.0374	-1.8076	-3.0967
55312	55313.4	55313	55316.8	-4.7986	-3.3814	-3.7854	-1.1646	0.0356	-1.8084	-3.0937
55312	55313.4	55313	55316.8	-4.798	-3.3814	-3.7842	-1.164	0.0356	-1.8072	-3.0919
55312	55313.4	55313	55316.8	-4.7998	-3.3816	-3.7836	-1.1658	0.0354	-1.8066	-3.0929
55312	55313.4	55313	55316.8	-4.8008	-3.3822	-3.7826	-1.1668	0.0348	-1.8056	-3.0939
55312	55313.4	55313	55316.8	-4.7992	-3.3824	-3.7812	-1.1652	0.0346	-1.8042	-3.0921
55312	55313.4	55313	55316.8	-4.7952	-3.3818	-3.7804	-1.1612	0.0352	-1.8034	-3.0871
55312	55313.4	55313	55316.8	-4.794	-3.3802	-3.7808	-1.16	0.0368	-1.8038	-3.0837
55312	55313.4	55313	55316.8	-4.7958	-3.3782	-3.7802	-1.1618	0.0388	-1.8032	-3.0837
55312	55313.4	55313	55316.8	-4.7988	-3.3784	-3.7802	-1.1648	0.0386	-1.8032	-3.0851
55312	55313.4	55313	55316.8	-4.7994	-3.3796	-3.7794	-1.1654	0.0374	-1.8024	-3.0849
55312	55313.4	55313	55316.8	-4.7984	-3.3814	-3.78	-1.1644	0.0356	-1.803	-3.0823
55312	55313.4	55313	55316.8	-4.7988	-3.3838	-3.7814	-1.1648	0.0332	-1.8044	-3.0791
55312	55313.4	55313	55316.8	-4.8008	-3.3842	-3.7826	-1.1668	0.0328	-1.8056	-3.0761
55312	55313.4	55313	55316.8	-4.8012	-3.3828	-3.7828	-1.1672	0.0342	-1.8058	-3.0715
55312	55313.4	55313	55316.8	-4.8002	-3.3824	-3.7826	-1.1662	0.0346	-1.8056	-3.0649
55312	55313.4	55313	55316.8	-4.797	-3.3816	-3.781	-1.163	0.0354	-1.804	-3.0563
55312	55313.5	55313.1	55316.8	-4.7946	-3.3808	-3.7794	-1.1606	0.0362	-1.8024	-3.0481
55312	55313.5	55313.1	55316.8	-4.793	-3.38	-3.779	-1.159	0.037	-1.802	-3.0393
55312.1	55313.5	55313.1	55316.8	-4.7934	-3.379	-3.78	-1.1594	0.038	-1.803	-3.0299
55312.1	55313.5	55313.1	55316.9	-4.7954	-3.3798	-3.781	-1.1614	0.0372	-1.804	-3.0193
55312.1	55313.5	55313.1	55316.9	-4.7976	-3.3824	-3.7812	-1.1636	0.0346	-1.8042	-3.0075
55312.1	55313.5	55313.1	55316.9	-4.797	-3.383	-3.7792	-1.163	0.034	-1.8022	-2.9941
55312.1	55313.5	55313.1	55316.9	-4.7966	-3.3826	-3.7788	-1.1626	0.0344	-1.8018	-2.9799
55312.1	55313.5	55313.1	55316.9	-4.7962	-3.3804	-3.7788	-1.1622	0.0366	-1.8018	-2.9653
55312.1	55313.6	55313.2	55316.9	-4.7968	-3.3796	-3.779	-1.1628	0.0374	-1.802	-2.9511
55312.1	55313.6	55313.2	55316.9	-4.7984	-3.381	-3.7802	-1.1644	0.036	-1.8032	-2.9369
55312.2	55313.6	55313.2	55317	-4.8008	-3.3832	-3.7818	-1.1668	0.0338	-1.8048	-2.9225
55312.2	55313.6	55313.2	55317	-4.8024	-3.384	-3.783	-1.1684	0.033	-1.806	-2.9067
55312.2	55313.6	55313.2	55317	-4.801	-3.3846	-3.7836	-1.167	0.0324	-1.8066	-2.8887
55312.2	55313.6	55313.2	55317	-4.7968	-3.3842	-3.7822	-1.1628	0.0328	-1.8052	-2.8701
55312.2	55313.6	55313.2	55317	-4.793	-3.3826	-3.7794	-1.159	0.0344	-1.8024	-2.8531
55312.2	55313.7	55313.3	55317	-4.7918	-3.3792	-3.7754	-1.1578	0.0378	-1.7984	-2.8389
55312.3	55313.7	55313.3	55317.1	-4.7928	-3.376	-3.7732	-1.1588	0.041	-1.7962	-2.8249
55312.3	55313.7	55313.3	55317.1	-4.7962	-3.376	-3.7752	-1.1622	0.041	-1.7982	-2.8097
55312.3	55313.7	55313.3	55317.1	-4.7996	-3.3798	-3.7792	-1.1656	0.0372	-1.8022	-2.7927
55312.3	55313.7	55313.3	55317.1	-4.8018	-3.3842	-3.7828	-1.1678	0.0328	-1.8058	-2.7753
55312.3	55313.7	55313.3	55317.1	-4.8032	-3.3866	-3.785	-1.1692	0.0304	-1.808	-2.7595
55312.3	55313.8	55313.4	55317.1	-4.8024	-3.3852	-3.7828	-1.1684	0.0318	-1.8058	-2.7435
55312.4	55313.8	55313.4	55317.2	-4.8	-3.3796	-3.7778	-1.166	0.0374	-1.8008	-2.7269
55312.4	55313.8	55313.4	55317.2	-4.797	-3.3742	-3.7724	-1.163	0.0428	-1.7954	-2.7097
55312.4	55313.8	55313.4	55317.2	-4.796	-3.372	-3.771	-1.162	0.045	-1.794	-2.6941
55312.4	55313.8	55313.4	55317.2	-4.7974	-3.3752	-3.775	-1.1634	0.0418	-1.798	-2.6795
55312.4	55313.8	55313.4	55317.2	-4.7992	-3.3796	-3.7802	-1.1652	0.0374	-1.8032	-2.6645
55312.4	55313.9	55313.5	55317.2	-4.7982	-3.3806	-3.7814	-1.1642	0.0364	-1.8044	-2.6485
55312.5	55313.9	55313.5	55317.2	-4.7956	-3.3798	-3.7794	-1.1616	0.0372	-1.8024	-2.6331
55312.5	55313.9	55313.5	55317.3	-4.7926	-3.3794	-3.7764	-1.1586	0.0376	-1.7994	-2.6197
55312.5	55313.9	55313.5	55317.3	-4.7912	-3.3792	-3.7756	-1.1572	0.0378	-1.7986	-2.6093
55312.5	55313.9	55313.5	55317.3	-4.7926	-3.3788	-3.7768	-1.1586	0.0382	-1.7998	-2.6009
55312.5	55313.9	55313.5	55317.3	-4.795	-3.3778	-3.778	-1.161	0.0392	-1.801	-2.5937
55312.5	55313.9	55313.5	55317.3	-4.7972	-3.3772	-3.7772	-1.1632	0.0398	-1.8002	-2.5875
55312.5	55313.9	55313.5	55317.3	-4.7988	-3.3772	-3.7746	-1.1648	0.0398	-1.7976	-2.5825
55312.5	55313.9	55313.5	55317.3	-4.7994	-3.3788	-3.774	-1.1654	0.0382	-1.797	-2.5775
55312.5	55313.9	55313.5	55317.3	-4.7998	-3.3808	-3.777	-1.1658	0.0362	-1.8	-2.5715
55312.5	55313.9	55313.5	55317.3	-4.8002	-3.3814	-3.781	-1.1662	0.0356	-1.804	-2.5663
55312.5	55313.9	55313.5	55317.3	-4.7996	-3.3798	-3.7816	-1.1656	0.0372	-1.8046	-2.5629
55312.5	55313.9	55313.5	55317.3	-4.7982	-3.3784	-3.7778	-1.1642	0.0386	-1.8008	-2.5595
55312.5	55313.9	55313.6	55317.3	-4.7956	-3.3776	-3.774	-1.1616	0.0394	-1.797	-2.5549
55312.5	55314	55313.6	55317.3	-4.7928	-3.3754	-3.7724	-1.1588	0.0416	-1.7954	-2.5511
55312.5	55314	55313.6	55317.3	-4.7902	-3.3718	-3.7704	-1.1562	0.0452	-1.7934	-2.5493
55312.5	55314	55313.6	55317.3	-4.7916	-3.3724	-3.771	-1.1576	0.0446	-1.794	-2.5491
55312.5	55314	55313.6	55317.3	-4.7942	-3.376	-3.7736	-1.1602	0.041	-1.7966	-2.5483
55312.5	55314	55313.6	55317.3	-4.7946	-3.3788	-3.7764	-1.1606	0.0382	-1.7994	-2.5473
55312.5	55314	55313.6	55317.3	-4.7936	-3.3782	-3.7772	-1.1596	0.0388	-1.8002	-2.5479
55312.5	55314	55313.6	55317.3	-4.795	-3.377	-3.7762	-1.161	0.04	-1.7992	-2.5505
55312.5	55314	55313.6	55317.3	-4.7972	-3.3772	-3.7754	-1.1632	0.0398	-1.7984	-2.5527
55312.5	55314	55313.6	55317.3	-4.7998	-3.379	-3.7766	-1.1658	0.038	-1.7996	-2.5551
55312.5	55313.9	55313.5	55317.3	-4.7992	-3.3786	-3.7774	-1.1652	0.0384	-1.8004	-2.5583
55312.5	55313.9	55313.5	55317.3	-4.797	-3.3764	-3.7762	-1.163	0.0406	-1.7992	-2.5623
55312.5	55313.9	55313.5	55317.3	-4.796	-3.3752	-3.7742	-1.162	0.0418	-1.7972	-2.5673
55312.5	55313.9	55313.5	55317.3	-4.796	-3.3752	-3.7724	-1.162	0.0418	-1.7954	-2.5735
55312.5	55313.9	55313.5	55317.3	-4.7956	-3.3746	-3.7722	-1.1616	0.0424	-1.7952	-2.5803
55312.5	55313.9	55313.5	55317.3	-4.7962	-3.3734	-3.7744	-1.1622	0.0436	-1.7974	-2.5877
55312.5	55313.9	55313.5	55317.3	-4.7968	-3.3736	-3.776	-1.1628	0.0434	-1.799	-2.5949
55312.5	55313.9	55313.5	55317.3	-4.7976	-3.3754	-3.776	-1.1636	0.0416	-1.799	-2.6019
55312.5	55313.9	55313.5	55317.3	-4.7984	-3.377	-3.7762	-1.1644	0.04	-1.7992	-2.6093
55312.5	55313.9	55313.5	55317.3	-4.796	-3.3758	-3.7758	-1.162	0.0412	-1.7988	-2.6153
55312.5	55313.9	55313.5	55317.3	-4.793	-3.3742	-3.7746	-1.159	0.0428	-1.7976	-2.6217
55312.5	55313.9	55313.5	55317.2	-4.793	-3.3742	-3.773	-1.159	0.0428	-1.796	-2.6293
55312.5	55313.9	55313.5	55317.2	-4.7944	-3.375	-3.7732	-1.1604	0.042	-1.7962	-2.6349
55312.4	55313.9	55313.5	55317.2	-4.7964	-3.3758	-3.7756	-1.1624	0.0412	-1.7986	-2.6383
55312.4	55313.9	55313.5	55317.2	-4.797	-3.378	-3.7788	-1.163	0.039	-1.8018	-2.6385
55312.4	55313.9	55313.5	55317.2	-4.7954	-3.3796	-3.7786	-1.1614	0.0374	-1.8016	-2.6377
55312.4	55313.9	55313.5	55317.2	-4.7948	-3.3802	-3.7772	-1.1608	0.0368	-1.8002	-2.6383
55312.4	55313.9	55313.5	55317.2	-4.7946	-3.3782	-3.7758	-1.1606	0.0388	-1.7988	-2.6383
55312.4	55313.9	55313.5	55317.2	-4.795	-3.3758	-3.7758	-1.161	0.0412	-1.7988	-2.6371
55312.5	55313.9	55313.5	55317.2	-4.7968	-3.377	-3.7768	-1.1628	0.04	-1.7998	-2.6353
55312.5	55313.9	55313.5	55317.3	-4.797	-3.3786	-3.778	-1.163	0.0384	-1.801	-2.6319
55312.5	55313.9	55313.5	55317.3	-4.7976	-3.3796	-3.7792	-1.1636	0.0374	-1.8022	-2.6297
55312.5	55313.9	55313.5	55317.3	-4.7988	-3.3796	-3.7802	-1.1648	0.0374	-1.8032	-2.6287
55312.5	55313.9	55313.5	55317.3	-4.7996	-3.3788	-3.7792	-1.1656	0.0382	-1.8022	-2.6287
55312.5	55313.9	55313.5	55317.3	-4.8008	-3.3782	-3.7776	-1.1668	0.0388	-1.8006	-2.6303
55312.5	55313.9	55313.5	55317.3	-4.7998	-3.3766	-3.7758	-1.1658	0.0404	-1.7988	-2.6321
55312.5	55313.9	55313.5	55317.2	-4.799	-3.3762	-3.7768	-1.165	0.0408	-1.7998	-2.6349
55312.4	55313.9	55313.5	55317.2	-4.7982	-3.378	-3.7782	-1.1642	0.039	-1.8012	-2.6399
55312.4	55313.9	55313.5	55317.2	-4.7964	-3.3786	-3.7754	-1.1624	0.0384	-1.7984	-2.6489
55312.4	55313.8	55313.4	55317.2	-4.7946	-3.3786	-3.7732	-1.1606	0.0384	-1.7962	-2.6597
55312.4	55313.8	55313.4	55317.2	-4.795	-3.3782	-3.7744	-1.161	0.0388	-1.7974	-2.6729
55312.4	55313.8	55313.4	55317.2	-4.797	-3.3786	-3.7774	-1.163	0.0384	-1.8004	-2.6875
55312.4	55313.8	55313.4	55317.2	-4.8	-3.3806	-3.7792	-1.166	0.0364	-1.8022	-2.7035
55312.4	55313.8	55313.4	55317.2	-4.801	-3.3804	-3.7784	-1.167	0.0366	-1.8014	-2.7197
55312.4	55313.8	55313.4	55317.2	-4.8	-3.3802	-3.7786	-1.166	0.0368	-1.8016	-2.7335
55312.3	55313.8	55313.4	55317.1	-4.7984	-3.3804	-3.779	-1.1644	0.0366	-1.802	-2.7447
55312.3	55313.7	55313.4	55317.1	-4.797	-3.379	-3.7768	-1.163	0.038	-1.7998	-2.7549
55312.3	55313.7	55313.3	55317.1	-4.7958	-3.3776	-3.7744	-1.1618	0.0394	-1.7974	-2.7617
55312.3	55313.7	55313.3	55317.1	-4.796	-3.3774	-3.7756	-1.162	0.0396	-1.7986	-2.7659
55312.3	55313.7	55313.3	55317.1	-4.7972	-3.3778	-3.7776	-1.1632	0.0392	-1.8006	-2.7693
55312.3	55313.7	55313.3	55317.1	-4.7986	-3.379	-3.7784	-1.1646	0.038	-1.8014	-2.7721
55312.3	55313.7	55313.3	55317.1	-4.7998	-3.3798	-3.7778	-1.1658	0.0372	-1.8008	-2.7745
55312.3	55313.7	55313.3	55317.1	-4.7998	-3.3806	-3.777	-1.1658	0.0364	-1.8	-2.7747
55312.3	55313.7	55313.3	55317.1	-4.7988	-3.3798	-3.7756	-1.1648	0.0372	-1.7986	-2.7735
55312.3	55313.7	55313.3	55317.1	-4.799	-3.3784	-3.7744	-1.165	0.0386	-1.7974	-2.7717
55312.3	55313.7	55313.3	55317.1	-4.7996	-3.3778	-3.7748	-1.1656	0.0392	-1.7978	-2.7671
55312.3	55313.7	55313.3	55317.1	-4.7996	-3.3802	-3.7776	-1.1656	0.0368	-1.8006	-2.7589
55312.3	55313.8	55313.4	55317.1	-4.7982	-3.383	-3.7792	-1.1642	0.034	-1.8022	-2.7487
55312.3	55313.8	55313.4	55317.1	-4.7972	-3.3832	-3.7784	-1.1632	0.0338	-1.8014	-2.7393
55312.4	55313.8	55313.4	55317.2	-4.798	-3.3818	-3.778	-1.164	0.0352	-1.801	-2.7309
55312.4	55313.8	55313.4	55317.2	-4.799	-3.3808	-3.7784	-1.165	0.0362	-1.8014	-2.7215
55312.4	55313.8	55313.4	55317.2	-4.7982	-3.38	-3.7782	-1.1642	0.037	-1.8012	-2.7111
55312.4	55313.8	55313.4	55317.2	-4.7984	-3.3802	-3.7772	-1.1644	0.0368	-1.8002	-2.7015
55312.4	55313.8	55313.4	55317.2	-4.7998	-3.3802	-3.777	-1.1658	0.0368	-1.8	-2.6917
55312.4	55313.8	55313.4	55317.2	-4.8016	-3.3794	-3.7776	-1.1676	0.0376	-1.8006	-2.6811
55312.4	55313.8	55313.4	55317.2	-4.8024	-3.3796	-3.7782	-1.1684	0.0374	-1.8012	-2.6677
55312.4	55313.9	55313.5	55317.2	-4.8026	-3.3808	-3.7782	-1.1686	0.0362	-1.8012	-2.6529
55312.4	55313.9	55313.5	55317.2	-4.8024	-3.3822	-3.7786	-1.1684	0.0348	-1.8016	-2.6381
55312.5	55313.9	55313.5	55317.3	-4.8022	-3.3822	-3.778	-1.1682	0.0348	-1.801	-2.6253
55312.5	55313.9	55313.5	55317.3	-4.8014	-3.3822	-3.7788	-1.1674	0.0348	-1.8018	-2.6127
55312.5	55313.9	55313.5	55317.3	-4.8012	-3.3844	-3.78	-1.1672	0.0326	-1.803	-2.5995
55312.5	55313.9	55313.5	55317.3	-4.8024	-3.3864	-3.7808	-1.1684	0.0306	-1.8038	-2.5869
55312.5	55313.9	55313.5	55317.3	-4.803	-3.3848	-3.7792	-1.169	0.0322	-1.8022	-2.5755
55312.5	55313.9	55313.5	55317.3	-4.801	-3.3796	-3.7756	-1.167	0.0374	-1.7986	-2.5631
55312.5	55314	55313.6	55317.3	-4.799	-3.3758	-3.7756	-1.165	0.0412	-1.7986	-2.5491
55312.6	55314	55313.6	55317.3	-4.7966	-3.3752	-3.7786	-1.1626	0.0418	-1.8016	-2.5329
55312.6	55314	55313.6	55317.4	-4.796	-3.3776	-3.781	-1.162	0.0394	-1.804	-2.5181
55312.6	55314	55313.6	55317.4	-4.7968	-3.3796	-3.78	-1.1628	0.0374	-1.803	-2.5059
55312.6	55314	55313.6	55317.4	-4.7972	-3.3806	-3.7782	-1.1632	0.0364	-1.8012	-2.4935
55312.6	55314	55313.6	55317.4	-4.7966	-3.38	-3.7768	-1.1626	0.037	-1.7998	-2.4803
55312.6	55314	55313.6	55317.4	-4.797	-3.3792	-3.7768	-1.163	0.0378	-1.7998	-2.4683
55312.6	55314	55313.6	55317.4	-4.7984	-3.3794	-3.7774	-1.1644	0.0376	-1.8004	-2.4579
55312.6	55314.1	55313.7	55317.4	-4.8014	-3.381	-3.7794	-1.1674	0.036	-1.8024	-2.4491
55312.6	55314.1	55313.7	55317.4	-4.802	-3.38	-3.778	-1.168	0.037	-1.801	-2.4401
55312.7	55314.1	55313.7	55317.5	-4.8008	-3.3782	-3.7766	-1.1668	0.0388	-1.7996	-2.4303
55312.7	55314.1	55313.7	55317.5	-4.8004	-3.3776	-3.7766	-1.1664	0.0394	-1.7996	-2.4217
55312.7	55314.1	55313.7	55317.5	-4.8032	-3.38	-3.7794	-1.1692	0.037	-1.8024	-2.4159
55312.7	55314.1	55313.7	55317.5	-4.804	-3.3822	-3.7812	-1.17	0.0348	-1.8042	-2.4113
55312.7	55314.1	55313.7	55317.5	-4.801	-3.3816	-3.7796	-1.167	0.0354	-1.8026	-2.4067
55312.7	55314.1	55313.7	55317.5	-4.7976	-3.38	-3.777	-1.1636	0.037	-1.8	-2.4025
55312.7	55314.1	55313.7	55317.5	-4.7986	-3.3806	-3.776	-1.1646	0.0364	-1.799	-2.4009
55312.7	55314.1	55313.7	55317.5	-4.8016	-3.3822	-3.7756	-1.1676	0.0348	-1.7986	-2.4013
55312.7	55314.1	55313.7	55317.5	-4.8026	-3.382	-3.7748	-1.1686	0.035	-1.7978	-2.4013
55312.7	55314.1	55313.7	55317.5	-4.7996	-3.379	-3.7736	-1.1656	0.038	-1.7966	-2.3991
55312.7	55314.1	55313.7	55317.5	-4.7982	-3.3758	-3.772	-1.1642	0.0412	-1.795	-2.3981
55312.7	55314.1	55313.7	55317.5	-4.8	-3.3756	-3.7724	-1.166	0.0414	-1.7954	-2.3983
55312.7	55314.1	55313.7	55317.5	-4.8052	-3.3792	-3.7758	-1.1712	0.0378	-1.7988	-2.3995
55312.7	55314.1	55313.7	55317.5	-4.8078	-3.3826	-3.7792	-1.1738	0.0344	-1.8022	-2.3997
55312.7	55314.1	55313.7	55317.5	-4.805	-3.3818	-3.7788	-1.171	0.0352	-1.8018	-2.3983
55312.7	55314.1	55313.7	55317.5	-4.8	-3.3778	-3.7758	-1.166	0.0392	-1.7988	-2.3967
55312.7	55314.1	55313.7	55317.5	-4.799	-3.3768	-3.7758	-1.165	0.0402	-1.7988	-2.3961
55312.7	55314.1	55313.7	55317.5	-4.8014	-3.3796	-3.7784	-1.1674	0.0374	-1.8014	-2.3957
55312.7	55314.1	55313.7	55317.5	-4.8036	-3.3816	-3.7794	-1.1696	0.0354	-1.8024	-2.3963
55312.7	55314.1	55313.7	55317.5	-4.8036	-3.3822	-3.7786	-1.1696	0.0348	-1.8016	-2.3969
55312.7	55314.1	55313.7	55317.5	-4.8036	-3.3818	-3.7786	-1.1696	0.0352	-1.8016	-2.3973
55312.7	55314.1	55313.7	55317.5	-4.8044	-3.3806	-3.7794	-1.1704	0.0364	-1.8024	-2.3985
55312.7	55314.1	55313.7	55317.5	-4.8044	-3.3798	-3.7804	-1.1704	0.0372	-1.8034	-2.3995
55312.7	55314.1	55313.7	55317.5	-4.8022	-3.3792	-3.7788	-1.1682	0.0378	-1.8018	-2.3999
55312.7	55314.1	55313.7	55317.5	-4.8016	-3.38	-3.7784	-1.1676	0.037	-1.8014	-2.4011
55312.7	55314.1	55313.7	55317.5	-4.8034	-3.3824	-3.78	-1.1694	0.0346	-1.803	-2.4029
55312.7	55314.1	55313.7	55317.5	-4.8062	-3.3834	-3.782	-1.1722	0.0336	-1.805	-2.4063
55312.7	55314.1	55313.7	55317.5	-4.8078	-3.3816	-3.7812	-1.1738	0.0354	-1.8042	-2.4115
55312.7	55314.1	55313.7	55317.5	-4.8042	-3.3784	-3.777	-1.1702	0.0386	-1.8	-2.4143
55312.7	55314.1	55313.7	55317.5	-4.7994	-3.3754	-3.7732	-1.1654	0.0416	-1.7962	-2.4159
55312.7	55314.1	55313.7	55317.5	-4.7996	-3.375	-3.7758	-1.1656	0.042	-1.7988	-2.4191
55312.7	55314.1	55313.7	55317.5	-4.8026	-3.3776	-3.781	-1.1686	0.0394	-1.804	-2.4233
55312.7	55314.1	55313.7	55317.5	-4.8056	-3.379	-3.783	-1.1716	0.038	-1.806	-2.4297
55312.6	55314.1	55313.7	55317.5	-4.8066	-3.38	-3.7814	-1.1726	0.037	-1.8044	-2.4367
55312.6	55314.1	55313.7	55317.4	-4.8056	-3.3794	-3.778	-1.1716	0.0376	-1.801	-2.4429
55312.6	55314.1	55313.7	55317.4	-4.8058	-3.379	-3.7774	-1.1718	0.038	-1.8004	-2.4483
55312.6	55314.1	55313.7	55317.4	-4.8054	-3.3804	-3.7798	-1.1714	0.0366	-1.8028	-2.4505
55312.6	55314.1	55313.7	55317.4	-4.8038	-3.382	-3.7806	-1.1698	0.035	-1.8036	-2.4517
55312.6	55314.1	55313.7	55317.4	-4.803	-3.3822	-3.78	-1.169	0.0348	-1.803	-2.4555
55312.6	55314	55313.6	55317.4	-4.8038	-3.3832	-3.78	-1.1698	0.0338	-1.803	-2.4605
55312.6	55314	55313.6	55317.4	-4.8052	-3.3832	-3.78	-1.1712	0.0338	-1.803	-2.4649
55312.6	55314	55313.6	55317.4	-4.8074	-3.3836	-3.7806	-1.1734	0.0334	-1.8036	-2.4691
55312.6	55314	55313.6	55317.4	-4.8092	-3.3832	-3.7804	-1.1752	0.0338	-1.8034	-2.4739
55312.6	55314	55313.6	55317.4	-4.81	-3.3822	-3.7802	-1.176	0.0348	-1.8032	-2.4789
55312.6	55314	55313.6	55317.4	-4.8078	-3.3802	-3.779	-1.1738	0.0368	-1.802	-2.4817
55312.6	55314	55313.6	55317.4	-4.8028	-3.378	-3.7768	-1.1688	0.039	-1.7998	-2.4813
55312.6	55314	55313.6	55317.4	-4.7996	-3.3766	-3.7748	-1.1656	0.0404	-1.7978	-2.4821
55312.6	55314	55313.6	55317.4	-4.8	-3.3778	-3.7736	-1.166	0.0392	-1.7966	-2.4857
55312.6	55314	55313.6	55317.4	-4.8022	-3.3798	-3.7722	-1.1682	0.0372	-1.7952	-2.4901
55312.6	55314	55313.6	55317.4	-4.805	-3.3794	-3.7722	-1.171	0.0376	-1.7952	-2.4945
55312.6	55314	55313.6	55317.4	-4.8078	-3.3786	-3.7752	-1.1738	0.0384	-1.7982	-2.4983
55312.6	55314	55313.6	55317.4	-4.8094	-3.3796	-3.7806	-1.1754	0.0374	-1.8036	-2.5007
55312.6	55314	55313.6	55317.4	-4.8098	-3.3814	-3.7824	-1.1758	0.0356	-1.8054	-2.5033
55312.6	55314	55313.6	55317.4	-4.8074	-3.3816	-3.7788	-1.1734	0.0354	-1.8018	-2.5053
55312.6	55314	55313.6	55317.4	-4.8038	-3.3796	-3.7738	-1.1698	0.0374	-1.7968	-2.5079
55312.6	55314	55313.6	55317.4	-4.802	-3.378	-3.7724	-1.168	0.039	-1.7954	-2.5113
55312.6	55314	55313.6	55317.4	-4.802	-3.3784	-3.7736	-1.168	0.0386	-1.7966	-2.5143
55312.6	55314	55313.6	55317.4	-4.8042	-3.3802	-3.7746	-1.1702	0.0368	-1.7976	-2.5185
55312.6	55314	55313.6	55317.4	-4.8084	-3.383	-3.7752	-1.1744	0.034	-1.7982	-2.5251
55312.6	55314	55313.6	55317.4	-4.8116	-3.3864	-3.7766	-1.1776	0.0306	-1.7996	-2.5317
55312.5	55314	55313.6	55317.4	-4.8126	-3.388	-3.778	-1.1786	0.029	-1.801	-2.5383
55312.5	55314	55313.6	55317.4	-4.8092	-3.3856	-3.7774	-1.1752	0.0314	-1.8004	-2.5439
55312.5	55314	55313.6	55317.3	-4.8048	-3.3814	-3.7738	-1.1708	0.0356	-1.7968	-2.5507
55312.5	55314	55313.6	55317.3	-4.8038	-3.3786	-3.7714	-1.1698	0.0384	-1.7944	-2.5593
55312.5	55313.9	55313.6	55317.3	-4.8064	-3.38	-3.7724	-1.1724	0.037	-1.7954	-2.5675
55312.5	55313.9	55313.5	55317.3	-4.81	-3.3832	-3.7742	-1.176	0.0338	-1.7972	-2.5753
55312.5	55313.9	55313.5	55317.3	-4.8102	-3.384	-3.7756	-1.1762	0.033	-1.7986	-2.5825
55312.5	55313.9	55313.5	55317.3	-4.8074	-3.383	-3.7756	-1.1734	0.034	-1.7986	-2.5889
55312.5	55313.9	55313.5	55317.3	-4.8062	-3.3818	-3.7758	-1.1722	0.0352	-1.7988	-2.5963
55312.5	55313.9	55313.5	55317.3	-4.8082	-3.3824	-3.7776	-1.1742	0.0346	-1.8006	-2.6049
55312.5	55313.9	55313.5	55317.3	-4.81	-3.3826	-3.7766	-1.176	0.0344	-1.7996	-2.6149
55312.5	55313.9	55313.5	55317.3	-4.81	-3.3816	-3.7728	-1.176	0.0354	-1.7958	-2.6269
55312.4	55313.9	55313.5	55317.3	-4.8088	-3.3818	-3.7712	-1.1748	0.0352	-1.7942	-2.6391
55312.4	55313.9	55313.5	55317.2	-4.8082	-3.382	-3.7724	-1.1742	0.035	-1.7954	-2.6515
55312.4	55313.8	55313.5	55317.2	-4.808	-3.381	-3.775	-1.174	0.036	-1.798	-2.6643
55312.4	55313.8	55313.4	55317.2	-4.8078	-3.38	-3.775	-1.1738	0.037	-1.798	-2.6775
55312.4	55313.8	55313.4	55317.2	-4.8096	-3.3822	-3.7746	-1.1756	0.0348	-1.7976	-2.6917
55312.4	55313.8	55313.4	55317.2	-4.8118	-3.3852	-3.7772	-1.1778	0.0318	-1.8002	-2.7061
55312.4	55313.8	55313.4	55317.2	-4.8136	-3.3854	-3.7806	-1.1796	0.0316	-1.8036	-2.7219
55312.3	55313.8	55313.4	55317.2	-4.8134	-3.3824	-3.781	-1.1794	0.0346	-1.804	-2.7395
55312.3	55313.8	55313.4	55317.1	-4.8122	-3.3794	-3.7782	-1.1782	0.0376	-1.8012	-2.7581
55312.3	55313.7	55313.3	55317.1	-4.8118	-3.3796	-3.7754	-1.1778	0.0374	-1.7984	-2.7763
55312.3	55313.7	55313.3	55317.1	-4.8108	-3.3822	-3.7742	-1.1768	0.0348	-1.7972	-2.7927
55312.3	55313.7	55313.3	55317.1	-4.809	-3.3852	-3.7732	-1.175	0.0318	-1.7962	-2.8091
55312.3	55313.7	55313.3	55317.1	-4.809	-3.3866	-3.7726	-1.175	0.0304	-1.7956	-2.8287
55312.2	55313.7	55313.3	55317	-4.8104	-3.3864	-3.7732	-1.1764	0.0306	-1.7962	-2.8505
55312.2	55313.6	55313.2	55317	-4.812	-3.3852	-3.7744	-1.178	0.0318	-1.7974	-2.8735
55312.2	55313.6	55313.2	55317	-4.8126	-3.3852	-3.7762	-1.1786	0.0318	-1.7992	-2.8967
55312.2	55313.6	55313.2	55317	-4.8122	-3.3856	-3.7768	-1.1782	0.0314	-1.7998	-2.9221
55312.1	55313.6	55313.2	55316.9	-4.8106	-3.3842	-3.7754	-1.1766	0.0328	-1.7984	-2.9511
55312.1	55313.5	55313.1	55316.9	-4.8084	-3.3812	-3.7736	-1.1744	0.0358	-1.7966	-2.9823
55312.1	55313.5	55313.1	55316.9	-4.808	-3.3816	-3.7742	-1.174	0.0354	-1.7972	-3.0139
55312	55313.5	55313.1	55316.8	-4.8094	-3.3846	-3.7768	-1.1754	0.0324	-1.7998	-3.0463
55312	55313.4	55313	55316.8	-4.8122	-3.388	-3.7798	-1.1782	0.029	-1.8028	-3.0803
55312	55313.4	55313	55316.8	-4.8156	-3.3898	-3.7808	-1.1816	0.0272	-1.8038	-3.1167
55311.9	55313.4	55313	55316.7	-4.818	-3.389	-3.7796	-1.184	0.028	-1.8026	-3.1537
55311.9	55313.3	55312.9	55316.7	-4.8172	-3.3872	-3.777	-1.1832	0.0298	-1.8	-3.1879
55311.9	55313.3	55312.9	55316.7	-4.8146	-3.386	-3.7752	-1.1806	0.031	-1.7982	-3.2199
55311.8	55313.3	55312.9	55316.6	-4.8132	-3.3858	-3.776	-1.1792	0.0312	-1.799	-3.2521
55311.8	55313.2	55312.8	55316.6	-4.815	-3.3864	-3.7772	-1.181	0.0306	-1.8002	-3.2871
55311.8	55313.2	55312.8	55316.6	-4.8158	-3.3856	-3.7764	-1.1818	0.0314	-1.7994	-3.3231
55311.7	55313.2	55312.8	55316.5	-4.813	-3.3832	-3.7736	-1.179	0.0338	-1.7966	-3.3555
55311.7	55313.1	55312.7	55316.5	-4.8084	-3.3808	-3.771	-1.1744	0.0362	-1.794	-3.3843
55311.7	55313.1	55312.7	55316.5	-4.808	-3.3832	-3.773	-1.174	0.0338	-1.796	-3.4131
55311.6	55313.1	55312.7	55316.5	-4.8122	-3.3874	-3.7766	-1.1782	0.0296	-1.7996	-3.4459
55311.6	55313	55312.6	55316.4	-4.817	-3.3902	-3.7798	-1.183	0.0268	-1.8028	-3.4803
55311.6	55313	55312.6	55316.4	-4.8192	-3.3898	-3.7818	-1.1852	0.0272	-1.8048	-3.5113
55311.5	55313	55312.6	55316.4	-4.8184	-3.3862	-3.7808	-1.1844	0.0308	-1.8038	-3.5387
55311.5	55313	55312.6	55316.3	-4.8158	-3.3834	-3.7782	-1.1818	0.0336	-1.8012	-3.5651
55311.5	55312.9	55312.5	55316.3	-4.8134	-3.3826	-3.7748	-1.1794	0.0344	-1.7978	-3.5927
55311.5	55312.9	55312.5	55316.3	-4.8118	-3.3846	-3.7742	-1.1778	0.0324	-1.7972	-3.6201
55311.4	55312.9	55312.5	55316.3	-4.8116	-3.3882	-3.7766	-1.1776	0.0288	-1.7996	-3.6455
55311.4	55312.8	55312.4	55316.2	-4.8134	-3.39	-3.7774	-1.1794	0.027	-1.8004	-3.6723
55311.4	55312.8	55312.4	55316.2	-4.8162	-3.3894	-3.7746	-1.1822	0.0276	-1.7976	-3.7029
55311.4	55312.8	55312.4	55316.2	-4.8168	-3.3892	-3.7716	-1.1828	0.0278	-1.7946	-3.7329
55311.3	55312.8	55312.4	55316.1	-4.8142	-3.3878	-3.7704	-1.1802	0.0292	-1.7934	-3.7609
55311.3	55312.7	55312.3	55316.1	-4.8118	-3.3864	-3.7724	-1.1778	0.0306	-1.7954	-3.7883
55311.3	55312.7	55312.3	55316.1	-4.81	-3.3838	-3.7736	-1.176	0.0332	-1.7966	-3.8167
55311.2	55312.7	55312.3	55316	-4.8094	-3.3816	-3.7744	-1.1754	0.0354	-1.7974	-3.8457
55311.2	55312.6	55312.2	55316	-4.81	-3.3822	-3.776	-1.176	0.0348	-1.799	-3.8729
55311.2	55312.6	55312.2	55316	-4.8116	-3.3842	-3.7776	-1.1776	0.0328	-1.8006	-3.8989
55311.2	55312.6	55312.2	55316	-4.8142	-3.3858	-3.7774	-1.1802	0.0312	-1.8004	-3.9269
55311.1	55312.6	55312.2	55315.9	-4.8158	-3.3874	-3.7756	-1.1818	0.0296	-1.7986	-3.9547
55311.1	55312.5	55312.1	55315.9	-4.8152	-3.3872	-3.7736	-1.1812	0.0298	-1.7966	-3.9797
55311.1	55312.5	55312.1	55315.9	-4.8144	-3.3848	-3.773	-1.1804	0.0322	-1.796	-4.0013
55311.1	55312.5	55312.1	55315.9	-4.8154	-3.3832	-3.7744	-1.1814	0.0338	-1.7974	-4.0203
55311	55312.5	55312.1	55315.9	-4.8164	-3.3826	-3.7772	-1.1824	0.0344	-1.8002	-4.0367
55311	55312.5	55312.1	55315.9	-4.8178	-3.3858	-3.7804	-1.1838	0.0312	-1.8034	-4.0505
55311	55312.5	55312.1	55315.8	-4.817	-3.3888	-3.782	-1.183	0.0282	-1.805	-4.0607
55311	55312.4	55312.1	55315.8	-4.8164	-3.3888	-3.7806	-1.1824	0.0282	-1.8036	-4.0701
55311	55312.4	55312	55315.8	-4.8158	-3.3872	-3.778	-1.1818	0.0298	-1.801	-4.0781
55311	55312.4	55312	55315.8	-4.8156	-3.3858	-3.7776	-1.1816	0.0312	-1.8006	-4.0839
55311	55312.4	55312	55315.8	-4.815	-3.3858	-3.7784	-1.181	0.0312	-1.8014	-4.0863
55311	55312.4	55312	55315.8	-4.815	-3.3874	-3.7786	-1.181	0.0296	-1.8016	-4.0849
55311	55312.4	55312	55315.8	-4.8144	-3.3876	-3.7774	-1.1804	0.0294	-1.8004	-4.0803
55311	55312.4	55312	55315.8	-4.8126	-3.3858	-3.7762	-1.1786	0.0312	-1.7992	-4.0731
55311	55312.4	55312.1	55315.8	-4.8088	-3.382	-3.7758	-1.1748	0.035	-1.7988	-4.0641
55311	55312.5	55312.1	55315.8	-4.8078	-3.382	-3.7768	-1.1738	0.035	-1.7998	-4.0567
55311	55312.5	55312.1	55315.8	-4.8112	-3.3858	-3.7776	-1.1772	0.0312	-1.8006	-4.0541
55311	55312.5	55312.1	55315.8	-4.8166	-3.3888	-3.778	-1.1826	0.0282	-1.801	-4.0583
55311	55312.4	55312.1	55315.8	-4.8198	-3.3868	-3.7776	-1.1858	0.0302	-1.8006	-4.0685
55311	55312.4	55312	55315.8	-4.8192	-3.3832	-3.7766	-1.1852	0.0338	-1.7996	-4.0805
55311	55312.4	55312	55315.8	-4.8172	-3.3842	-3.7762	-1.1832	0.0328	-1.7992	-4.0937
55311	55312.4	55312	55315.8	-4.8168	-3.3896	-3.778	-1.1828	0.0274	-1.801	-4.1099
55311	55312.4	55312	55315.8	-4.817	-3.3924	-3.7794	-1.183	0.0246	-1.8024	-4.1303
55310.9	55312.4	55312	55315.7	-4.818	-3.3924	-3.78	-1.184	0.0246	-1.803	-4.1543
55310.9	55312.3	55311.9	55315.7	-4.8188	-3.3914	-3.781	-1.1848	0.0256	-1.804	-4.1779
55310.9	55312.3	55311.9	55315.7	-4.8186	-3.3906	-3.7812	-1.1846	0.0264	-1.8042	-4.1993
55310.9	55312.3	55311.9	55315.7	-4.8168	-3.389	-3.781	-1.1828	0.028	-1.804	-4.2187
55310.8	55312.3	55311.9	55315.7	-4.815	-3.3886	-3.7802	-1.181	0.0284	-1.8032	-4.2365
55310.8	55312.3	55311.9	55315.6	-4.8142	-3.389	-3.7788	-1.1802	0.028	-1.8018	-4.2521
55310.8	55312.2	55311.9	55315.6	-4.8162	-3.39	-3.778	-1.1822	0.027	-1.801	-4.2661
55310.8	55312.2	55311.8	55315.6	-4.8174	-3.3894	-3.7782	-1.1834	0.0276	-1.8012	-4.2759
55310.8	55312.2	55311.8	55315.6	-4.8174	-3.3876	-3.7792	-1.1834	0.0294	-1.8022	-4.2815
55310.8	55312.2	55311.8	55315.6	-4.8154	-3.3854	-3.7792	-1.1814	0.0316	-1.8022	-4.2829
55310.8	55312.2	55311.8	55315.6	-4.8132	-3.3848	-3.7766	-1.1792	0.0322	-1.7996	-4.2817
55310.8	55312.2	55311.8	55315.6	-4.8126	-3.3856	-3.7754	-1.1786	0.0314	-1.7984	-4.2795
55310.8	55312.2	55311.8	55315.6	-4.814	-3.3876	-3.7764	-1.18	0.0294	-1.7994	-4.2763
55310.8	55312.2	55311.9	55315.6	-4.8164	-3.3884	-3.779	-1.1824	0.0286	-1.802	-4.2711
55310.8	55312.3	55311.9	55315.6	-4.818	-3.3888	-3.7804	-1.184	0.0282	-1.8034	-4.2637
55310.8	55312.3	55311.9	55315.6	-4.8172	-3.3888	-3.779	-1.1832	0.0282	-1.802	-4.2545
55310.8	55312.3	55311.9	55315.7	-4.8166	-3.3896	-3.7766	-1.1826	0.0274	-1.7996	-4.2455
55310.8	55312.3	55311.9	55315.7	-4.8158	-3.388	-3.7748	-1.1818	0.029	-1.7978	-4.2367
55310.9	55312.3	55311.9	55315.7	-4.8132	-3.385	-3.7748	-1.1792	0.032	-1.7978	-4.2261
55310.9	55312.3	55311.9	55315.7	-4.8102	-3.3838	-3.7768	-1.1762	0.0332	-1.7998	-4.2141
55310.9	55312.3	55311.9	55315.7	-4.81	-3.3852	-3.7782	-1.176	0.0318	-1.8012	-4.2035
55310.9	55312.3	55311.9	55315.7	-4.8152	-3.3888	-3.7784	-1.1812	0.0282	-1.8014	-4.1971
55310.9	55312.3	55311.9	55315.7	-4.8208	-3.3922	-3.7786	-1.1868	0.0248	-1.8016	-4.1919
55310.9	55312.3	55311.9	55315.7	-4.822	-3.3916	-3.78	-1.188	0.0254	-1.803	-4.1839
55310.9	55312.3	55312	55315.7	-4.8198	-3.3894	-3.7808	-1.1858	0.0276	-1.8038	-4.1739
55310.9	55312.4	55312	55315.7	-4.817	-3.3872	-3.7802	-1.183	0.0298	-1.8032	-4.1643
55310.9	55312.4	55312	55315.7	-4.8154	-3.3876	-3.78	-1.1814	0.0294	-1.803	-4.1557
55310.9	55312.4	55312	55315.8	-4.814	-3.3896	-3.7806	-1.18	0.0274	-1.8036	-4.1467
55310.9	55312.4	55312	55315.8	-4.814	-3.3898	-3.7806	-1.18	0.0272	-1.8036	-4.1389
55311	55312.4	55312	55315.8	-4.816	-3.3886	-3.78	-1.182	0.0284	-1.803	-4.1325
55311	55312.4	55312	55315.8	-4.8184	-3.3874	-3.7794	-1.1844	0.0296	-1.8024	-4.1269
55311	55312.4	55312	55315.8	-4.8174	-3.3864	-3.7784	-1.1834	0.0306	-1.8014	-4.1187
55311	55312.4	55312	55315.8	-4.8144	-3.3856	-3.7762	-1.1804	0.0314	-1.7992	-4.1093
55311	55312.4	55312	55315.8	-4.8128	-3.3852	-3.7742	-1.1788	0.0318	-1.7972	-4.1021
55311	55312.4	55312	55315.8	-4.813	-3.387	-3.7746	-1.179	0.03	-1.7976	-4.0957
55311	55312.4	55312	55315.8	-4.8142	-3.3894	-3.7766	-1.1802	0.0276	-1.7996	-4.0895
55311	55312.4	55312	55315.8	-4.8158	-3.3896	-3.778	-1.1818	0.0274	-1.801	-4.0843
55311	55312.4	55312	55315.8	-4.8168	-3.3882	-3.778	-1.1828	0.0288	-1.801	-4.0799
55311	55312.4	55312	55315.8	-4.8152	-3.385	-3.7752	-1.1812	0.032	-1.7982	-4.0765
55311	55312.4	55312.1	55315.8	-4.8124	-3.3836	-3.7722	-1.1784	0.0334	-1.7952	-4.0737
55311	55312.4	55312.1	55315.8	-4.8128	-3.3848	-3.7714	-1.1788	0.0322	-1.7944	-4.0729
55311	55312.4	55312.1	55315.8	-4.8154	-3.3868	-3.7732	-1.1814	0.0302	-1.7962	-4.0739
55311	55312.4	55312.1	55315.8	-4.818	-3.3886	-3.7776	-1.184	0.0284	-1.8006	-4.0749
55311	55312.4	55312	55315.8	-4.8162	-3.3876	-3.779	-1.1822	0.0294	-1.802	-4.0737
55311	55312.4	55312	55315.8	-4.8136	-3.3858	-3.7766	-1.1796	0.0312	-1.7996	-4.0737
55311	55312.4	55312	55315.8	-4.8154	-3.387	-3.7752	-1.1814	0.03	-1.7982	-4.0771
55311	55312.4	55312	55315.8	-4.818	-3.3884	-3.7746	-1.184	0.0286	-1.7976	-4.0811
55311	55312.4	55312	55315.8	-4.8186	-3.3882	-3.7752	-1.1846	0.0288	-1.7982	-4.0845
55311	55312.4	55312	55315.8	-4.817	-3.387	-3.7762	-1.183	0.03	-1.7992	-4.0867
55311	55312.4	55312	55315.8	-4.816	-3.3876	-3.7776	-1.182	0.0294	-1.8006	-4.0881
55311	55312.4	55312	55315.8	-4.8178	-3.3904	-3.7804	-1.1838	0.0266	-1.8034	-4.0909
55311	55312.4	55312	55315.8	-4.8182	-3.3908	-3.7824	-1.1842	0.0262	-1.8054	-4.0933
55311	55312.4	55312	55315.8	-4.8146	-3.3868	-3.7796	-1.1806	0.0302	-1.8026	-4.0961
55311	55312.4	55312	55315.8	-4.8132	-3.3846	-3.7754	-1.1792	0.0324	-1.7984	-4.1021
55311	55312.4	55312	55315.8	-4.8142	-3.3852	-3.7742	-1.1802	0.0318	-1.7972	-4.1089
55311	55312.4	55312	55315.8	-4.817	-3.3876	-3.777	-1.183	0.0294	-1.8	-4.1151
55311	55312.4	55312	55315.8	-4.8198	-3.3902	-3.7806	-1.1858	0.0268	-1.8036	-4.1203
55311	55312.4	55312	55315.8	-4.8212	-3.392	-3.7812	-1.1872	0.025	-1.8042	-4.1253
55311	55312.4	55312	55315.8	-4.819	-3.3918	-3.7778	-1.185	0.0252	-1.8008	-4.1299
55311	55312.4	55312	55315.8	-4.8164	-3.3916	-3.7754	-1.1824	0.0254	-1.7984	-4.1335
55310.9	55312.4	55312	55315.8	-4.8138	-3.3908	-3.7752	-1.1798	0.0262	-1.7982	-4.1357
55310.9	55312.4	55312	55315.8	-4.814	-3.3896	-3.7768	-1.18	0.0274	-1.7998	-4.1391
55310.9	55312.4	55312	55315.8	-4.817	-3.3872	-3.7772	-1.183	0.0298	-1.8002	-4.1449
55310.9	55312.4	55312	55315.8	-4.8184	-3.3848	-3.776	-1.1844	0.0322	-1.799	-4.1499
55310.9	55312.4	55312	55315.8	-4.8186	-3.3856	-3.7752	-1.1846	0.0314	-1.7982	-4.1531
55310.9	55312.4	55312	55315.7	-4.8164	-3.388	-3.7754	-1.1824	0.029	-1.7984	-4.1545
55310.9	55312.4	55312	55315.7	-4.8136	-3.389	-3.7764	-1.1796	0.028	-1.7994	-4.1567
55310.9	55312.3	55312	55315.7	-4.8144	-3.3874	-3.7778	-1.1804	0.0296	-1.8008	-4.1633
55310.9	55312.3	55312	55315.7	-4.8156	-3.3854	-3.7778	-1.1816	0.0316	-1.8008	-4.1707
55310.9	55312.3	55311.9	55315.7	-4.8166	-3.386	-3.7766	-1.1826	0.031	-1.7996	-4.1773
55310.9	55312.3	55311.9	55315.7	-4.8162	-3.3872	-3.7744	-1.1822	0.0298	-1.7974	-4.1813
55310.9	55312.3	55311.9	55315.7	-4.8168	-3.3864	-3.774	-1.1828	0.0306	-1.797	-4.1863
55310.9	55312.3	55311.9	55315.7	-4.8172	-3.3848	-3.7756	-1.1832	0.0322	-1.7986	-4.1925
55310.9	55312.3	55311.9	55315.7	-4.817	-3.3846	-3.7784	-1.183	0.0324	-1.8014	-4.1993
55310.9	55312.3	55311.9	55315.7	-4.8162	-3.3868	-3.78	-1.1822	0.0302	-1.803	-4.2051
55310.9	55312.3	55311.9	55315.7	-4.8178	-3.3898	-3.78	-1.1838	0.0272	-1.803	-4.2117
55310.9	55312.3	55311.9	55315.7	-4.8184	-3.392	-3.7778	-1.1844	0.025	-1.8008	-4.2175
55310.9	55312.3	55311.9	55315.7	-4.8184	-3.3934	-3.7758	-1.1844	0.0236	-1.7988	-4.2235
55310.9	55312.3	55311.9	55315.7	-4.8166	-3.392	-3.7742	-1.1826	0.025	-1.7972	-4.2295
55310.8	55312.3	55311.9	55315.7	-4.8152	-3.3878	-3.7736	-1.1812	0.0292	-1.7966	-4.2367
55310.8	55312.3	55311.9	55315.7	-4.8126	-3.384	-3.7734	-1.1786	0.033	-1.7964	-4.2417
55310.8	55312.3	55311.9	55315.7	-4.811	-3.3832	-3.7744	-1.177	0.0338	-1.7974	-4.2453
55310.8	55312.3	55311.9	55315.6	-4.8132	-3.3866	-3.7764	-1.1792	0.0304	-1.7994	-4.2501
55310.8	55312.3	55311.9	55315.6	-4.819	-3.392	-3.78	-1.185	0.025	-1.803	-4.2575
55310.8	55312.2	55311.9	55315.6	-4.8226	-3.3964	-3.783	-1.1886	0.0206	-1.806	-4.2643
55310.8	55312.2	55311.9	55315.6	-4.8218	-3.396	-3.7834	-1.1878	0.021	-1.8064	-4.2693
55310.8	55312.2	55311.8	55315.6	-4.8182	-3.3926	-3.7816	-1.1842	0.0244	-1.8046	-4.2723
55310.8	55312.2	55311.8	55315.6	-4.8172	-3.3914	-3.78	-1.1832	0.0256	-1.803	-4.2763
55310.8	55312.2	55311.8	55315.6	-4.8188	-3.3944	-3.78	-1.1848	0.0226	-1.803	-4.2809
55310.8	55312.2	55311.8	55315.6	-4.8182	-3.3954	-3.7806	-1.1842	0.0216	-1.8036	-4.2853
55310.8	55312.2	55311.8	55315.6	-4.816	-3.3918	-3.7808	-1.182	0.0252	-1.8038	-4.2895
55310.8	55312.2	55311.8	55315.6	-4.8152	-3.3878	-3.7806	-1.1812	0.0292	-1.8036	-4.2939
55310.8	55312.2	55311.8	55315.6	-4.8164	-3.3888	-3.781	-1.1824	0.0282	-1.804	-4.2973
55310.8	55312.2	55311.8	55315.6	-4.8178	-3.3924	-3.7808	-1.1838	0.0246	-1.8038	-4.3003
55310.8	55312.2	55311.8	55315.6	-4.8192	-3.3948	-3.7802	-1.1852	0.0222	-1.8032	-4.3043
55310.8	55312.2	55311.8	55315.6	-4.82	-3.3934	-3.7784	-1.186	0.0236	-1.8014	-4.3089
55310.8	55312.2	55311.8	55315.6	-4.8224	-3.3912	-3.7784	-1.1884	0.0258	-1.8014	-4.3135
55310.8	55312.2	55311.8	55315.6	-4.8224	-3.389	-3.7786	-1.1884	0.028	-1.8016	-4.3161
55310.8	55312.2	55311.8	55315.6	-4.8188	-3.3878	-3.7784	-1.1848	0.0292	-1.8014	-4.3165
55310.8	55312.2	55311.8	55315.6	-4.8152	-3.3892	-3.7792	-1.1812	0.0278	-1.8022	-4.3171
55310.8	55312.2	55311.8	55315.6	-4.8148	-3.3932	-3.7818	-1.1808	0.0238	-1.8048	-4.3187
55310.8	55312.2	55311.8	55315.6	-4.8184	-3.3964	-3.7838	-1.1844	0.0206	-1.8068	-4.3225
55310.8	55312.2	55311.8	55315.6	-4.822	-3.3976	-3.7842	-1.188	0.0194	-1.8072	-4.3269
55310.8	55312.2	55311.8	55315.6	-4.8208	-3.3952	-3.7818	-1.1868	0.0218	-1.8048	-4.3301
55310.8	55312.2	55311.8	55315.6	-4.8184	-3.394	-3.7808	-1.1844	0.023	-1.8038	-4.3319
55310.8	55312.2	55311.8	55315.6	-4.8174	-3.3952	-3.7824	-1.1834	0.0218	-1.8054	-4.3329
55310.8	55312.2	55311.8	55315.6	-4.8198	-3.3972	-3.7846	-1.1858	0.0198	-1.8076	-4.3355
55310.7	55312.2	55311.8	55315.6	-4.8244	-3.3976	-3.7854	-1.1904	0.0194	-1.8084	-4.3409
55310.7	55312.2	55311.8	55315.6	-4.8256	-3.3968	-3.7842	-1.1916	0.0202	-1.8072	-4.3441
55310.7	55312.2	55311.8	55315.6	-4.8226	-3.3944	-3.7804	-1.1886	0.0226	-1.8034	-4.3449
55310.7	55312.2	55311.8	55315.6	-4.8206	-3.3938	-3.7782	-1.1866	0.0232	-1.8012	-4.3455
55310.7	55312.2	55311.8	55315.6	-4.822	-3.3958	-3.7794	-1.188	0.0212	-1.8024	-4.3473
55310.7	55312.2	55311.8	55315.6	-4.8248	-3.399	-3.7818	-1.1908	0.018	-1.8048	-4.3499
55310.7	55312.2	55311.8	55315.6	-4.823	-3.3998	-3.782	-1.189	0.0172	-1.805	-4.3501
55310.7	55312.2	55311.8	55315.6	-4.8182	-3.3974	-3.7802	-1.1842	0.0196	-1.8032	-4.3493
55310.7	55312.2	55311.8	55315.6	-4.817	-3.3954	-3.7804	-1.183	0.0216	-1.8034	-4.3509
55310.7	55312.2	55311.8	55315.6	-4.819	-3.396	-3.7814	-1.185	0.021	-1.8044	-4.3537
55310.7	55312.2	55311.8	55315.6	-4.821	-3.3978	-3.7824	-1.187	0.0192	-1.8054	-4.3561
55310.7	55312.1	55311.8	55315.5	-4.8232	-3.4002	-3.7828	-1.1892	0.0168	-1.8058	-4.3599
55310.7	55312.1	55311.8	55315.5	-4.8244	-3.4002	-3.7818	-1.1904	0.0168	-1.8048	-4.3647
55310.7	55312.1	55311.8	55315.5	-4.8248	-3.3982	-3.7812	-1.1908	0.0188	-1.8042	-4.3699
55310.7	55312.1	55311.8	55315.5	-4.8242	-3.397	-3.7808	-1.1902	0.02	-1.8038	-4.3735
55310.7	55312.1	55311.8	55315.5	-4.8232	-3.3968	-3.7798	-1.1892	0.0202	-1.8028	-4.3763
55310.7	55312.1	55311.7	55315.5	-4.8244	-3.3978	-3.7804	-1.1904	0.0192	-1.8034	-4.3797
55310.7	55312.1	55311.7	55315.5	-4.8254	-3.3974	-3.781	-1.1914	0.0196	-1.804	-4.3833
55310.7	55312.1	55311.7	55315.5	-4.8258	-3.3964	-3.783	-1.1918	0.0206	-1.806	-4.3857
55310.7	55312.1	55311.7	55315.5	-4.8262	-3.3974	-3.7856	-1.1922	0.0196	-1.8086	-4.3869
55310.7	55312.1	55311.7	55315.5	-4.8258	-3.3978	-3.7852	-1.1918	0.0192	-1.8082	-4.3873
55310.7	55312.1	55311.7	55315.5	-4.8254	-3.3974	-3.7826	-1.1914	0.0196	-1.8056	-4.3881
55310.7	55312.1	55311.7	55315.5	-4.825	-3.3968	-3.7822	-1.191	0.0202	-1.8052	-4.3873
55310.7	55312.1	55311.7	55315.5	-4.825	-3.3966	-3.7848	-1.191	0.0204	-1.8078	-4.3849
55310.7	55312.1	55311.7	55315.5	-4.8244	-3.3972	-3.7862	-1.1904	0.0198	-1.8092	-4.3815
55310.7	55312.1	55311.7	55315.5	-4.8238	-3.3984	-3.7848	-1.1898	0.0186	-1.8078	-4.3777
55310.7	55312.1	55311.8	55315.5	-4.8238	-3.3994	-3.7832	-1.1898	0.0176	-1.8062	-4.3735
55310.7	55312.1	55311.8	55315.5	-4.8252	-3.4006	-3.783	-1.1912	0.0164	-1.806	-4.3691
55310.7	55312.1	55311.8	55315.5	-4.8276	-3.4006	-3.7836	-1.1936	0.0164	-1.8066	-4.3641
55310.7	55312.2	55311.8	55315.6	-4.829	-3.399	-3.7844	-1.195	0.018	-1.8074	-4.3579
55310.7	55312.2	55311.8	55315.6	-4.8286	-3.3978	-3.7848	-1.1946	0.0192	-1.8078	-4.3499
55310.7	55312.2	55311.8	55315.6	-4.8278	-3.3988	-3.7854	-1.1938	0.0182	-1.8084	-4.3411
55310.8	55312.2	55311.8	55315.6	-4.8276	-3.4006	-3.7852	-1.1936	0.0164	-1.8082	-4.3329
55310.8	55312.2	55311.8	55315.6	-4.829	-3.4018	-3.7856	-1.195	0.0152	-1.8086	-4.3259
55310.8	55312.2	55311.8	55315.6	-4.831	-3.4026	-3.7882	-1.197	0.0144	-1.8112	-4.3189
55310.8	55312.2	55311.8	55315.6	-4.8314	-3.4024	-3.79	-1.1974	0.0146	-1.813	-4.3109
55310.8	55312.2	55311.8	55315.6	-4.8282	-3.4016	-3.789	-1.1942	0.0154	-1.812	-4.3021
55310.8	55312.2	55311.8	55315.6	-4.825	-3.4014	-3.7878	-1.191	0.0156	-1.8108	-4.2941
55310.8	55312.2	55311.8	55315.6	-4.8252	-3.401	-3.787	-1.1912	0.016	-1.81	-4.2887
55310.8	55312.2	55311.8	55315.6	-4.8286	-3.4008	-3.7874	-1.1946	0.0162	-1.8104	-4.2857
55310.8	55312.2	55311.8	55315.6	-4.8314	-3.3996	-3.7874	-1.1974	0.0174	-1.8104	-4.2831
55310.8	55312.2	55311.9	55315.6	-4.8302	-3.3966	-3.7848	-1.1962	0.0204	-1.8078	-4.2787
55310.8	55312.2	55311.9	55315.6	-4.8286	-3.3966	-3.7842	-1.1946	0.0204	-1.8072	-4.2729
55310.8	55312.2	55311.9	55315.6	-4.8296	-3.3996	-3.787	-1.1956	0.0174	-1.81	-4.2681
55310.8	55312.2	55311.9	55315.7	-4.832	-3.4018	-3.7912	-1.198	0.0152	-1.8142	-4.2659
55310.8	55312.3	55311.9	55315.7	-4.832	-3.4018	-3.7922	-1.198	0.0152	-1.8152	-4.2641
55310.8	55312.3	55311.9	55315.7	-4.8302	-3.4	-3.7884	-1.1962	0.017	-1.8114	-4.2619
55310.8	55312.3	55311.9	55315.7	-4.8292	-3.3988	-3.7866	-1.1952	0.0182	-1.8096	-4.2587
55310.8	55312.3	55311.9	55315.7	-4.8306	-3.4006	-3.7886	-1.1966	0.0164	-1.8116	-4.2557
55310.8	55312.3	55311.9	55315.7	-4.8328	-3.4034	-3.7906	-1.1988	0.0136	-1.8136	-4.2539
55310.8	55312.3	55311.9	55315.7	-4.8346	-3.4044	-3.791	-1.2006	0.0126	-1.814	-4.2527
55310.8	55312.3	55311.9	55315.7	-4.8348	-3.403	-3.7914	-1.2008	0.014	-1.8144	-4.2507
55310.8	55312.3	55311.9	55315.7	-4.8332	-3.4	-3.792	-1.1992	0.017	-1.815	-4.2469
55310.8	55312.3	55311.9	55315.7	-4.8304	-3.3998	-3.7916	-1.1964	0.0172	-1.8146	-4.2411
55310.9	55312.3	55311.9	55315.7	-4.8278	-3.4018	-3.791	-1.1938	0.0152	-1.814	-4.2347
55310.9	55312.3	55311.9	55315.7	-4.8286	-3.4038	-3.7916	-1.1946	0.0132	-1.8146	-4.2307
55310.9	55312.3	55311.9	55315.7	-4.833	-3.4046	-3.7938	-1.199	0.0124	-1.8168	-4.2301
55310.9	55312.3	55311.9	55315.7	-4.8368	-3.4042	-3.7944	-1.2028	0.0128	-1.8174	-4.2311
55310.9	55312.3	55311.9	55315.7	-4.836	-3.403	-3.7908	-1.202	0.014	-1.8138	-4.2315
55310.9	55312.3	55311.9	55315.7	-4.8312	-3.402	-3.7878	-1.1972	0.015	-1.8108	-4.2297
55310.9	55312.3	55311.9	55315.7	-4.8278	-3.4008	-3.788	-1.1938	0.0162	-1.811	-4.2285
55310.9	55312.3	55311.9	55315.7	-4.8314	-3.4016	-3.7912	-1.1974	0.0154	-1.8142	-4.2317
55310.8	55312.3	55311.9	55315.7	-4.8356	-3.4028	-3.793	-1.2016	0.0142	-1.816	-4.2363
55310.8	55312.3	55311.9	55315.7	-4.8352	-3.4036	-3.7916	-1.2012	0.0134	-1.8146	-4.2397
55310.8	55312.3	55311.9	55315.7	-4.8324	-3.4036	-3.79	-1.1984	0.0134	-1.813	-4.2433
55310.8	55312.3	55311.9	55315.7	-4.83	-3.4018	-3.7886	-1.196	0.0152	-1.8116	-4.2479
55310.8	55312.3	55311.9	55315.7	-4.8296	-3.3992	-3.7876	-1.1956	0.0178	-1.8106	-4.2543
55310.8	55312.3	55311.9	55315.7	-4.83	-3.3992	-3.7892	-1.196	0.0178	-1.8122	-4.2601
55310.8	55312.2	55311.9	55315.7	-4.8312	-3.401	-3.793	-1.1972	0.016	-1.816	-4.2659
55310.8	55312.2	55311.9	55315.6	-4.8338	-3.4038	-3.7956	-1.1998	0.0132	-1.8186	-4.2725
55310.8	55312.2	55311.8	55315.6	-4.8344	-3.4044	-3.7948	-1.2004	0.0126	-1.8178	-4.2773
55310.8	55312.2	55311.8	55315.6	-4.8326	-3.4028	-3.7926	-1.1986	0.0142	-1.8156	-4.2797
55310.8	55312.2	55311.8	55315.6	-4.831	-3.401	-3.7924	-1.197	0.016	-1.8154	-4.2811
55310.8	55312.2	55311.8	55315.6	-4.8314	-3.401	-3.7938	-1.1974	0.016	-1.8168	-4.2825
55310.8	55312.2	55311.8	55315.6	-4.8324	-3.401	-3.7932	-1.1984	0.016	-1.8162	-4.2839
55310.8	55312.2	55311.8	55315.6	-4.8306	-3.4	-3.7908	-1.1966	0.017	-1.8138	-4.2819
55310.8	55312.2	55311.8	55315.6	-4.8282	-3.3984	-3.7898	-1.1942	0.0186	-1.8128	-4.2771
55310.8	55312.2	55311.9	55315.6	-4.8268	-3.3986	-3.7914	-1.1928	0.0184	-1.8144	-4.2703
55310.8	55312.2	55311.9	55315.6	-4.8282	-3.4014	-3.7944	-1.1942	0.0156	-1.8174	-4.2643
55310.8	55312.3	55311.9	55315.7	-4.8316	-3.4048	-3.7966	-1.1976	0.0122	-1.8196	-4.2605
55310.8	55312.3	55311.9	55315.7	-4.8344	-3.405	-3.7958	-1.2004	0.012	-1.8188	-4.2589
55310.8	55312.3	55311.9	55315.7	-4.8344	-3.4018	-3.793	-1.2004	0.0152	-1.816	-4.2567
55310.8	55312.3	55311.9	55315.7	-4.8314	-3.3986	-3.7906	-1.1974	0.0184	-1.8136	-4.2529
55310.8	55312.3	55311.9	55315.7	-4.827	-3.3982	-3.7892	-1.193	0.0188	-1.8122	-4.2483
55310.8	55312.3	55311.9	55315.7	-4.826	-3.4004	-3.7902	-1.192	0.0166	-1.8132	-4.2469
55310.8	55312.3	55311.9	55315.7	-4.8272	-3.4026	-3.7908	-1.1932	0.0144	-1.8138	-4.2493
55310.8	55312.3	55311.9	55315.7	-4.829	-3.4026	-3.7898	-1.195	0.0144	-1.8128	-4.2559
55310.8	55312.2	55311.9	55315.7	-4.8294	-3.4018	-3.7896	-1.1954	0.0152	-1.8126	-4.2647
55310.8	55312.2	55311.8	55315.6	-4.8286	-3.3998	-3.7908	-1.1946	0.0172	-1.8138	-4.2757
55310.8	55312.2	55311.8	55315.6	-4.8266	-3.3982	-3.7912	-1.1926	0.0188	-1.8142	-4.2871
55310.8	55312.2	55311.8	55315.6	-4.8256	-3.3982	-3.79	-1.1916	0.0188	-1.813	-4.3009
55310.8	55312.2	55311.8	55315.6	-4.823	-3.3986	-3.787	-1.189	0.0184	-1.81	-4.3165
55310.7	55312.2	55311.8	55315.6	-4.8218	-3.3988	-3.7856	-1.1878	0.0182	-1.8086	-4.3361
55310.7	55312.1	55311.8	55315.5	-4.8238	-3.399	-3.7872	-1.1898	0.018	-1.8102	-4.3607
55310.7	55312.1	55311.7	55315.5	-4.8266	-3.3976	-3.7886	-1.1926	0.0194	-1.8116	-4.3881
55310.7	55312.1	55311.7	55315.5	-4.8282	-3.3974	-3.7892	-1.1942	0.0196	-1.8122	-4.4141
55310.6	55312.1	55311.7	55315.5	-4.829	-3.3984	-3.7896	-1.195	0.0186	-1.8126	-4.4385
55310.6	55312.1	55311.7	55315.5	-4.8272	-3.3974	-3.7892	-1.1932	0.0196	-1.8122	-4.4607
55310.6	55312	55311.6	55315.4	-4.8246	-3.395	-3.7882	-1.1906	0.022	-1.8112	-4.4831
55310.6	55312	55311.6	55315.4	-4.8218	-3.392	-3.7868	-1.1878	0.025	-1.8098	-4.5065
55310.6	55312	55311.6	55315.4	-4.8206	-3.391	-3.7864	-1.1866	0.026	-1.8094	-4.5305
55310.5	55312	55311.6	55315.4	-4.821	-3.393	-3.7876	-1.187	0.024	-1.8106	-4.5537
55310.5	55311.9	55311.5	55315.3	-4.8234	-3.3956	-3.7892	-1.1894	0.0214	-1.8122	-4.5773
55310.5	55311.9	55311.5	55315.3	-4.8246	-3.3968	-3.7878	-1.1906	0.0202	-1.8108	-4.6013
55310.5	55311.9	55311.5	55315.3	-4.8254	-3.3972	-3.7852	-1.1914	0.0198	-1.8082	-4.6267
55310.4	55311.9	55311.5	55315.3	-4.8252	-3.3968	-3.7846	-1.1912	0.0202	-1.8076	-4.6499
55310.4	55311.8	55311.5	55315.2	-4.8252	-3.3964	-3.7862	-1.1912	0.0206	-1.8092	-4.6707
55310.4	55311.8	55311.4	55315.2	-4.8262	-3.3966	-3.7884	-1.1922	0.0204	-1.8114	-4.6915
55310.4	55311.8	55311.4	55315.2	-4.8272	-3.3956	-3.7884	-1.1932	0.0214	-1.8114	-4.7149
55310.3	55311.8	55311.4	55315.2	-4.8264	-3.3946	-3.7862	-1.1924	0.0224	-1.8092	-4.7379
55310.3	55311.8	55311.4	55315.2	-4.8256	-3.3958	-3.7862	-1.1916	0.0212	-1.8092	-4.7583
55310.3	55311.7	55311.3	55315.1	-4.8248	-3.3992	-3.787	-1.1908	0.0178	-1.81	-4.7765
55310.3	55311.7	55311.3	55315.1	-4.8258	-3.403	-3.7886	-1.1918	0.014	-1.8116	-4.7963
55310.3	55311.7	55311.3	55315.1	-4.8274	-3.4034	-3.7902	-1.1934	0.0136	-1.8132	-4.8171
55310.2	55311.7	55311.3	55315.1	-4.8286	-3.3998	-3.7902	-1.1946	0.0172	-1.8132	-4.8373
55310.2	55311.7	55311.3	55315.1	-4.828	-3.3964	-3.79	-1.194	0.0206	-1.813	-4.8537
55310.2	55311.7	55311.3	55315	-4.8256	-3.3952	-3.79	-1.1916	0.0218	-1.813	-4.8649
55310.2	55311.6	55311.2	55315	-4.8242	-3.3964	-3.7906	-1.1902	0.0206	-1.8136	-4.8725
55310.2	55311.6	55311.2	55315	-4.8236	-3.3978	-3.7904	-1.1896	0.0192	-1.8134	-4.8771
55310.2	55311.6	55311.2	55315	-4.8238	-3.3974	-3.7868	-1.1898	0.0196	-1.8098	-4.8807
55310.2	55311.6	55311.2	55315	-4.8254	-3.3974	-3.784	-1.1914	0.0196	-1.807	-4.8827
55310.2	55311.6	55311.2	55315	-4.8276	-3.3998	-3.7872	-1.1936	0.0172	-1.8102	-4.8803
55310.2	55311.6	55311.2	55315	-4.829	-3.4024	-3.7926	-1.195	0.0146	-1.8156	-4.8743
55310.2	55311.6	55311.3	55315	-4.8282	-3.4032	-3.7936	-1.1942	0.0138	-1.8166	-4.8675
55310.2	55311.6	55311.3	55315	-4.8244	-3.4014	-3.7888	-1.1904	0.0156	-1.8118	-4.8609
55310.2	55311.7	55311.3	55315.1	-4.8232	-3.4004	-3.785	-1.1892	0.0166	-1.808	-4.8559
55310.2	55311.7	55311.3	55315.1	-4.8242	-3.4018	-3.7876	-1.1902	0.0152	-1.8106	-4.8503
55310.2	55311.7	55311.3	55315.1	-4.8254	-3.4024	-3.791	-1.1914	0.0146	-1.814	-4.8461
55310.2	55311.7	55311.3	55315.1	-4.8252	-3.4002	-3.79	-1.1912	0.0168	-1.813	-4.8463
55310.2	55311.7	55311.3	55315.1	-4.8242	-3.3972	-3.7858	-1.1902	0.0198	-1.8088	-4.8501
55310.2	55311.7	55311.3	55315.1	-4.825	-3.3978	-3.7848	-1.191	0.0192	-1.8078	-4.8553
55310.2	55311.7	55311.3	55315.1	-4.827	-3.4014	-3.7886	-1.193	0.0156	-1.8116	-4.8609
55310.2	55311.6	55311.3	55315	-4.8262	-3.4034	-3.7942	-1.1922	0.0136	-1.8172	-4.8671
55310.2	55311.6	55311.2	55315	-4.8232	-3.4024	-3.7964	-1.1892	0.0146	-1.8194	-4.8761
55310.2	55311.6	55311.2	55315	-4.8202	-3.4004	-3.7946	-1.1862	0.0166	-1.8176	-4.8893
55310.2	55311.6	55311.2	55315	-4.8204	-3.3988	-3.791	-1.1864	0.0182	-1.814	-4.9073
55310.2	55311.6	55311.2	55315	-4.8232	-3.3988	-3.789	-1.1892	0.0182	-1.812	-4.9291
55310.1	55311.6	55311.2	55315	-4.8254	-3.4	-3.7874	-1.1914	0.017	-1.8104	-4.9539
55310.1	55311.5	55311.1	55314.9	-4.8278	-3.4014	-3.7876	-1.1938	0.0156	-1.8106	-4.9819
55310.1	55311.5	55311.1	55314.9	-4.8298	-3.4028	-3.7888	-1.1958	0.0142	-1.8118	-5.0111
55310	55311.5	55311.1	55314.9	-4.83	-3.4032	-3.791	-1.196	0.0138	-1.814	-5.0389
55310	55311.4	55311.1	55314.8	-4.829	-3.4032	-3.7936	-1.195	0.0138	-1.8166	-5.0663
55310	55311.4	55311	55314.8	-4.828	-3.4026	-3.7932	-1.194	0.0144	-1.8162	-5.0975
55310	55311.4	55311	55314.8	-4.828	-3.4024	-3.7916	-1.194	0.0146	-1.8146	-5.1333
55309.9	55311.3	55311	55314.7	-4.8282	-3.4026	-3.792	-1.1942	0.0144	-1.815	-5.1707
55309.9	55311.3	55310.9	55314.7	-4.8268	-3.4028	-3.7914	-1.1928	0.0142	-1.8144	-5.2075
55309.8	55311.3	55310.9	55314.7	-4.8258	-3.4028	-3.7904	-1.1918	0.0142	-1.8134	-5.2445
55309.8	55311.2	55310.8	55314.6	-4.8274	-3.4024	-3.789	-1.1934	0.0146	-1.812	-5.2837
55309.8	55311.2	55310.8	55314.6	-4.8282	-3.4028	-3.789	-1.1942	0.0142	-1.812	-5.3211
55309.7	55311.2	55310.8	55314.6	-4.827	-3.403	-3.79	-1.193	0.014	-1.813	-5.3553
55309.7	55311.1	55310.7	55314.5	-4.8252	-3.4026	-3.7912	-1.1912	0.0144	-1.8142	-5.3873
55309.7	55311.1	55310.7	55314.5	-4.8242	-3.4014	-3.791	-1.1902	0.0156	-1.814	-5.4187
55309.6	55311.1	55310.7	55314.5	-4.8252	-3.4	-3.7912	-1.1912	0.017	-1.8142	-5.4495
55309.6	55311	55310.6	55314.4	-4.827	-3.3994	-3.7916	-1.193	0.0176	-1.8146	-5.4775
55309.6	55311	55310.6	55314.4	-4.8274	-3.4	-3.7926	-1.1934	0.017	-1.8156	-5.4997
55309.6	55311	55310.6	55314.4	-4.827	-3.4014	-3.7946	-1.193	0.0156	-1.8176	-5.5165
55309.6	55311	55310.6	55314.4	-4.8256	-3.4018	-3.7956	-1.1916	0.0152	-1.8186	-5.5297
55309.5	55311	55310.6	55314.4	-4.8256	-3.402	-3.7948	-1.1916	0.015	-1.8178	-5.5397
55309.5	55311	55310.6	55314.4	-4.8274	-3.4038	-3.7954	-1.1934	0.0132	-1.8184	-5.5445
55309.5	55311	55310.6	55314.4	-4.8276	-3.4056	-3.7962	-1.1936	0.0114	-1.8192	-5.5417
55309.6	55311	55310.6	55314.4	-4.8272	-3.4074	-3.798	-1.1932	0.0096	-1.821	-5.5325
55309.6	55311	55310.6	55314.4	-4.8288	-3.408	-3.7988	-1.1948	0.009	-1.8218	-5.5213
55309.6	55311	55310.6	55314.4	-4.831	-3.408	-3.7988	-1.197	0.009	-1.8218	-5.5067
55309.6	55311	55310.6	55314.4	-4.8318	-3.4078	-3.7988	-1.1978	0.0092	-1.8218	-5.4859
55309.6	55311.1	55310.7	55314.5	-4.8302	-3.4058	-3.799	-1.1962	0.0112	-1.822	-5.4593
55309.7	55311.1	55310.7	55314.5	-4.828	-3.4034	-3.8004	-1.194	0.0136	-1.8234	-5.4289
55309.7	55311.1	55310.7	55314.5	-4.8286	-3.4032	-3.803	-1.1946	0.0138	-1.826	-5.3983
55309.7	55311.1	55310.7	55314.5	-4.8298	-3.4052	-3.804	-1.1958	0.0118	-1.827	-5.3669
55309.8	55311.2	55310.8	55314.6	-4.8288	-3.4068	-3.802	-1.1948	0.0102	-1.825	-5.3327
55309.8	55311.2	55310.8	55314.6	-4.827	-3.4072	-3.8004	-1.193	0.0098	-1.8234	-5.2971
55309.8	55311.2	55310.8	55314.7	-4.8262	-3.407	-3.8014	-1.1922	0.01	-1.8244	-5.2605
55309.9	55311.3	55310.9	55314.7	-4.827	-3.4068	-3.8046	-1.193	0.0102	-1.8276	-5.2239
55309.9	55311.3	55310.9	55314.7	-4.8274	-3.4052	-3.8054	-1.1934	0.0118	-1.8284	-5.1883
55309.9	55311.4	55311	55314.8	-4.8266	-3.4036	-3.8036	-1.1926	0.0134	-1.8266	-5.1537
55310	55311.4	55311	55314.8	-4.8256	-3.4044	-3.8036	-1.1916	0.0126	-1.8266	-5.1193
55310	55311.4	55311	55314.8	-4.826	-3.4066	-3.8048	-1.192	0.0104	-1.8278	-5.0871
55310	55311.4	55311	55314.9	-4.8262	-3.4062	-3.8042	-1.1922	0.0108	-1.8272	-5.0577
55310.1	55311.5	55311.1	55314.9	-4.8274	-3.4038	-3.803	-1.1934	0.0132	-1.826	-5.0315
55310.1	55311.5	55311.1	55314.9	-4.8284	-3.4036	-3.802	-1.1944	0.0134	-1.825	-5.0055
55310.1	55311.5	55311.1	55314.9	-4.8294	-3.4076	-3.8044	-1.1954	0.0094	-1.8274	-4.9783
55310.1	55311.6	55311.2	55315	-4.8302	-3.411	-3.808	-1.1962	0.006	-1.831	-4.9515
55310.2	55311.6	55311.2	55315	-4.83	-3.4094	-3.809	-1.196	0.0076	-1.832	-4.9257
55310.2	55311.6	55311.2	55315	-4.8282	-3.4044	-3.8056	-1.1942	0.0126	-1.8286	-4.9009
55310.2	55311.6	55311.2	55315	-4.827	-3.4012	-3.8016	-1.193	0.0158	-1.8246	-4.8769
55310.2	55311.7	55311.3	55315.1	-4.8252	-3.4016	-3.8006	-1.1912	0.0154	-1.8236	-4.8519
55310.3	55311.7	55311.3	55315.1	-4.8276	-3.4036	-3.8044	-1.1936	0.0134	-1.8274	-4.8295
55310.3	55311.7	55311.3	55315.1	-4.8304	-3.4054	-3.8088	-1.1964	0.0116	-1.8318	-4.8073
55310.3	55311.7	55311.3	55315.1	-4.8308	-3.4068	-3.8104	-1.1968	0.0102	-1.8334	-4.7839
55310.3	55311.7	55311.3	55315.2	-4.8282	-3.408	-3.8088	-1.1942	0.009	-1.8318	-4.7599
55310.3	55311.8	55311.4	55315.2	-4.826	-3.4074	-3.8058	-1.192	0.0096	-1.8288	-4.7377
55310.4	55311.8	55311.4	55315.2	-4.826	-3.4054	-3.8032	-1.192	0.0116	-1.8262	-4.7175
55310.4	55311.8	55311.4	55315.2	-4.828	-3.4038	-3.802	-1.194	0.0132	-1.825	-4.6979
55310.4	55311.8	55311.4	55315.2	-4.8286	-3.4054	-3.8026	-1.1946	0.0116	-1.8256	-4.6761
55310.4	55311.9	55311.5	55315.3	-4.8288	-3.4074	-3.8038	-1.1948	0.0096	-1.8268	-4.6543
55310.5	55311.9	55311.5	55315.3	-4.8282	-3.408	-3.8038	-1.1942	0.009	-1.8268	-4.6339
55310.5	55311.9	55311.5	55315.3	-4.8272	-3.4072	-3.8044	-1.1932	0.0098	-1.8274	-4.6139
55310.5	55311.9	55311.5	55315.3	-4.8258	-3.4054	-3.8044	-1.1918	0.0116	-1.8274	-4.5945
55310.5	55311.9	55311.5	55315.3	-4.8252	-3.4044	-3.8046	-1.1912	0.0126	-1.8276	-4.5761
55310.5	55311.9	55311.5	55315.4	-4.8252	-3.4056	-3.8042	-1.1912	0.0114	-1.8272	-4.5577
55310.5	55312	55311.6	55315.4	-4.8272	-3.4088	-3.8046	-1.1932	0.0082	-1.8276	-4.5399
55310.6	55312	55311.6	55315.4	-4.8284	-3.4102	-3.8056	-1.1944	0.0068	-1.8286	-4.5227
55310.6	55312	55311.6	55315.4	-4.8276	-3.408	-3.806	-1.1936	0.009	-1.829	-4.5059
55310.6	55312	55311.6	55315.4	-4.8258	-3.406	-3.8052	-1.1918	0.011	-1.8282	-4.4895
55310.6	55312	55311.6	55315.4	-4.8258	-3.4064	-3.8058	-1.1918	0.0106	-1.8288	-4.4749
55310.6	55312	55311.6	55315.5	-4.829	-3.4084	-3.8074	-1.195	0.0086	-1.8304	-4.4635
55310.6	55312.1	55311.7	55315.5	-4.8292	-3.4062	-3.8066	-1.1952	0.0108	-1.8296	-4.4513
55310.6	55312.1	55311.7	55315.5	-4.8266	-3.402	-3.8034	-1.1926	0.015	-1.8264	-4.4375
55310.7	55312.1	55311.7	55315.5	-4.8272	-3.4014	-3.8022	-1.1932	0.0156	-1.8252	-4.4245
55310.7	55312.1	55311.7	55315.5	-4.8294	-3.4042	-3.8034	-1.1954	0.0128	-1.8264	-4.4125
55310.7	55312.1	55311.7	55315.5	-4.8306	-3.4068	-3.8064	-1.1966	0.0102	-1.8294	-4.4009
55310.7	55312.1	55311.7	55315.5	-4.829	-3.4086	-3.8076	-1.195	0.0084	-1.8306	-4.3883
55310.7	55312.1	55311.7	55315.5	-4.8268	-3.4088	-3.8062	-1.1928	0.0082	-1.8292	-4.3763
55310.7	55312.1	55311.7	55315.5	-4.8272	-3.4082	-3.8046	-1.1932	0.0088	-1.8276	-4.3665
55310.7	55312.1	55311.8	55315.6	-4.8266	-3.4072	-3.8024	-1.1926	0.0098	-1.8254	-4.3557
55310.7	55312.2	55311.8	55315.6	-4.824	-3.4066	-3.801	-1.19	0.0104	-1.824	-4.3439
55310.8	55312.2	55311.8	55315.6	-4.8234	-3.4074	-3.802	-1.1894	0.0096	-1.825	-4.3331
55310.8	55312.2	55311.8	55315.6	-4.8254	-3.4084	-3.8046	-1.1914	0.0086	-1.8276	-4.3243
55310.8	55312.2	55311.8	55315.6	-4.8284	-3.4086	-3.806	-1.1944	0.0084	-1.829	-4.3163
55310.8	55312.2	55311.8	55315.6	-4.8296	-3.408	-3.805	-1.1956	0.009	-1.828	-4.3065
55310.8	55312.2	55311.8	55315.6	-4.8266	-3.4062	-3.8028	-1.1926	0.0108	-1.8258	-4.2933
55310.8	55312.2	55311.8	55315.6	-4.8254	-3.404	-3.802	-1.1914	0.013	-1.825	-4.2811
55310.8	55312.2	55311.8	55315.6	-4.8282	-3.404	-3.805	-1.1942	0.013	-1.828	-4.2703
55310.8	55312.3	55311.9	55315.7	-4.8314	-3.4062	-3.8066	-1.1974	0.0108	-1.8296	-4.2601
55310.8	55312.3	55311.9	55315.7	-4.8308	-3.4088	-3.8052	-1.1968	0.0082	-1.8282	-4.2477
55310.9	55312.3	55311.9	55315.7	-4.827	-3.4088	-3.8034	-1.193	0.0082	-1.8264	-4.2347
55310.9	55312.3	55311.9	55315.7	-4.825	-3.407	-3.8036	-1.191	0.01	-1.8266	-4.2245
55310.9	55312.3	55311.9	55315.7	-4.8262	-3.4062	-3.8054	-1.1922	0.0108	-1.8284	-4.2171
55310.9	55312.3	55311.9	55315.7	-4.8276	-3.4066	-3.8056	-1.1936	0.0104	-1.8286	-4.2101
55310.9	55312.3	55311.9	55315.7	-4.8264	-3.4062	-3.8018	-1.1924	0.0108	-1.8248	-4.2025
55310.9	55312.3	55311.9	55315.7	-4.8248	-3.4054	-3.7996	-1.1908	0.0116	-1.8226	-4.1947
55310.9	55312.3	55311.9	55315.7	-4.8238	-3.4056	-3.8008	-1.1898	0.0114	-1.8238	-4.1873
55310.9	55312.3	55311.9	55315.7	-4.8242	-3.4076	-3.8038	-1.1902	0.0094	-1.8268	-4.1809
55310.9	55312.3	55311.9	55315.7	-4.8252	-3.4084	-3.8044	-1.1912	0.0086	-1.8274	-4.1773
55310.9	55312.3	55311.9	55315.7	-4.8272	-3.4076	-3.8026	-1.1932	0.0094	-1.8256	-4.1775
55310.9	55312.3	55311.9	55315.7	-4.828	-3.4066	-3.8012	-1.194	0.0104	-1.8242	-4.1787
55310.9	55312.3	55311.9	55315.7	-4.8276	-3.407	-3.8028	-1.1936	0.01	-1.8258	-4.1791
55310.9	55312.3	55311.9	55315.7	-4.8246	-3.4066	-3.8038	-1.1906	0.0104	-1.8268	-4.1801
55310.9	55312.3	55311.9	55315.7	-4.8224	-3.4042	-3.803	-1.1884	0.0128	-1.826	-4.1865
55310.9	55312.3	55311.9	55315.7	-4.8218	-3.4014	-3.8008	-1.1878	0.0156	-1.8238	-4.1985
55310.9	55312.3	55311.9	55315.7	-4.8236	-3.401	-3.8004	-1.1896	0.016	-1.8234	-4.2129
55310.9	55312.3	55311.9	55315.7	-4.8262	-3.4052	-3.8032	-1.1922	0.0118	-1.8262	-4.2271
55310.8	55312.3	55311.9	55315.7	-4.8278	-3.4098	-3.8056	-1.1938	0.0072	-1.8286	-4.2423
55310.8	55312.2	55311.8	55315.7	-4.828	-3.411	-3.806	-1.194	0.006	-1.829	-4.2597
55310.8	55312.2	55311.8	55315.6	-4.8262	-3.4078	-3.8038	-1.1922	0.0092	-1.8268	-4.2787
55310.8	55312.2	55311.8	55315.6	-4.8242	-3.4044	-3.8012	-1.1902	0.0126	-1.8242	-4.2991
55310.8	55312.2	55311.8	55315.6	-4.8236	-3.4032	-3.8006	-1.1896	0.0138	-1.8236	-4.3213
55310.7	55312.2	55311.8	55315.6	-4.8236	-3.4034	-3.8006	-1.1896	0.0136	-1.8236	-4.3451
55310.7	55312.1	55311.7	55315.5	-4.8244	-3.4042	-3.8002	-1.1904	0.0128	-1.8232	-4.3699
55310.7	55312.1	55311.7	55315.5	-4.8266	-3.4072	-3.8016	-1.1926	0.0098	-1.8246	-4.3951
55310.7	55312.1	55311.7	55315.5	-4.8292	-3.41	-3.8036	-1.1952	0.007	-1.8266	-4.4209
55310.6	55312.1	55311.7	55315.5	-4.8302	-3.4096	-3.8048	-1.1962	0.0074	-1.8278	-4.4461
55310.6	55312	55311.6	55315.4	-4.8274	-3.4056	-3.8028	-1.1934	0.0114	-1.8258	-4.4691
55310.6	55312	55311.6	55315.4	-4.8246	-3.4032	-3.8008	-1.1906	0.0138	-1.8238	-4.4907
55310.6	55312	55311.6	55315.4	-4.825	-3.4056	-3.8018	-1.191	0.0114	-1.8248	-4.5121
55310.6	55312	55311.6	55315.4	-4.8262	-3.4082	-3.8048	-1.1922	0.0088	-1.8278	-4.5323
55310.5	55312	55311.6	55315.4	-4.8256	-3.4074	-3.8058	-1.1916	0.0096	-1.8288	-4.5503
55310.5	55311.9	55311.5	55315.3	-4.8228	-3.4048	-3.8048	-1.1888	0.0122	-1.8278	-4.5659
55310.5	55311.9	55311.5	55315.3	-4.8218	-3.4026	-3.8026	-1.1878	0.0144	-1.8256	-4.5829
55310.5	55311.9	55311.5	55315.3	-4.823	-3.4024	-3.8016	-1.189	0.0146	-1.8246	-4.6003
55310.5	55311.9	55311.5	55315.3	-4.824	-3.4034	-3.803	-1.19	0.0136	-1.826	-4.6157
55310.5	55311.9	55311.5	55315.3	-4.823	-3.4042	-3.8054	-1.189	0.0128	-1.8284	-4.6279
55310.4	55311.9	55311.5	55315.3	-4.823	-3.4046	-3.8064	-1.189	0.0124	-1.8294	-4.6395
55310.4	55311.9	55311.5	55315.3	-4.8258	-3.4066	-3.8064	-1.1918	0.0104	-1.8294	-4.6523
55310.4	55311.8	55311.4	55315.3	-4.8284	-3.4088	-3.8052	-1.1944	0.0082	-1.8282	-4.6633
55310.4	55311.8	55311.4	55315.2	-4.8272	-3.41	-3.8046	-1.1932	0.007	-1.8276	-4.6685
55310.4	55311.8	55311.4	55315.2	-4.8232	-3.4088	-3.804	-1.1892	0.0082	-1.827	-4.6703
55310.4	55311.8	55311.4	55315.2	-4.8206	-3.406	-3.8024	-1.1866	0.011	-1.8254	-4.6723
55310.4	55311.8	55311.4	55315.2	-4.8202	-3.4026	-3.8004	-1.1862	0.0144	-1.8234	-4.6751
55310.4	55311.8	55311.4	55315.2	-4.8194	-3.3998	-3.7998	-1.1854	0.0172	-1.8228	-4.6761
55310.4	55311.8	55311.4	55315.2	-4.8186	-3.3994	-3.8008	-1.1846	0.0176	-1.8238	-4.6735
55310.4	55311.8	55311.4	55315.2	-4.8204	-3.4006	-3.8028	-1.1864	0.0164	-1.8258	-4.6701
55310.4	55311.8	55311.4	55315.2	-4.8238	-3.403	-3.8042	-1.1898	0.014	-1.8272	-4.6665
55310.4	55311.8	55311.4	55315.2	-4.8256	-3.404	-3.8036	-1.1916	0.013	-1.8266	-4.6619
55310.4	55311.8	55311.5	55315.3	-4.823	-3.4032	-3.8018	-1.189	0.0138	-1.8248	-4.6555
55310.4	55311.9	55311.5	55315.3	-4.82	-3.4018	-3.8008	-1.186	0.0152	-1.8238	-4.6487
55310.4	55311.9	55311.5	55315.3	-4.8196	-3.4006	-3.8022	-1.1856	0.0164	-1.8252	-4.6425
55310.4	55311.9	55311.5	55315.3	-4.8222	-3.3994	-3.8028	-1.1882	0.0176	-1.8258	-4.6381
55310.5	55311.9	55311.5	55315.3	-4.8248	-3.4006	-3.8026	-1.1908	0.0164	-1.8256	-4.6321
55310.5	55311.9	55311.5	55315.3	-4.8238	-3.402	-3.8002	-1.1898	0.015	-1.8232	-4.6235
55310.5	55311.9	55311.5	55315.3	-4.8218	-3.403	-3.799	-1.1878	0.014	-1.822	-4.6141
55310.5	55311.9	55311.5	55315.3	-4.8202	-3.4024	-3.799	-1.1862	0.0146	-1.822	-4.6059
55310.5	55311.9	55311.5	55315.3	-4.82	-3.4004	-3.7986	-1.186	0.0166	-1.8216	-4.5993
55310.5	55311.9	55311.5	55315.3	-4.8202	-3.3994	-3.7982	-1.1862	0.0176	-1.8212	-4.5915
55310.5	55311.9	55311.5	55315.3	-4.8194	-3.3984	-3.798	-1.1854	0.0186	-1.821	-4.5823
55310.5	55311.9	55311.5	55315.3	-4.8174	-3.3974	-3.7974	-1.1834	0.0196	-1.8204	-4.5725
55310.5	55311.9	55311.5	55315.3	-4.8174	-3.3984	-3.7986	-1.1834	0.0186	-1.8216	-4.5635
55310.5	55311.9	55311.5	55315.3	-4.8186	-3.4006	-3.799	-1.1846	0.0164	-1.822	-4.5565
55310.5	55312	55311.6	55315.4	-4.8198	-3.402	-3.7984	-1.1858	0.015	-1.8214	-4.5503
55310.5	55312	55311.6	55315.4	-4.8202	-3.402	-3.7984	-1.1862	0.015	-1.8214	-4.5445
55310.5	55312	55311.6	55315.4	-4.8194	-3.4014	-3.7996	-1.1854	0.0156	-1.8226	-4.5381
55310.6	55312	55311.6	55315.4	-4.8182	-3.4026	-3.8004	-1.1842	0.0144	-1.8234	-4.5313
55310.6	55312	55311.6	55315.4	-4.8172	-3.4016	-3.799	-1.1832	0.0154	-1.822	-4.5271
55310.6	55312	55311.6	55315.4	-4.8162	-3.3986	-3.7952	-1.1822	0.0184	-1.8182	-4.5255
55310.6	55312	55311.6	55315.4	-4.818	-3.3984	-3.7952	-1.184	0.0186	-1.8182	-4.5245
55310.6	55312	55311.6	55315.4	-4.8212	-3.4	-3.7958	-1.1872	0.017	-1.8188	-4.5247
55310.6	55312	55311.6	55315.4	-4.8226	-3.4022	-3.7964	-1.1886	0.0148	-1.8194	-4.5239
55310.6	55312	55311.6	55315.4	-4.8216	-3.4026	-3.7966	-1.1876	0.0144	-1.8196	-4.5229
55310.6	55312	55311.6	55315.4	-4.8188	-3.402	-3.7978	-1.1848	0.015	-1.8208	-4.5211
55310.6	55312	55311.6	55315.4	-4.819	-3.4022	-3.8002	-1.185	0.0148	-1.8232	-4.5217
55310.6	55312	55311.6	55315.4	-4.8208	-3.4002	-3.7998	-1.1868	0.0168	-1.8228	-4.5259
55310.6	55312	55311.6	55315.4	-4.8214	-3.3976	-3.7968	-1.1874	0.0194	-1.8198	-4.5305
55310.6	55312	55311.6	55315.4	-4.8202	-3.398	-3.7962	-1.1862	0.019	-1.8192	-4.5325
55310.6	55312	55311.6	55315.4	-4.8202	-3.4006	-3.7976	-1.1862	0.0164	-1.8206	-4.5349
55310.5	55312	55311.6	55315.4	-4.8202	-3.4024	-3.8004	-1.1862	0.0146	-1.8234	-4.5381
55310.5	55312	55311.6	55315.4	-4.8202	-3.4018	-3.8018	-1.1862	0.0152	-1.8248	-4.5431
55310.5	55312	55311.6	55315.4	-4.82	-3.4008	-3.8014	-1.186	0.0162	-1.8244	-4.5477
55310.5	55312	55311.6	55315.4	-4.8196	-3.4004	-3.801	-1.1856	0.0166	-1.824	-4.5519
55310.5	55311.9	55311.5	55315.3	-4.8178	-3.3984	-3.8004	-1.1838	0.0186	-1.8234	-4.5567
55310.5	55311.9	55311.5	55315.3	-4.8164	-3.3976	-3.7998	-1.1824	0.0194	-1.8228	-4.5631
55310.5	55311.9	55311.5	55315.3	-4.8186	-3.3996	-3.7998	-1.1846	0.0174	-1.8228	-4.5729
55310.5	55311.9	55311.5	55315.3	-4.8222	-3.404	-3.8008	-1.1882	0.013	-1.8238	-4.5829
55310.5	55311.9	55311.5	55315.3	-4.8238	-3.4066	-3.8034	-1.1898	0.0104	-1.8264	-4.5913
55310.5	55311.9	55311.5	55315.3	-4.8226	-3.4052	-3.8052	-1.1886	0.0118	-1.8282	-4.6001
55310.5	55311.9	55311.5	55315.3	-4.8224	-3.4034	-3.804	-1.1884	0.0136	-1.827	-4.6113
55310.5	55311.9	55311.5	55315.3	-4.8232	-3.4034	-3.8012	-1.1892	0.0136	-1.8242	-4.6239
55310.5	55311.9	55311.5	55315.3	-4.8206	-3.4036	-3.7982	-1.1866	0.0134	-1.8212	-4.6343
55310.4	55311.9	55311.5	55315.3	-4.8186	-3.404	-3.7976	-1.1846	0.013	-1.8206	-4.6441
55310.4	55311.8	55311.4	55315.2	-4.8198	-3.4044	-3.8	-1.1858	0.0126	-1.823	-4.6563
55310.4	55311.8	55311.4	55315.2	-4.822	-3.4058	-3.8038	-1.188	0.0112	-1.8268	-4.6685
55310.4	55311.8	55311.4	55315.2	-4.8228	-3.4068	-3.8048	-1.1888	0.0102	-1.8278	-4.6793
55310.4	55311.8	55311.4	55315.2	-4.8226	-3.4086	-3.8048	-1.1886	0.0084	-1.8278	-4.6875
55310.4	55311.8	55311.4	55315.2	-4.8232	-3.4092	-3.8046	-1.1892	0.0078	-1.8276	-4.6943
55310.4	55311.8	55311.4	55315.2	-4.8246	-3.4074	-3.8046	-1.1906	0.0096	-1.8276	-4.6997
55310.4	55311.8	55311.4	55315.2	-4.8246	-3.4052	-3.806	-1.1906	0.0118	-1.829	-4.7023
55310.4	55311.8	55311.4	55315.2	-4.8252	-3.404	-3.8072	-1.1912	0.013	-1.8302	-4.7037
55310.4	55311.8	55311.4	55315.2	-4.8254	-3.4036	-3.8074	-1.1914	0.0134	-1.8304	-4.7037
55310.4	55311.8	55311.4	55315.2	-4.8232	-3.4058	-3.8066	-1.1892	0.0112	-1.8296	-4.7001
55310.4	55311.8	55311.4	55315.2	-4.82	-3.4076	-3.805	-1.186	0.0094	-1.828	-4.6957
55310.4	55311.8	55311.4	55315.2	-4.821	-3.4082	-3.8042	-1.187	0.0088	-1.8272	-4.6943
55310.4	55311.8	55311.4	55315.2	-4.8232	-3.4054	-3.8042	-1.1892	0.0116	-1.8272	-4.6941
55310.4	55311.8	55311.4	55315.2	-4.8236	-3.4014	-3.803	-1.1896	0.0156	-1.826	-4.6925
55310.4	55311.8	55311.4	55315.2	-4.824	-3.403	-3.8034	-1.19	0.014	-1.8264	-4.6883
55310.4	55311.8	55311.4	55315.2	-4.8242	-3.4068	-3.8042	-1.1902	0.0102	-1.8272	-4.6835
55310.4	55311.8	55311.4	55315.2	-4.8248	-3.408	-3.804	-1.1908	0.009	-1.827	-4.6803
55310.4	55311.8	55311.4	55315.2	-4.8236	-3.4056	-3.8012	-1.1896	0.0114	-1.8242	-4.6771
55310.4	55311.8	55311.4	55315.2	-4.8214	-3.4034	-3.7984	-1.1874	0.0136	-1.8214	-4.6731
55310.4	55311.8	55311.4	55315.2	-4.8216	-3.405	-3.8004	-1.1876	0.012	-1.8234	-4.6681
55310.4	55311.8	55311.4	55315.2	-4.8226	-3.4068	-3.8044	-1.1886	0.0102	-1.8274	-4.6605
55310.4	55311.9	55311.5	55315.3	-4.8226	-3.4058	-3.8058	-1.1886	0.0112	-1.8288	-4.6521
55310.4	55311.9	55311.5	55315.3	-4.8218	-3.4026	-3.8046	-1.1878	0.0144	-1.8276	-4.6435
55310.5	55311.9	55311.5	55315.3	-4.8216	-3.4008	-3.8034	-1.1876	0.0162	-1.8264	-4.6351
55310.5	55311.9	55311.5	55315.3	-4.8232	-3.4038	-3.8052	-1.1892	0.0132	-1.8282	-4.6257
55310.5	55311.9	55311.5	55315.3	-4.824	-3.4076	-3.8072	-1.19	0.0094	-1.8302	-4.6149
55310.5	55311.9	55311.5	55315.3	-4.8232	-3.4086	-3.8074	-1.1892	0.0084	-1.8304	-4.6033
55310.5	55311.9	55311.5	55315.3	-4.8228	-3.4066	-3.807	-1.1888	0.0104	-1.83	-4.5929
55310.5	55311.9	55311.5	55315.3	-4.8244	-3.4052	-3.8066	-1.1904	0.0118	-1.8296	-4.5829
55310.5	55311.9	55311.5	55315.3	-4.8264	-3.4064	-3.8048	-1.1924	0.0106	-1.8278	-4.5721
55310.5	55311.9	55311.5	55315.4	-4.8244	-3.4056	-3.8018	-1.1904	0.0114	-1.8248	-4.5585
55310.5	55312	55311.6	55315.4	-4.8206	-3.403	-3.8014	-1.1866	0.014	-1.8244	-4.5441
55310.6	55312	55311.6	55315.4	-4.8178	-3.4012	-3.8022	-1.1838	0.0158	-1.8252	-4.5311
55310.6	55312	55311.6	55315.4	-4.8184	-3.4012	-3.803	-1.1844	0.0158	-1.826	-4.5217
55310.6	55312	55311.6	55315.4	-4.8226	-3.4042	-3.8044	-1.1886	0.0128	-1.8274	-4.5149
55310.6	55312	55311.6	55315.4	-4.8254	-3.4066	-3.8056	-1.1914	0.0104	-1.8286	-4.5089
55310.6	55312	55311.6	55315.4	-4.824	-3.4058	-3.8056	-1.19	0.0112	-1.8286	-4.5029
55310.6	55312	55311.6	55315.4	-4.8194	-3.4044	-3.8034	-1.1854	0.0126	-1.8264	-4.4961
55310.6	55312	55311.6	55315.4	-4.8162	-3.4036	-3.8016	-1.1822	0.0134	-1.8246	-4.4899
55310.6	55312	55311.6	55315.4	-4.8196	-3.4056	-3.8038	-1.1856	0.0114	-1.8268	-4.4877
55310.6	55312	55311.6	55315.4	-4.8242	-3.4078	-3.8048	-1.1902	0.0092	-1.8278	-4.4877
55310.6	55312	55311.6	55315.4	-4.8262	-3.4076	-3.8046	-1.1922	0.0094	-1.8276	-4.4871
55310.6	55312	55311.6	55315.4	-4.8246	-3.4054	-3.803	-1.1906	0.0116	-1.826	-4.4833
55310.6	55312	55311.6	55315.4	-4.8248	-3.4044	-3.8036	-1.1908	0.0126	-1.8266	-4.4791
55310.6	55312	55311.6	55315.4	-4.8268	-3.406	-3.8066	-1.1928	0.011	-1.8296	-4.4757
55310.6	55312	55311.6	55315.4	-4.8274	-3.4088	-3.8084	-1.1934	0.0082	-1.8314	-4.4711
55310.6	55312	55311.6	55315.4	-4.8256	-3.4098	-3.8092	-1.1916	0.0072	-1.8322	-4.4631
55310.6	55312	55311.6	55315.5	-4.8254	-3.4084	-3.8098	-1.1914	0.0086	-1.8328	-4.4555
55310.6	55312.1	55311.7	55315.5	-4.8254	-3.4056	-3.8086	-1.1914	0.0114	-1.8316	-4.4497
55310.6	55312.1	55311.7	55315.5	-4.8266	-3.4042	-3.8088	-1.1926	0.0128	-1.8318	-4.4459
55310.6	55312.1	55311.7	55315.5	-4.8246	-3.4042	-3.8072	-1.1906	0.0128	-1.8302	-4.4393
55310.7	55312.1	55311.7	55315.5	-4.8204	-3.4044	-3.805	-1.1864	0.0126	-1.828	-4.4289
55310.7	55312.1	55311.7	55315.5	-4.8184	-3.4054	-3.8044	-1.1844	0.0116	-1.8274	-4.4181
55310.7	55312.1	55311.7	55315.5	-4.8196	-3.4068	-3.805	-1.1856	0.0102	-1.828	-4.4093
55310.7	55312.1	55311.7	55315.5	-4.8236	-3.4082	-3.8062	-1.1896	0.0088	-1.8292	-4.4031
55310.7	55312.1	55311.7	55315.5	-4.8256	-3.4072	-3.8056	-1.1916	0.0098	-1.8286	-4.3977
55310.7	55312.1	55311.7	55315.5	-4.8226	-3.4034	-3.8044	-1.1886	0.0136	-1.8274	-4.3905
55310.7	55312.1	55311.7	55315.5	-4.8186	-3.4016	-3.804	-1.1846	0.0154	-1.827	-4.3833
55310.7	55312.1	55311.7	55315.5	-4.8172	-3.4034	-3.8024	-1.1832	0.0136	-1.8254	-4.3785
55310.7	55312.1	55311.7	55315.5	-4.8168	-3.4048	-3.8	-1.1828	0.0122	-1.823	-4.3757
55310.7	55312.1	55311.7	55315.5	-4.816	-3.4042	-3.799	-1.182	0.0128	-1.822	-4.3735
55310.7	55312.1	55311.7	55315.5	-4.8152	-3.4038	-3.802	-1.1812	0.0132	-1.825	-4.3695
55310.7	55312.1	55311.7	55315.5	-4.8168	-3.406	-3.8054	-1.1828	0.011	-1.8284	-4.3665
55310.7	55312.1	55311.7	55315.5	-4.82	-3.4088	-3.8052	-1.186	0.0082	-1.8282	-4.3675
55310.7	55312.1	55311.7	55315.5	-4.8214	-3.4076	-3.802	-1.1874	0.0094	-1.825	-4.3703
55310.7	55312.1	55311.7	55315.5	-4.8182	-3.4028	-3.7984	-1.1842	0.0142	-1.8214	-4.3707
55310.7	55312.1	55311.7	55315.5	-4.814	-3.3996	-3.7976	-1.18	0.0174	-1.8206	-4.3685
55310.7	55312.1	55311.7	55315.5	-4.8122	-3.3976	-3.7976	-1.1782	0.0194	-1.8206	-4.3679
55310.7	55312.1	55311.7	55315.5	-4.8132	-3.3984	-3.7974	-1.1792	0.0186	-1.8204	-4.3695
55310.7	55312.1	55311.7	55315.5	-4.8146	-3.4012	-3.7986	-1.1806	0.0158	-1.8216	-4.3705
55310.7	55312.1	55311.7	55315.5	-4.8156	-3.4046	-3.8008	-1.1816	0.0124	-1.8238	-4.3705
55310.7	55312.1	55311.7	55315.5	-4.8164	-3.4056	-3.8026	-1.1824	0.0114	-1.8256	-4.3711
55310.7	55312.1	55311.7	55315.5	-4.817	-3.4032	-3.8016	-1.183	0.0138	-1.8246	-4.3733
55310.7	55312.1	55311.7	55315.5	-4.8178	-3.4002	-3.7976	-1.1838	0.0168	-1.8206	-4.3759
55310.7	55312.1	55311.7	55315.5	-4.8176	-3.4002	-3.7952	-1.1836	0.0168	-1.8182	-4.3751
55310.7	55312.1	55311.7	55315.5	-4.817	-3.402	-3.797	-1.183	0.015	-1.82	-4.3729
55310.7	55312.1	55311.7	55315.5	-4.8164	-3.4042	-3.8048	-1.1824	0.0128	-1.8278	-4.3709
55310.7	55312.1	55311.7	55315.5	-4.819	-3.4066	-3.8176	-1.185	0.0104	-1.8406	-4.3735
55310.7	55312.1	55311.7	55315.5	-4.8236	-3.4092	-3.8308	-1.1896	0.0078	-1.8538	-4.3811
55310.7	55312.1	55311.7	55315.5	-4.8282	-3.412	-3.8418	-1.1942	0.005	-1.8648	-4.3913
55310.7	55312.1	55311.7	55315.5	-4.831	-3.414	-3.851	-1.197	0.003	-1.874	-4.4009
55310.7	55312.1	55311.6	55315.5	-4.8324	-3.416	-3.8602	-1.1984	0.001	-1.8832	-4.4095
55310.7	55312.1	55311.6	55315.5	-4.8332	-3.4172	-3.869	-1.1992	-0.0002	-1.892	-4.4177
55310.7	55312.1	55311.6	55315.5	-4.8364	-3.4186	-3.8756	-1.2024	-0.0016	-1.8986	-4.4281
55310.6	55312.1	55311.6	55315.5	-4.8392	-3.4194	-3.8794	-1.2052	-0.0024	-1.9024	-4.4383
55310.6	55312.1	55311.6	55315.5	-4.8404	-3.42	-3.8814	-1.2064	-0.003	-1.9044	-4.4469
55310.6	55312.1	55311.6	55315.5	-4.8398	-3.4218	-3.8824	-1.2058	-0.0048	-1.9054	-4.4531
55310.6	55312	55311.6	55315.5	-4.8394	-3.424	-3.8808	-1.2054	-0.007	-1.9038	-4.4595
55310.6	55312	55311.6	55315.5	-4.84	-3.4242	-3.8788	-1.206	-0.0072	-1.9018	-4.4657
55310.6	55312	55311.6	55315.5	-4.84	-3.4212	-3.8784	-1.206	-0.0042	-1.9014	-4.4697
55310.6	55312	55311.6	55315.5	-4.8358	-3.417	-3.8784	-1.2018	-1.28075e-12	-1.9014	-4.4691
55310.6	55312	55311.6	55315.5	-4.8308	-3.4156	-3.8774	-1.1968	0.0014	-1.9004	-4.4661
55310.6	55312	55311.6	55315.5	-4.8284	-3.4164	-3.8744	-1.1944	0.0006	-1.8974	-4.4629
55310.6	55312	55311.6	55315.5	-4.8306	-3.417	-3.873	-1.1966	5.9952e-12	-1.896	-4.4609
55310.6	55312	55311.6	55315.5	-4.8348	-3.4178	-3.8744	-1.2008	-0.0008	-1.8974	-4.4585
55310.6	55312	55311.6	55315.5	-4.8368	-3.4196	-3.877	-1.2028	-0.0026	-1.9	-4.4537
55310.6	55312.1	55311.6	55315.5	-4.8344	-3.4214	-3.8774	-1.2004	-0.0044	-1.9004	-4.4455
55310.6	55312.1	55311.6	55315.5	-4.833	-3.4224	-3.8764	-1.199	-0.0054	-1.8994	-4.4369
55310.7	55312.1	55311.6	55315.5	-4.834	-3.4212	-3.875	-1.2	-0.0042	-1.898	-4.4291
55310.7	55312.1	55311.6	55315.5	-4.8364	-3.4192	-3.8762	-1.2024	-0.0022	-1.8992	-4.4219
55310.7	55312.1	55311.6	55315.5	-4.8356	-3.417	-3.877	-1.2016	-1.28075e-12	-1.9	-4.4121
55310.7	55312.1	55311.6	55315.5	-4.8326	-3.4156	-3.876	-1.1986	0.0014	-1.899	-4.4003
55310.7	55312.1	55311.7	55315.5	-4.8316	-3.4156	-3.8742	-1.1976	0.0014	-1.8972	-4.3891
55310.7	55312.1	55311.7	55315.5	-4.8344	-3.418	-3.8736	-1.2004	-0.001	-1.8966	-4.3799
55310.7	55312.1	55311.7	55315.6	-4.8352	-3.4202	-3.874	-1.2012	-0.0032	-1.897	-4.3687
55310.7	55312.1	55311.7	55315.6	-4.8324	-3.4216	-3.8754	-1.1984	-0.0046	-1.8984	-4.3537
55310.7	55312.2	55311.7	55315.6	-4.8288	-3.4206	-3.8746	-1.1948	-0.0036	-1.8976	-4.3381
55310.8	55312.2	55311.7	55315.6	-4.8288	-3.4186	-3.8734	-1.1948	-0.0016	-1.8964	-4.3243
55310.8	55312.2	55311.7	55315.6	-4.8314	-3.4162	-3.8714	-1.1974	0.0008	-1.8944	-4.3103
55310.8	55312.2	55311.8	55315.6	-4.8334	-3.4154	-3.87	-1.1994	0.0016	-1.893	-4.2923
55310.8	55312.2	55311.8	55315.7	-4.8326	-3.416	-3.8708	-1.1986	0.001	-1.8938	-4.2679
55310.8	55312.3	55311.8	55315.7	-4.8316	-3.4174	-3.8726	-1.1976	-0.0004	-1.8956	-4.2401
55310.9	55312.3	55311.8	55315.7	-4.8328	-3.4184	-3.8736	-1.1988	-0.0014	-1.8966	-4.2121
55310.9	55312.3	55311.9	55315.7	-4.8346	-3.42	-3.873	-1.2006	-0.003	-1.896	-4.1815
55310.9	55312.4	55311.9	55315.8	-4.835	-3.4192	-3.871	-1.201	-0.0022	-1.894	-4.1477
55311	55312.4	55311.9	55315.8	-4.8332	-3.4172	-3.8704	-1.1992	-0.0002	-1.8934	-4.1091
55311	55312.4	55312	55315.8	-4.8308	-3.4142	-3.8714	-1.1968	0.0028	-1.8944	-4.0679
55311.1	55312.5	55312	55315.9	-4.8308	-3.414	-3.8716	-1.1968	0.003	-1.8946	-4.0277
55311.1	55312.5	55312.1	55315.9	-4.831	-3.4178	-3.8714	-1.197	-0.0008	-1.8944	-3.9877
55311.1	55312.5	55312.1	55316	-4.8284	-3.4208	-3.8718	-1.1944	-0.0038	-1.8948	-3.9465
55311.2	55312.6	55312.1	55316	-4.8244	-3.419	-3.8714	-1.1904	-0.002	-1.8944	-3.9067
55311.2	55312.6	55312.2	55316	-4.8242	-3.415	-3.8702	-1.1902	0.002	-1.8932	-3.8723
55311.2	55312.7	55312.2	55316.1	-4.8284	-3.4122	-3.8696	-1.1944	0.0048	-1.8926	-3.8433
55311.3	55312.7	55312.2	55316.1	-4.8332	-3.4138	-3.8716	-1.1992	0.0032	-1.8946	-3.8163
55311.3	55312.7	55312.3	55316.1	-4.8338	-3.415	-3.8742	-1.1998	0.002	-1.8972	-3.7891
55311.3	55312.7	55312.3	55316.2	-4.8312	-3.4152	-3.873	-1.1972	0.0018	-1.896	-3.7635
55311.3	55312.8	55312.3	55316.2	-4.8288	-3.415	-3.8704	-1.1948	0.002	-1.8934	-3.7409
55311.4	55312.8	55312.3	55316.2	-4.8284	-3.4146	-3.8702	-1.1944	0.0024	-1.8932	-3.7207
55311.4	55312.8	55312.3	55316.2	-4.8288	-3.414	-3.872	-1.1948	0.003	-1.895	-3.7023
55311.4	55312.8	55312.4	55316.2	-4.8302	-3.4148	-3.8748	-1.1962	0.0022	-1.8978	-3.6853
55311.4	55312.8	55312.4	55316.2	-4.8302	-3.4164	-3.8752	-1.1962	0.0006	-1.8982	-3.6681
55311.4	55312.8	55312.4	55316.3	-4.8278	-3.4178	-3.8736	-1.1938	-0.0008	-1.8966	-3.6503
55311.5	55312.9	55312.4	55316.3	-4.8264	-3.4164	-3.8706	-1.1924	0.0006	-1.8936	-3.6347
55311.5	55312.9	55312.4	55316.3	-4.8282	-3.4124	-3.8678	-1.1942	0.0046	-1.8908	-3.6223
55311.5	55312.9	55312.4	55316.3	-4.8328	-3.411	-3.8696	-1.1988	0.006	-1.8926	-3.6097
55311.5	55312.9	55312.5	55316.3	-4.8364	-3.4126	-3.8738	-1.2024	0.0044	-1.8968	-3.5949
55311.5	55312.9	55312.5	55316.3	-4.8336	-3.413	-3.8738	-1.1996	0.004	-1.8968	-3.5769
55311.5	55312.9	55312.5	55316.4	-4.8282	-3.4112	-3.87	-1.1942	0.0058	-1.893	-3.5583
55311.5	55313	55312.5	55316.4	-4.8264	-3.4098	-3.866	-1.1924	0.0072	-1.889	-3.5413
55311.6	55313	55312.5	55316.4	-4.8282	-3.4112	-3.865	-1.1942	0.0058	-1.888	-3.5245
55311.6	55313	55312.5	55316.4	-4.8306	-3.413	-3.867	-1.1966	0.004	-1.89	-3.5073
55311.6	55313	55312.6	55316.4	-4.8292	-3.411	-3.8676	-1.1952	0.006	-1.8906	-3.4891
55311.6	55313	55312.6	55316.4	-4.827	-3.4088	-3.8666	-1.193	0.0082	-1.8896	-3.4711
55311.6	55313	55312.6	55316.5	-4.8276	-3.4098	-3.8666	-1.1936	0.0072	-1.8896	-3.4549
55311.6	55313.1	55312.6	55316.5	-4.8288	-3.4134	-3.8676	-1.1948	0.0036	-1.8906	-3.4389
55311.7	55313.1	55312.6	55316.5	-4.828	-3.4136	-3.8684	-1.194	0.0034	-1.8914	-3.4239
55311.7	55313.1	55312.6	55316.5	-4.8246	-3.41	-3.8672	-1.1906	0.007	-1.8902	-3.4097
55311.7	55313.1	55312.6	55316.5	-4.8218	-3.4058	-3.8646	-1.1878	0.0112	-1.8876	-3.3965
55311.7	55313.1	55312.7	55316.5	-4.8222	-3.4058	-3.8636	-1.1882	0.0112	-1.8866	-3.3837
55311.7	55313.1	55312.7	55316.5	-4.8262	-3.4094	-3.865	-1.1922	0.0076	-1.888	-3.3719
55311.7	55313.1	55312.7	55316.6	-4.8286	-3.4112	-3.8654	-1.1946	0.0058	-1.8884	-3.3615
55311.7	55313.2	55312.7	55316.6	-4.8268	-3.4084	-3.8628	-1.1928	0.0086	-1.8858	-3.3519
55311.7	55313.2	55312.7	55316.6	-4.8234	-3.4052	-3.8614	-1.1894	0.0118	-1.8844	-3.3411
55311.8	55313.2	55312.7	55316.6	-4.822	-3.405	-3.8626	-1.188	0.012	-1.8856	-3.3297
55311.8	55313.2	55312.7	55316.6	-4.824	-3.408	-3.8638	-1.19	0.009	-1.8868	-3.3195
55311.8	55313.2	55312.7	55316.6	-4.8282	-3.4122	-3.865	-1.1942	0.0048	-1.888	-3.3113
55311.8	55313.2	55312.7	55316.6	-4.828	-3.4126	-3.863	-1.194	0.0044	-1.886	-3.3035
55311.8	55313.2	55312.8	55316.6	-4.8246	-3.409	-3.8598	-1.1906	0.008	-1.8828	-3.2959
55311.8	55313.2	55312.8	55316.6	-4.8214	-3.4044	-3.8566	-1.1874	0.0126	-1.8796	-3.2887
55311.8	55313.2	55312.8	55316.6	-4.8216	-3.402	-3.8552	-1.1876	0.015	-1.8782	-3.2831
55311.8	55313.2	55312.8	55316.6	-4.824	-3.4042	-3.8586	-1.19	0.0128	-1.8816	-3.2771
55311.8	55313.2	55312.8	55316.6	-4.8236	-3.4078	-3.8626	-1.1896	0.0092	-1.8856	-3.2689
55311.8	55313.2	55312.8	55316.6	-4.8224	-3.4086	-3.8626	-1.1884	0.0084	-1.8856	-3.2623
55311.8	55313.2	55312.8	55316.7	-4.824	-3.4084	-3.861	-1.19	0.0086	-1.884	-3.2577
55311.8	55313.3	55312.8	55316.7	-4.8276	-3.4076	-3.86	-1.1936	0.0094	-1.883	-3.2541
55311.8	55313.3	55312.8	55316.7	-4.8286	-3.4076	-3.861	-1.1946	0.0094	-1.884	-3.2483
55311.8	55313.3	55312.8	55316.7	-4.8258	-3.4086	-3.8614	-1.1918	0.0084	-1.8844	-3.2399
55311.9	55313.3	55312.8	55316.7	-4.8226	-3.408	-3.8596	-1.1886	0.009	-1.8826	-3.2323
55311.9	55313.3	55312.8	55316.7	-4.8228	-3.4076	-3.8582	-1.1888	0.0094	-1.8812	-3.2265
55311.9	55313.3	55312.8	55316.7	-4.8256	-3.4086	-3.859	-1.1916	0.0084	-1.882	-3.2215
55311.9	55313.3	55312.8	55316.7	-4.829	-3.4104	-3.8602	-1.195	0.0066	-1.8832	-3.2175
55311.9	55313.3	55312.8	55316.7	-4.829	-3.4114	-3.8596	-1.195	0.0056	-1.8826	-3.2117
55311.9	55313.3	55312.8	55316.7	-4.8254	-3.4098	-3.8576	-1.1914	0.0072	-1.8806	-3.2039
55311.9	55313.3	55312.9	55316.7	-4.8202	-3.4064	-3.854	-1.1862	0.0106	-1.877	-3.1959
55311.9	55313.3	55312.9	55316.7	-4.8168	-3.4032	-3.8518	-1.1828	0.0138	-1.8748	-3.1893
55311.9	55313.3	55312.9	55316.7	-4.818	-3.402	-3.8536	-1.184	0.015	-1.8766	-3.1863
55311.9	55313.3	55312.9	55316.7	-4.8222	-3.4048	-3.857	-1.1882	0.0122	-1.88	-3.1857
55311.9	55313.3	55312.9	55316.7	-4.826	-3.4096	-3.86	-1.192	0.0074	-1.883	-3.1855
55311.9	55313.3	55312.9	55316.7	-4.8268	-3.4098	-3.8594	-1.1928	0.0072	-1.8824	-3.1863
55311.9	55313.3	55312.9	55316.7	-4.8246	-3.4062	-3.8568	-1.1906	0.0108	-1.8798	-3.1869
55311.9	55313.3	55312.9	55316.7	-4.8228	-3.405	-3.8562	-1.1888	0.012	-1.8792	-3.1883
55311.9	55313.3	55312.9	55316.7	-4.822	-3.406	-3.8564	-1.188	0.011	-1.8794	-3.1915
55311.9	55313.3	55312.9	55316.7	-4.8224	-3.4084	-3.8584	-1.1884	0.0086	-1.8814	-3.1957
55311.9	55313.3	55312.8	55316.7	-4.8234	-3.4094	-3.8598	-1.1894	0.0076	-1.8828	-3.2001
55311.9	55313.3	55312.8	55316.7	-4.8248	-3.4088	-3.8604	-1.1908	0.0082	-1.8834	-3.2043
55311.9	55313.3	55312.8	55316.7	-4.8268	-3.4084	-3.86	-1.1928	0.0086	-1.883	-3.2089
55311.9	55313.3	55312.8	55316.7	-4.8264	-3.4076	-3.86	-1.1924	0.0094	-1.883	-3.2125
55311.9	55313.3	55312.8	55316.7	-4.8234	-3.405	-3.8596	-1.1894	0.012	-1.8826	-3.2147
55311.9	55313.3	55312.8	55316.7	-4.8212	-3.4048	-3.8576	-1.1872	0.0122	-1.8806	-3.2167
55311.9	55313.3	55312.8	55316.7	-4.8208	-3.4056	-3.8544	-1.1868	0.0114	-1.8774	-3.2189
55311.9	55313.3	55312.8	55316.7	-4.8224	-3.4056	-3.8536	-1.1884	0.0114	-1.8766	-3.2213
55311.9	55313.3	55312.8	55316.7	-4.8228	-3.4042	-3.855	-1.1888	0.0128	-1.878	-3.2211
55311.9	55313.3	55312.8	55316.7	-4.8212	-3.4036	-3.857	-1.1872	0.0134	-1.88	-3.2167
55311.9	55313.3	55312.8	55316.7	-4.8196	-3.4036	-3.8558	-1.1856	0.0134	-1.8788	-3.2113
55311.9	55313.3	55312.8	55316.7	-4.8204	-3.4046	-3.8534	-1.1864	0.0124	-1.8764	-3.2069
55311.9	55313.3	55312.9	55316.7	-4.8232	-3.4052	-3.853	-1.1892	0.0118	-1.876	-3.2033
55311.9	55313.3	55312.9	55316.7	-4.827	-3.4058	-3.8544	-1.193	0.0112	-1.8774	-3.1997
55311.9	55313.3	55312.9	55316.7	-4.829	-3.4074	-3.8574	-1.195	0.0096	-1.8804	-3.1931
55311.9	55313.3	55312.9	55316.7	-4.827	-3.4074	-3.8576	-1.193	0.0096	-1.8806	-3.1831
55311.9	55313.3	55312.9	55316.7	-4.8222	-3.406	-3.8548	-1.1882	0.011	-1.8778	-3.1705
55311.9	55313.3	55312.9	55316.7	-4.8186	-3.4062	-3.8528	-1.1846	0.0108	-1.8758	-3.1583
55311.9	55313.3	55312.9	55316.8	-4.8188	-3.4062	-3.852	-1.1848	0.0108	-1.875	-3.1491
55311.9	55313.4	55312.9	55316.8	-4.8234	-3.4064	-3.8522	-1.1894	0.0106	-1.8752	-3.1423
55312	55313.4	55312.9	55316.8	-4.8264	-3.4074	-3.853	-1.1924	0.0096	-1.876	-3.1333
55312	55313.4	55312.9	55316.8	-4.8262	-3.4076	-3.852	-1.1922	0.0094	-1.875	-3.1223
55312	55313.4	55312.9	55316.8	-4.8254	-3.4068	-3.8522	-1.1914	0.0102	-1.8752	-3.1117
55312	55313.4	55313	55316.8	-4.824	-3.4042	-3.8532	-1.19	0.0128	-1.8762	-3.1023
55312	55313.4	55313	55316.8	-4.823	-3.4014	-3.8538	-1.189	0.0156	-1.8768	-3.0935
55312	55313.4	55313	55316.8	-4.8216	-3.4014	-3.8528	-1.1876	0.0156	-1.8758	-3.0835
55312	55313.4	55313	55316.8	-4.8208	-3.404	-3.8512	-1.1868	0.013	-1.8742	-3.0733
55312	55313.4	55313	55316.8	-4.8222	-3.4078	-3.8514	-1.1882	0.0092	-1.8744	-3.0641
55312	55313.4	55313	55316.9	-4.8232	-3.4092	-3.8528	-1.1892	0.0078	-1.8758	-3.0561
55312	55313.5	55313	55316.9	-4.8218	-3.406	-3.8528	-1.1878	0.011	-1.8758	-3.0481
55312	55313.5	55313	55316.9	-4.8204	-3.402	-3.85	-1.1864	0.015	-1.873	-3.0393
55312.1	55313.5	55313	55316.9	-4.8194	-3.4014	-3.8478	-1.1854	0.0156	-1.8708	-3.0269
55312.1	55313.5	55313	55316.9	-4.82	-3.4036	-3.8486	-1.186	0.0134	-1.8716	-3.0123
55312.1	55313.5	55313.1	55316.9	-4.8232	-3.4068	-3.8532	-1.1892	0.0102	-1.8762	-2.9975
55312.1	55313.5	55313.1	55316.9	-4.8268	-3.4082	-3.8574	-1.1928	0.0088	-1.8804	-2.9845
55312.1	55313.5	55313.1	55316.9	-4.8282	-3.4088	-3.8584	-1.1942	0.0082	-1.8814	-2.9707
55312.1	55313.5	55313.1	55317	-4.8272	-3.408	-3.856	-1.1932	0.009	-1.879	-2.9567
55312.1	55313.6	55313.1	55317	-4.8244	-3.4058	-3.8528	-1.1904	0.0112	-1.8758	-2.9431
55312.2	55313.6	55313.1	55317	-4.8244	-3.4058	-3.8514	-1.1904	0.0112	-1.8744	-2.9325
55312.2	55313.6	55313.1	55317	-4.826	-3.4082	-3.851	-1.192	0.0088	-1.874	-2.9237
55312.2	55313.6	55313.1	55317	-4.8262	-3.4086	-3.849	-1.1922	0.0084	-1.872	-2.9163
55312.2	55313.6	55313.2	55317	-4.8248	-3.4052	-3.8476	-1.1908	0.0118	-1.8706	-2.9097
55312.2	55313.6	55313.2	55317	-4.8252	-3.4036	-3.8492	-1.1912	0.0134	-1.8722	-2.9059
55312.2	55313.6	55313.2	55317	-4.8286	-3.4078	-3.8548	-1.1946	0.0092	-1.8778	-2.9037
55312.2	55313.6	55313.2	55317	-4.8296	-3.4122	-3.8592	-1.1956	0.0048	-1.8822	-2.9005
55312.2	55313.6	55313.2	55317	-4.8262	-3.4114	-3.8576	-1.1922	0.0056	-1.8806	-2.8971
55312.2	55313.6	55313.2	55317	-4.8228	-3.4078	-3.8534	-1.1888	0.0092	-1.8764	-2.8955
55312.2	55313.6	55313.2	55317	-4.8246	-3.4076	-3.8534	-1.1906	0.0094	-1.8764	-2.8955
55312.2	55313.6	55313.2	55317	-4.8288	-3.4098	-3.8568	-1.1948	0.0072	-1.8798	-2.8961
55312.2	55313.6	55313.2	55317	-4.8302	-3.41	-3.86	-1.1962	0.007	-1.883	-2.8947
55312.2	55313.6	55313.2	55317	-4.8288	-3.4086	-3.8596	-1.1948	0.0084	-1.8826	-2.8911
55312.2	55313.6	55313.2	55317	-4.827	-3.4074	-3.857	-1.193	0.0096	-1.88	-2.8867
55312.2	55313.6	55313.2	55317	-4.8256	-3.407	-3.8554	-1.1916	0.01	-1.8784	-2.8811
55312.2	55313.6	55313.2	55317	-4.8244	-3.4056	-3.855	-1.1904	0.0114	-1.878	-2.8745
55312.2	55313.6	55313.2	55317	-4.8228	-3.4046	-3.8532	-1.1888	0.0124	-1.8762	-2.8673
55312.2	55313.6	55313.2	55317	-4.8234	-3.407	-3.8516	-1.1894	0.01	-1.8746	-2.8597
55312.2	55313.6	55313.2	55317.1	-4.8256	-3.4102	-3.8518	-1.1916	0.0068	-1.8748	-2.8529
55312.2	55313.7	55313.2	55317.1	-4.827	-3.4116	-3.8548	-1.193	0.0054	-1.8778	-2.8457
55312.2	55313.7	55313.2	55317.1	-4.8276	-3.4106	-3.859	-1.1936	0.0064	-1.882	-2.8381
55312.3	55313.7	55313.2	55317.1	-4.8272	-3.4066	-3.8598	-1.1932	0.0104	-1.8828	-2.8321
55312.3	55313.7	55313.2	55317.1	-4.8274	-3.404	-3.8576	-1.1934	0.013	-1.8806	-2.8293
55312.3	55313.7	55313.2	55317.1	-4.8282	-3.4046	-3.856	-1.1942	0.0124	-1.879	-2.8281
55312.3	55313.7	55313.2	55317.1	-4.8276	-3.407	-3.8566	-1.1936	0.01	-1.8796	-2.8267
55312.3	55313.7	55313.2	55317.1	-4.8272	-3.4094	-3.8604	-1.1932	0.0076	-1.8834	-2.8263
55312.3	55313.7	55313.2	55317.1	-4.828	-3.4106	-3.8648	-1.194	0.0064	-1.8878	-2.8291
55312.3	55313.7	55313.2	55317.1	-4.8284	-3.4094	-3.8646	-1.1944	0.0076	-1.8876	-2.8351
55312.2	55313.7	55313.2	55317.1	-4.8272	-3.4078	-3.8596	-1.1932	0.0092	-1.8826	-2.8425
55312.2	55313.7	55313.2	55317.1	-4.8266	-3.4076	-3.8564	-1.1926	0.0094	-1.8794	-2.8515
55312.2	55313.6	55313.2	55317	-4.8282	-3.4078	-3.8584	-1.1942	0.0092	-1.8814	-2.8639
55312.2	55313.6	55313.2	55317	-4.831	-3.4092	-3.863	-1.197	0.0078	-1.886	-2.8781
55312.2	55313.6	55313.2	55317	-4.8312	-3.4094	-3.8632	-1.1972	0.0076	-1.8862	-2.8911
55312.2	55313.6	55313.2	55317	-4.8288	-3.4082	-3.86	-1.1948	0.0088	-1.883	-2.9015
55312.2	55313.6	55313.1	55317	-4.8268	-3.4076	-3.858	-1.1928	0.0094	-1.881	-2.9103
55312.2	55313.6	55313.1	55317	-4.8276	-3.4082	-3.8596	-1.1936	0.0088	-1.8826	-2.9197
55312.2	55313.6	55313.1	55317	-4.8294	-3.4088	-3.8612	-1.1954	0.0082	-1.8842	-2.9299
55312.1	55313.6	55313.1	55317	-4.8298	-3.4098	-3.8616	-1.1958	0.0072	-1.8846	-2.9381
55312.1	55313.6	55313.1	55317	-4.8288	-3.4106	-3.8606	-1.1948	0.0064	-1.8836	-2.9435
55312.1	55313.6	55313.1	55317	-4.8274	-3.4114	-3.8608	-1.1934	0.0056	-1.8838	-2.9461
55312.1	55313.6	55313.1	55317	-4.8272	-3.4108	-3.8608	-1.1932	0.0062	-1.8838	-2.9489
55312.1	55313.6	55313.1	55317	-4.829	-3.4092	-3.8604	-1.195	0.0078	-1.8834	-2.9539
55312.1	55313.5	55313.1	55317	-4.8328	-3.4098	-3.8614	-1.1988	0.0072	-1.8844	-2.9589
55312.1	55313.5	55313.1	55317	-4.8348	-3.413	-3.8628	-1.2008	0.004	-1.8858	-2.9599
55312.1	55313.5	55313.1	55317	-4.833	-3.4156	-3.8636	-1.199	0.0014	-1.8866	-2.9569
55312.1	55313.5	55313.1	55317	-4.8282	-3.4142	-3.8622	-1.1942	0.0028	-1.8852	-2.9535
55312.1	55313.5	55313.1	55317	-4.825	-3.412	-3.8612	-1.191	0.005	-1.8842	-2.9519
55312.1	55313.5	55313.1	55317	-4.8276	-3.4122	-3.8636	-1.1936	0.0048	-1.8866	-2.9529
55312.1	55313.5	55313.1	55317	-4.8322	-3.4134	-3.866	-1.1982	0.0036	-1.889	-2.9547
55312.1	55313.6	55313.1	55317	-4.8326	-3.4128	-3.8642	-1.1986	0.0042	-1.8872	-2.9551
55312.1	55313.6	55313.1	55317	-4.8286	-3.4098	-3.8596	-1.1946	0.0072	-1.8826	-2.9539
55312.1	55313.6	55313.1	55317	-4.8234	-3.4074	-3.8556	-1.1894	0.0096	-1.8786	-2.9509
55312.1	55313.6	55313.1	55317	-4.822	-3.4084	-3.8572	-1.188	0.0086	-1.8802	-2.9473
55312.1	55313.6	55313.1	55317	-4.8264	-3.412	-3.8624	-1.1924	0.005	-1.8854	-2.9469
55312.1	55313.6	55313.1	55317	-4.8308	-3.4144	-3.8666	-1.1968	0.0026	-1.8896	-2.9477
55312.1	55313.6	55313.1	55317	-4.8338	-3.4158	-3.8692	-1.1998	0.0012	-1.8922	-2.9471
55312.1	55313.6	55313.1	55317	-4.8338	-3.4152	-3.8688	-1.1998	0.0018	-1.8918	-2.9447
55312.1	55313.6	55313.1	55317	-4.8322	-3.4134	-3.8672	-1.1982	0.0036	-1.8902	-2.9419
55312.1	55313.6	55313.1	55317	-4.8316	-3.4128	-3.8674	-1.1976	0.0042	-1.8904	-2.9401
55312.1	55313.6	55313.1	55317	-4.832	-3.413	-3.8684	-1.198	0.004	-1.8914	-2.9389
55312.1	55313.6	55313.1	55317	-4.832	-3.4136	-3.8694	-1.198	0.0034	-1.8924	-2.9361
55312.2	55313.6	55313.1	55317	-4.8318	-3.4144	-3.867	-1.1978	0.0026	-1.89	-2.9329
55312.2	55313.6	55313.1	55317	-4.8294	-3.4132	-3.8628	-1.1954	0.0038	-1.8858	-2.9295
55312.2	55313.6	55313.1	55317	-4.8278	-3.4132	-3.861	-1.1938	0.0038	-1.884	-2.9265
55312.2	55313.6	55313.1	55317	-4.8266	-3.4154	-3.8626	-1.1926	0.0016	-1.8856	-2.9229
55312.2	55313.6	55313.1	55317	-4.8264	-3.4172	-3.864	-1.1924	-0.0002	-1.887	-2.9199
55312.2	55313.6	55313.1	55317	-4.8276	-3.417	-3.8636	-1.1936	-1.28075e-12	-1.8866	-2.9191
55312.2	55313.6	55313.1	55317	-4.8308	-3.4158	-3.8632	-1.1968	0.0012	-1.8862	-2.9203
55312.2	55313.6	55313.1	55317	-4.833	-3.4148	-3.8654	-1.199	0.0022	-1.8884	-2.9197
55312.2	55313.6	55313.1	55317	-4.8336	-3.4144	-3.8684	-1.1996	0.0026	-1.8914	-2.9167
55312.2	55313.6	55313.1	55317	-4.8326	-3.4148	-3.87	-1.1986	0.0022	-1.893	-2.9125
55312.2	55313.6	55313.1	55317	-4.8324	-3.416	-3.8698	-1.1984	0.001	-1.8928	-2.9105
55312.2	55313.6	55313.1	55317	-4.8346	-3.4176	-3.8678	-1.2006	-0.0006	-1.8908	-2.9127
55312.2	55313.6	55313.1	55317	-4.8344	-3.4162	-3.8644	-1.2004	0.0008	-1.8874	-2.9143
55312.2	55313.6	55313.1	55317	-4.8326	-3.413	-3.863	-1.1986	0.004	-1.886	-2.9135
55312.2	55313.6	55313.1	55317	-4.8314	-3.4128	-3.866	-1.1974	0.0042	-1.889	-2.9105
55312.2	55313.6	55313.1	55317	-4.8328	-3.4168	-3.8708	-1.1988	0.0002	-1.8938	-2.9079
55312.2	55313.6	55313.1	55317	-4.834	-3.4192	-3.8726	-1.2	-0.0022	-1.8956	-2.9069
55312.2	55313.6	55313.1	55317	-4.83	-3.4154	-3.869	-1.196	0.0016	-1.892	-2.9051
55312.2	55313.6	55313.1	55317	-4.8244	-3.4088	-3.8644	-1.1904	0.0082	-1.8874	-2.9029
55312.2	55313.6	55313.1	55317	-4.8254	-3.4086	-3.8646	-1.1914	0.0084	-1.8876	-2.9023
55312.2	55313.6	55313.1	55317	-4.8326	-3.4156	-3.87	-1.1986	0.0014	-1.893	-2.9035
55312.2	55313.6	55313.1	55317	-4.8406	-3.4224	-3.8754	-1.2066	-0.0054	-1.8984	-2.9065
55312.2	55313.6	55313.1	55317	-4.8408	-3.4224	-3.8758	-1.2068	-0.0054	-1.8988	-2.9073
55312.2	55313.6	55313.1	55317	-4.8354	-3.4178	-3.8718	-1.2014	-0.0008	-1.8948	-2.9055
55312.2	55313.6	55313.1	55317	-4.8302	-3.4136	-3.8694	-1.1962	0.0034	-1.8924	-2.9015
55312.2	55313.6	55313.1	55317	-4.8302	-3.4142	-3.8704	-1.1962	0.0028	-1.8934	-2.8989
55312.2	55313.6	55313.1	55317	-4.8334	-3.417	-3.8714	-1.1994	-1.28075e-12	-1.8944	-2.8999
55312.2	55313.6	55313.1	55317	-4.8338	-3.418	-3.87	-1.1998	-0.001	-1.893	-2.9007
55312.2	55313.6	55313.1	55317	-4.8324	-3.4184	-3.869	-1.1984	-0.0014	-1.892	-2.8995
55312.2	55313.6	55313.1	55317	-4.8332	-3.4196	-3.8718	-1.1992	-0.0026	-1.8948	-2.8979
55312.2	55313.6	55313.1	55317	-4.8346	-3.4202	-3.875	-1.2006	-0.0032	-1.898	-2.8965
55312.2	55313.6	55313.2	55317	-4.8342	-3.419	-3.874	-1.2002	-0.002	-1.897	-2.8957
55312.2	55313.6	55313.2	55317	-4.833	-3.4178	-3.8716	-1.199	-0.0008	-1.8946	-2.8949
55312.2	55313.6	55313.2	55317	-4.8336	-3.418	-3.8694	-1.1996	-0.001	-1.8924	-2.8949
55312.2	55313.6	55313.2	55317	-4.8338	-3.4174	-3.869	-1.1998	-0.0004	-1.892	-2.8949
55312.2	55313.6	55313.2	55317	-4.834	-3.4172	-3.8708	-1.2	-0.0002	-1.8938	-2.8943
55312.2	55313.6	55313.2	55317	-4.8326	-3.417	-3.8718	-1.1986	-1.28075e-12	-1.8948	-2.8919
55312.2	55313.6	55313.2	55317	-4.832	-3.4186	-3.8734	-1.198	-0.0016	-1.8964	-2.8895
55312.2	55313.6	55313.2	55317	-4.8338	-3.4202	-3.8746	-1.1998	-0.0032	-1.8976	-2.8893
55312.2	55313.6	55313.2	55317	-4.8364	-3.4188	-3.8738	-1.2024	-0.0018	-1.8968	-2.8913
55312.2	55313.6	55313.2	55317	-4.8368	-3.4158	-3.8714	-1.2028	0.0012	-1.8944	-2.8923
55312.2	55313.6	55313.2	55317	-4.8358	-3.4158	-3.8688	-1.2018	0.0012	-1.8918	-2.8907
55312.2	55313.6	55313.2	55317	-4.8344	-3.4172	-3.8692	-1.2004	-0.0002	-1.8922	-2.8877
55312.2	55313.6	55313.2	55317	-4.8348	-3.4188	-3.8722	-1.2008	-0.0018	-1.8952	-2.8863
55312.2	55313.6	55313.2	55317	-4.8364	-3.4178	-3.873	-1.2024	-0.0008	-1.896	-2.8873
55312.2	55313.6	55313.2	55317	-4.834	-3.4134	-3.87	-1.2	0.0036	-1.893	-2.8869
55312.2	55313.6	55313.2	55317	-4.8312	-3.4114	-3.867	-1.1972	0.0056	-1.89	-2.8851
55312.2	55313.6	55313.2	55317	-4.832	-3.4144	-3.8688	-1.198	0.0026	-1.8918	-2.8837
55312.2	55313.6	55313.2	55317	-4.8346	-3.4186	-3.8718	-1.2006	-0.0016	-1.8948	-2.8833
55312.2	55313.6	55313.2	55317	-4.837	-3.4194	-3.8734	-1.203	-0.0024	-1.8964	-2.8837
55312.2	55313.6	55313.2	55317	-4.8374	-3.4164	-3.873	-1.2034	0.0006	-1.896	-2.8837
55312.2	55313.6	55313.2	55317	-4.836	-3.4128	-3.8712	-1.202	0.0042	-1.8942	-2.8825
55312.2	55313.6	55313.2	55317	-4.8358	-3.4144	-3.8698	-1.2018	0.0026	-1.8928	-2.8805
55312.2	55313.6	55313.2	55317	-4.8376	-3.4188	-3.8712	-1.2036	-0.0018	-1.8942	-2.8783
55312.2	55313.6	55313.2	55317	-4.8388	-3.4212	-3.8742	-1.2048	-0.0042	-1.8972	-2.8763
55312.2	55313.6	55313.2	55317	-4.836	-3.4188	-3.8768	-1.202	-0.0018	-1.8998	-2.8737
55312.2	55313.6	55313.2	55317	-4.8324	-3.4162	-3.876	-1.1984	0.0008	-1.899	-2.8717
55312.2	55313.6	55313.2	55317	-4.8308	-3.4156	-3.8718	-1.1968	0.0014	-1.8948	-2.8713
55312.2	55313.6	55313.2	55317	-4.8334	-3.4168	-3.8684	-1.1994	0.0002	-1.8914	-2.8729
55312.2	55313.6	55313.2	55317	-4.8368	-3.416	-3.8676	-1.2028	0.001	-1.8906	-2.8747
55312.2	55313.6	55313.2	55317	-4.8364	-3.4144	-3.8688	-1.2024	0.0026	-1.8918	-2.8741
55312.2	55313.6	55313.2	55317	-4.8334	-3.4138	-3.8706	-1.1994	0.0032	-1.8936	-2.8723
55312.2	55313.6	55313.2	55317	-4.8304	-3.4152	-3.8702	-1.1964	0.0018	-1.8932	-2.8713
55312.2	55313.6	55313.2	55317	-4.8284	-3.4158	-3.8686	-1.1944	0.0012	-1.8916	-2.8713
55312.2	55313.6	55313.2	55317	-4.8302	-3.415	-3.8674	-1.1962	0.002	-1.8904	-2.8731
55312.2	55313.6	55313.2	55317	-4.8332	-3.4136	-3.8676	-1.1992	0.0034	-1.8906	-2.8755
55312.2	55313.6	55313.2	55317	-4.8352	-3.4132	-3.8696	-1.2012	0.0038	-1.8926	-2.8777
55312.2	55313.6	55313.2	55317	-4.836	-3.4146	-3.8714	-1.202	0.0024	-1.8944	-2.8795
55312.2	55313.6	55313.2	55317	-4.8362	-3.4172	-3.8732	-1.2022	-0.0002	-1.8962	-2.8809
55312.2	55313.6	55313.2	55317	-4.8338	-3.4174	-3.873	-1.1998	-0.0004	-1.896	-2.8811
55312.2	55313.6	55313.2	55317	-4.8306	-3.4134	-3.8702	-1.1966	0.0036	-1.8932	-2.8819
55312.2	55313.6	55313.2	55317	-4.8284	-3.4092	-3.8672	-1.1944	0.0078	-1.8902	-2.8841
55312.2	55313.6	55313.2	55317	-4.8288	-3.4088	-3.8662	-1.1948	0.0082	-1.8892	-2.8867
55312.2	55313.6	55313.2	55317	-4.834	-3.4138	-3.8692	-1.2	0.0032	-1.8922	-2.8903
55312.2	55313.6	55313.2	55317	-4.8398	-3.4188	-3.8732	-1.2058	-0.0018	-1.8962	-2.8935
55312.2	55313.6	55313.2	55317	-4.8412	-3.4192	-3.874	-1.2072	-0.0022	-1.897	-2.8941
55312.2	55313.6	55313.2	55317	-4.8372	-3.4156	-3.8712	-1.2032	0.0014	-1.8942	-2.8933
55312.2	55313.6	55313.2	55317	-4.8308	-3.412	-3.8674	-1.1968	0.005	-1.8904	-2.8925
55312.2	55313.6	55313.2	55317	-4.83	-3.4124	-3.8664	-1.196	0.0046	-1.8894	-2.8947
55312.2	55313.6	55313.2	55317	-4.8346	-3.4148	-3.868	-1.2006	0.0022	-1.891	-2.8983
55312.2	55313.6	55313.2	55317	-4.8382	-3.4158	-3.869	-1.2042	0.0012	-1.892	-2.8987
55312.2	55313.6	55313.2	55317	-4.8376	-3.4154	-3.8696	-1.2036	0.0016	-1.8926	-2.8953
55312.2	55313.6	55313.2	55317	-4.8348	-3.4142	-3.8704	-1.2008	0.0028	-1.8934	-2.8907
55312.2	55313.6	55313.2	55317	-4.835	-3.4138	-3.8724	-1.201	0.0032	-1.8954	-2.8881
55312.2	55313.6	55313.2	55317	-4.8354	-3.4146	-3.8732	-1.2014	0.0024	-1.8962	-2.8857
55312.2	55313.6	55313.2	55317	-4.8328	-3.4156	-3.8732	-1.1988	0.0014	-1.8962	-2.8803
55312.2	55313.6	55313.2	55317	-4.83	-3.416	-3.8726	-1.196	0.001	-1.8956	-2.8739
55312.2	55313.6	55313.2	55317	-4.8312	-3.416	-3.8724	-1.1972	0.001	-1.8954	-2.8705
55312.2	55313.6	55313.2	55317.1	-4.836	-3.4158	-3.8724	-1.202	0.0012	-1.8954	-2.8699
55312.2	55313.6	55313.2	55317.1	-4.8402	-3.4166	-3.8724	-1.2062	0.0004	-1.8954	-2.8679
55312.2	55313.6	55313.2	55317.1	-4.8378	-3.4148	-3.8712	-1.2038	0.0022	-1.8942	-2.8603
55312.2	55313.7	55313.2	55317.1	-4.8342	-3.4138	-3.871	-1.2002	0.0032	-1.894	-2.8501
55312.2	55313.7	55313.2	55317.1	-4.8326	-3.4152	-3.8712	-1.1986	0.0018	-1.8942	-2.8409
55312.2	55313.7	55313.2	55317.1	-4.8352	-3.4178	-3.8718	-1.2012	-0.0008	-1.8948	-2.8355
55312.3	55313.7	55313.2	55317.1	-4.8394	-3.4194	-3.8722	-1.2054	-0.0024	-1.8952	-2.8319
55312.3	55313.7	55313.2	55317.1	-4.8388	-3.4166	-3.8716	-1.2048	0.0004	-1.8946	-2.8263
55312.3	55313.7	55313.2	55317.1	-4.8342	-3.4124	-3.8698	-1.2002	0.0046	-1.8928	-2.8189
55312.3	55313.7	55313.2	55317.1	-4.832	-3.412	-3.8682	-1.198	0.005	-1.8912	-2.8115
55312.3	55313.7	55313.2	55317.1	-4.8342	-3.4154	-3.8688	-1.2002	0.0016	-1.8918	-2.8063
55312.3	55313.7	55313.2	55317.1	-4.8388	-3.4188	-3.8722	-1.2048	-0.0018	-1.8952	-2.8043
55312.3	55313.7	55313.2	55317.1	-4.8404	-3.421	-3.8756	-1.2064	-0.004	-1.8986	-2.8025
55312.3	55313.7	55313.2	55317.1	-4.8398	-3.4198	-3.8754	-1.2058	-0.0028	-1.8984	-2.8019
55312.3	55313.7	55313.3	55317.1	-4.8372	-3.4168	-3.8716	-1.2032	0.0002	-1.8946	-2.8009
55312.3	55313.7	55313.3	55317.1	-4.8352	-3.4138	-3.8702	-1.2012	0.0032	-1.8932	-2.8001
55312.3	55313.7	55313.2	55317.1	-4.8332	-3.412	-3.8706	-1.1992	0.005	-1.8936	-2.8009
55312.3	55313.7	55313.2	55317.1	-4.8318	-3.4122	-3.8708	-1.1978	0.0048	-1.8938	-2.8033
55312.3	55313.7	55313.2	55317.1	-4.8328	-3.414	-3.8694	-1.1988	0.003	-1.8924	-2.8065
55312.3	55313.7	55313.2	55317.1	-4.8338	-3.4146	-3.8666	-1.1998	0.0024	-1.8896	-2.8093
55312.3	55313.7	55313.2	55317.1	-4.8336	-3.4136	-3.8626	-1.1996	0.0034	-1.8856	-2.8119
55312.3	55313.7	55313.2	55317.1	-4.8318	-3.4102	-3.8548	-1.1978	0.0068	-1.8778	-2.8151
55312.3	55313.7	55313.3	55317.1	-4.8298	-3.4064	-3.8442	-1.1958	0.0106	-1.8672	-2.8183
55312.3	55313.7	55313.3	55317.1	-4.8294	-3.4036	-3.8342	-1.1954	0.0134	-1.8572	-2.8203
55312.3	55313.7	55313.3	55317.1	-4.8294	-3.4038	-3.8252	-1.1954	0.0132	-1.8482	-2.8197
55312.3	55313.7	55313.3	55317.1	-4.8264	-3.4022	-3.8134	-1.1924	0.0148	-1.8364	-2.8179
55312.3	55313.7	55313.3	55317.1	-4.8198	-3.3974	-3.7998	-1.1858	0.0196	-1.8228	-2.8155
55312.3	55313.7	55313.3	55317.1	-4.8122	-3.392	-3.79	-1.1782	0.025	-1.813	-2.8149
55312.3	55313.7	55313.3	55317.1	-4.81	-3.3904	-3.7876	-1.176	0.0266	-1.8106	-2.8195
55312.3	55313.7	55313.3	55317.1	-4.8108	-3.3922	-3.7894	-1.1768	0.0248	-1.8124	-2.8265
55312.3	55313.7	55313.3	55317.1	-4.812	-3.395	-3.7898	-1.178	0.022	-1.8128	-2.8339
55312.2	55313.7	55313.3	55317.1	-4.8128	-3.3968	-3.789	-1.1788	0.0202	-1.812	-2.8407
55312.2	55313.7	55313.3	55317.1	-4.8128	-3.398	-3.789	-1.1788	0.019	-1.812	-2.8463
55312.2	55313.6	55313.3	55317	-4.8124	-3.3964	-3.7894	-1.1784	0.0206	-1.8124	-2.8527
55312.2	55313.6	55313.2	55317	-4.8122	-3.3926	-3.7888	-1.1782	0.0244	-1.8118	-2.8607
55312.2	55313.6	55313.2	55317	-4.8112	-3.3892	-3.788	-1.1772	0.0278	-1.811	-2.8693
55312.2	55313.6	55313.2	55317	-4.813	-3.3908	-3.789	-1.179	0.0262	-1.812	-2.8791
55312.2	55313.6	55313.2	55317	-4.8158	-3.3954	-3.7908	-1.1818	0.0216	-1.8138	-2.8875
55312.2	55313.6	55313.2	55317	-4.8166	-3.3982	-3.7912	-1.1826	0.0188	-1.8142	-2.8937
55312.2	55313.6	55313.2	55317	-4.8154	-3.3974	-3.789	-1.1814	0.0196	-1.812	-2.8989
55312.2	55313.6	55313.2	55317	-4.8138	-3.3956	-3.7876	-1.1798	0.0214	-1.8106	-2.9035
55312.2	55313.6	55313.2	55317	-4.813	-3.3958	-3.7882	-1.179	0.0212	-1.8112	-2.9079
55312.2	55313.6	55313.2	55317	-4.8118	-3.3966	-3.789	-1.1778	0.0204	-1.812	-2.9127
55312.2	55313.6	55313.2	55317	-4.811	-3.397	-3.7888	-1.177	0.02	-1.8118	-2.9183
55312.2	55313.6	55313.2	55317	-4.8106	-3.3956	-3.7882	-1.1766	0.0214	-1.8112	-2.9245
55312.2	55313.6	55313.2	55317	-4.81	-3.3924	-3.7876	-1.176	0.0246	-1.8106	-2.9289
55312.2	55313.6	55313.2	55317	-4.8106	-3.3918	-3.7884	-1.1766	0.0252	-1.8114	-2.9315
55312.2	55313.6	55313.2	55317	-4.8124	-3.3938	-3.789	-1.1784	0.0232	-1.812	-2.9341
55312.1	55313.6	55313.2	55317	-4.8128	-3.395	-3.7882	-1.1788	0.022	-1.8112	-2.9373
55312.1	55313.6	55313.2	55317	-4.8104	-3.3934	-3.7854	-1.1764	0.0236	-1.8084	-2.9403
55312.1	55313.6	55313.2	55316.9	-4.8078	-3.3906	-3.7834	-1.1738	0.0264	-1.8064	-2.9435
55312.1	55313.6	55313.2	55316.9	-4.81	-3.3908	-3.7856	-1.176	0.0262	-1.8086	-2.9479
55312.1	55313.6	55313.2	55316.9	-4.8146	-3.3936	-3.7902	-1.1806	0.0234	-1.8132	-2.9529
55312.1	55313.5	55313.2	55316.9	-4.8166	-3.395	-3.793	-1.1826	0.022	-1.816	-2.9575
55312.1	55313.5	55313.1	55316.9	-4.8132	-3.3948	-3.7914	-1.1792	0.0222	-1.8144	-2.9607
55312.1	55313.5	55313.1	55316.9	-4.8112	-3.3946	-3.79	-1.1772	0.0224	-1.813	-2.9661
55312.1	55313.5	55313.1	55316.9	-4.813	-3.3962	-3.7916	-1.179	0.0208	-1.8146	-2.9741
55312.1	55313.5	55313.1	55316.9	-4.8138	-3.396	-3.7926	-1.1798	0.021	-1.8156	-2.9821
55312.1	55313.5	55313.1	55316.9	-4.8128	-3.3932	-3.7914	-1.1788	0.0238	-1.8144	-2.9907
55312.1	55313.5	55313.1	55316.9	-4.8106	-3.391	-3.788	-1.1766	0.026	-1.811	-2.9989
55312.1	55313.5	55313.1	55316.9	-4.8092	-3.3916	-3.7852	-1.1752	0.0254	-1.8082	-3.0071
55312.1	55313.5	55313.1	55316.9	-4.8094	-3.3936	-3.7858	-1.1754	0.0234	-1.8088	-3.0155
55312.1	55313.5	55313.1	55316.9	-4.8092	-3.3938	-3.7856	-1.1752	0.0232	-1.8086	-3.0251
55312.1	55313.5	55313.1	55316.9	-4.809	-3.3918	-3.7844	-1.175	0.0252	-1.8074	-3.0355
[truncated: 11,961 more rows]
